# Supplementary material for: An In Silico Model for Predicting Drug-Induced Hepatotoxicity
Source: Int J Mol Sci. 2019 Apr 17;20(8):1897. doi: 10.3390/ijms20081897 (PMC6515336; doi:10.3390/ijms20081897)
Supplement: Supplementary file 1 [file ijms-20-01897-s001.zip › Supplementary file 2.xlsx]

## Sheet: Training set
Training set
ID	Compound	SMILE	Label	PMID/DOI	Database source	Annatation	Notes
1	Metformin	CN(C)C(=N)N=C(N)N	Neg	PMID: 27418937	Pubmed	Collected by the present study	CNKI: China National Knowledge Infrastructure Database
2	Monomethyl Fumarate	COC(=O)C=CC(O)=O	Neg	PMID: 22136107	Pubmed	Collected by the present study	DILI: Drug induced liver injury
3	Cinnamic Acid	OC(=O)C=CC1=CC=CC=C1	Neg	DOI: 10.3969/j.issn.1001-1528.2017.01.031	CNKI	Collected by the present study
4	Carvacrol	CC(C)C1=CC(O)=C(C)C=C1	Neg	PMID: 22136107	Pubmed	Collected by the present study
5	P-Anisic Acid	COC1=CC=C(C=C1)C(O)=O	Neg	PMID: 22136107	Pubmed	Collected by the present study
6	Geraniol	CC(C)=CCCC(C)=CCO	Neg	PMID: 28070230	Pubmed	Collected by the present study
7	Decaldehyde	CCCCCCCCCC=O	Neg	PMID: 22136107	Pubmed	Collected by the present study
8	Boschniakine	CC1CCC2=C1C=NC=C2C=O	Neg	PMID: 17490493	Pubmed	Collected by the present study
9	2-Methoxycinnamaldehyde	COC1=CC=CC=C1C=CC=O	Neg	DOI: 10.3969/j.issn.1672-4992.2018.16.037	CNKI	Collected by the present study
10	Allicin	C=CCSS(=O)CC=C	Neg	PMID: 26828466	Pubmed	Collected by the present study
11	Paeonol	COC1=CC(O)=C(C=C1)C(C)=O	Neg	PMID: 26828466	Pubmed	Collected by the present study
12	6,7-Dimethyl-Coumarin	CC1=CC2=C(C=CC(=O)O2)C=C1C	Neg	1001-5256(2011)05-0451-07	CNKI	Collected by the present study
13	L-Theanine	CCNC(=O)CCC(N)C(O)=O	Neg	DOI: 10.13748/j.cnki.issn1007-7693.2015.09.031	CNKI	Collected by the present study
14	Glucuronolactone	OC(C=O)C1OC(=O)C(O)C1O	Neg	DOI: 10.14188/j.ajsh.2018.02.009	CNKI	Collected by the present study
15	Esculetin	OC1=C(O)C=C2C=CC(=O)OC2=C1	Neg	DOI: 10.4268/cjcmm20110410	CNKI	Collected by the present study
16	Methyl-P-Coumarate	COC(=O)C=CC1=CC=C(O)C=C1	Neg	PMID: 17490493	Pubmed	Collected by the present study
17	N-Butylidenephthalide	CCCC=C1OC(=O)C2=CC=CC=C12	Neg	PMID: 26828466	Pubmed	Collected by the present study
18	7-Methoxy-2,2-Dimethyl -Chromene	COC1=CC=C2C=CC(C)(C)OC2=C1	Neg	PMID: 17490493	Pubmed	Collected by the present study
19	Scopoletin	COC1=C(O)C=C2OC(=O)C=CC2=C1	Neg	PMID: 29309862	Pubmed	Collected by the present study
20	Ferulic Acid	COC1=C(O)C=CC(C=CC(O)=O)=C1	Neg	DOI: 10.3969/j.issn.1672-4992.2014.02.76	CNKI	Collected by the present study
21	Neoswertin	CC=C1CNC(O)C2=C1CCOC2=O	Neg	DOI: 10.15991/j.cnki.41-1361/r.2011.04.006	CNKI	Collected by the present study
22	4-(2-Formyl-5-Hydroxypyrrol-1-Yl)Butanoic Acid	OC(=O)CCCN1C(O)=CC=C1C=O	Neg	PMID: 19844860	Pubmed	Collected by the present study
23	Salvianic Acid A	OC(CC1=CC(O)=C(O)C=C1)C(O)=O	Neg	DOI: 10.3969/j.issn.1003-9783.2016.03.028	CNKI	Collected by the present study
24	Ethyl Gallate	CCOC(=O)C1=CC(O)=C(O)C(O)=C1	Neg	DOI: 10.13194/j.issn.1673-842x.2016.11.034	CNKI	Collected by the present study
25	Buergerinin B	CC1(O)CC(O)C2(O)CC(=O)OCC12	Neg	DOI: 10.15991/j.cnki.41-1361/r.2011.04.006	CNKI	Collected by the present study
26	Piscrocin D	OC1C(O)C2(O)COC3OCCC1C23	Neg	DOI: 10.15991/j.cnki.41-1361/r.2011.04.006	CNKI	Collected by the present study
27	Calamenene	CC(C)C1CCC(C)C2=C1C=C(C)C=C2	Neg	PMID: 17490493	Pubmed	Collected by the present study
28	β-Caryophyllene	CC1=CCCC(=C)C2CC(C)(C)C2CC1	Neg	PMID: 17490493	Pubmed	Collected by the present study
29	Valencene	CC1CCC=C2CCC(CC12C)C(C)=C	Neg	PMID: 29953177	Pubmed	Collected by the present study
30	Elemene	CC(=C)C1CCC(C)(C=C)C(C1)C(C)=C	Neg	PMID: 26828466	Pubmed	Collected by the present study
31	Eudesmane	CC(C)C1CCC2(C)CCCC(C)C2C1	Neg	PMID: 29309862	Pubmed	Collected by the present study
32	Ononitol Monohydrate	OCC1C(O)C(O)C(O)C(O)C1O	Neg	PMID: 29309862	Pubmed	Collected by the present study
33	Isofraxidin	COC1=C(O)C(OC)=C2OC(=O)C=CC2=C1	Neg	PMID: 26828466	Pubmed	Collected by the present study
34	Melatonin	COC1=CC2=C(NC=C2CCNC(C)=O)C=C1	Neg	PMID: 28070230	Pubmed	Collected by the present study
35	Costunolide	CC1=CCCC(C)=CC2OC(=O)C(=C)C2CC1	Neg	PMID: 24747984	Pubmed	Collected by the present study
36	1β--Hydroxy-10β-H-Guaia-4,11-Dien-3-One	[H]C1(CCC(C)C2(O)CC(=O)C(C)=C2C1)C(C)=C	Neg	PMID: 15104485	Pubmed	Collected by the present study
37	Caryolane 1,9β-Diol	CC1(C)CC2C1CCC1(C)CC2(O)CCC1O	Neg	PMID: 15104485	Pubmed	Collected by the present study
38	Biphenyldicarboxylate	OC(=O)C1=CC=CC(C2=CC=CC=C2)=C1C(O)=O	Neg	PMID: 18939987	Pubmed	Collected by the present study
39	Parthenolide	CC1=CCCC2(C)OC2C2OC(=O)C(=C)C2CC1	Neg	DOI：10.19613/j.cnki.1671-3141.2017.99.037	CNKI	Collected by the present study
40	Onitin	CC1=C(CCO)C(C)=C(O)C2=C1C(=O)C(C)(C)C2	Neg	PMID: 26333346	Pubmed	Collected by the present study
41	Daidzein	OC1=CC=C(C=C1)C1=COC2=C(C=CC(O)=C2)C1=O	Neg	1000-2790(2006)18-1665-03	CNKI	Collected by the present study
42	Chrysin	OC1=CC(O)=C2C(=O)C=C(OC2=C1)C1=CC=CC=C1	Neg	PMID: 28070230	Pubmed	Collected by the present study
43	Liquiritigenin	OC1=CC=C(C=C1)C1CC(=O)C2=C(O1)C=C(O)C=C2	Neg	PMID: 26828466	Pubmed	Collected by the present study
44	Isoliquiritigenin	OC1=CC=C(C=CC(=O)C2=C(O)C=C(O)C=C2)C=C1	Neg	DOI：10.13412/j.cnki.zyyl.2017.01.065	CNKI	Collected by the present study
45	Thalidomide	O=C1N(C2CCC(=O)NC2=O)C(=O)C2=CC=CC=C12	Pos	PMID: 17966118	Pubmed	Collected by the present study
46	Linderane	CC1=COC2=C1C1OC(=O)C3(CCC=C(C)C2)OC13	Neg	-	CNKI	Collected by the present study
47	Kinsenoside	OCC1OC(OC2COC(=O)C2)C(O)C(O)C1O	Neg	PMID: 29953177	Pubmed	Collected by the present study
48	Baicalein	OC1=C(O)C(O)=C2C(=O)C=C(OC2=C1)C1=CC=CC=C1	Neg	PMID: 26828466	Pubmed	Collected by the present study
49	Naringenin	OC1=CC=C(C=C1)C1CC(=O)C2=C(O)C=C(O)C=C2O1	Neg	PMID: 17490493	Pubmed	Collected by the present study
50	Artemisinin	CC1CCC2C(C)C(=O)OC3OC4(C)CCC1C23OO4	Pos	PMID: 26006028	Pubmed	Collected by the present study
51	Wogonin	COC1=C(O)C=C(O)C2=C1OC(=CC2=O)C1=CC=CC=C1	Neg	PMID: 29616383	Pubmed	Collected by the present study
52	Arjunolone	COC1=CC2=C(C=C1O)C(=O)C=C(O2)C1=CC=C(O)C=C1	Neg	PMID: 29616383	Pubmed	Collected by the present study
53	Dihydroartemisinin	CC1CCC2C(C)C(O)OC3OC4(C)CCC1C23OO4	Neg	PMID: 26828466	Pubmed	Collected by the present study
54	Gastrodin	OCC1OC(OC2=CC=C(CO)C=C2)C(O)C(O)C1O	Neg	PMID: 26828466	Pubmed	Collected by the present study
55	Kushenin	COC1=C(O)C=C2OC3C(COC4=C3C=CC(O)=C4)C2=C1	Neg	PMID: 24423652	Pubmed	Collected by the present study
56	Delta(8)-Tetrahydrocannabivarin	[H]C12CC=C(C)CC1C1=C(OC2(C)C)C=C(CCC)C=C1O	Neg	PMID: 28070230	Pubmed	Collected by the present study
57	Neocrotocembranal	CC(C)C1=CC=C(C)CCC=C(C)CCC=C(CC1)C=O	Neg	PMID: 29309862	Pubmed	Collected by the present study
58	Aromadendrin	OC1C(OC2=CC(O)=CC(O)=C2C1=O)C1=CC=C(O)C=C1	Neg	PMID: 28486192	Pubmed	Collected by the present study
59	(-)-Nodakenetin Acetate	[H]C1(CC2=CC3=C(OC(=O)C=C3)C=C2O1)C(C)(C)OC(C)=O	Neg	PMID: 17490493	Pubmed	Collected by the present study
60	Mukulol	CC(C)C1CCC(C)=CCCC(C)=CCCC(C)=CC1O	Neg	PMID: 29309862	Pubmed	Collected by the present study
61	6-Gingerol	CCCCCC(O)CC(=O)CCC1=CC(OC)=C(O)C=C1	Neg	DOI: 10.3969/j.issn.1005-5304.2016.07.011	CNKI	Collected by the present study
62	Embelin	CCCCCCCCCCCC1=C(O)C(=O)C=C(O)C1=O	Neg	PMID: 22136107	Pubmed	Collected by the present study
63	Cryptotanshinone	CC1COC2=C1C(=O)C(=O)C1=C2C=CC2=C1CCCC2(C)C	Neg	PMID: 26828466	Pubmed	Collected by the present study
64	Phytol	CC(C)CCCC(C)CCCC(C)CCCC(C)=CCO	Neg	PMID: 26879574	Pubmed	Collected by the present study
65	Clausenamide	CN1C(C(O)C2=CC=CC=C2)C(C(O)C1=O)C1=CC=CC=C1	Neg	PMID: 17490493	Pubmed	Collected by the present study
66	Retinoic Acid	CC(C=CC1=C(C)CCCC1(C)C)=CC=CC(C)=CC(O)=O	Pos	DOI: 10.13424/j.cnki.mtcm.2018.01.032	CNKI	Collected by the present study
67	(+)-Taxifolin，(+)-Epitaxifolin	OC1C(OC2=CC(O)=CC(O)=C2C1=O)C1=CC(O)=C(O)C=C1	Neg	PMID: 28486192	Pubmed	Collected by the present study
68	Moscatilin	COC1=CC(CCC2=CC(OC)=C(O)C=C2)=CC(OC)=C1O	Neg	DOI: 10.13863/j.issn1001-4454.2010.09.047	CNKI	Collected by the present study
69	Anisodamine	CN1C2CC(O)C1CC(C2)OC(=O)C(CO)C1=CC=CC=C1	Neg	DOI: 10.13753/j.issn.1007-6611.2018.08.005	CNKI	Collected by the present study
70	Capsaicin	COC1=C(O)C=CC(CNC(=O)CCCCC=CC(C)C)=C1	Neg	DOI: 10.3969/j.issn.1001-5639.2010.03.036	CNKI	Collected by the present study
71	Armepavine	COC1=C(OC)C=C2C(CC3=CC=C(O)C=C3)N(C)CCC2=C1	Neg	PMID: 29992106	Pubmed	Collected by the present study
72	Wedelolactone	COC1=CC(O)=C2C3=C(C4=CC(O)=C(O)C=C4O3)C(=O)OC2=C1	Neg	PMID: 22136107	Pubmed	Collected by the present study
73	Ladanein	COC1=CC=C(C=C1)C1=CC(=O)C2=C(O)C(O)=C(OC)C=C2O1	Neg	PMID: 23524937	Pubmed	Collected by the present study
74	Capillarisin	COC1=C(O)C=C2OC(OC3=CC=C(O)C=C3)=CC(=O)C2=C1O	Neg	PMID: 17490493	Pubmed	Collected by the present study
75	Isorhamnetin	COC1=C(O)C=CC(=C1)C1=C(O)C(=O)C2=C(O)C=C(O)C=C2O1	Neg	PMID: 26828466	Pubmed	Collected by the present study
76	Piplartine	COC1=CC(C=CC(=O)N2CCC=CC2=O)=CC(OC)=C1OC	Neg	PMID: 22136107	Pubmed	Collected by the present study
77	Myricetin	OC1=CC(O)=C2C(OC(=C(O)C2=O)C2=CC(O)=C(O)C(O)=C2)=C1	Neg	PMID: 27570425	Pubmed	Collected by the present study
78	Erianin	COC1=CC(CCC2=CC(O)=C(OC)C=C2)=CC(OC)=C1OC	Neg	PMID: 26006028	Pubmed	Collected by the present study
79	Decursin	CC(C)=CC(=O)OC1CC2=C(OC1(C)C)C=C1OC(=O)C=CC1=C2	Neg	DOI: 10.13748/j.cnki.issn1007-7693.2015.09.031	CNKI	Collected by the present study
80	Aurantio-Obtusin	COC1=C(O)C=C2C(=O)C3=CC(C)=C(O)C(OC)=C3C(=O)C2=C1O	Neg	DOI: 10.11675/j.issn.0253-4304.2016.01.26	CNKI	Collected by the present study
81	Ombuine	COC1=CC(O)=C2C(=O)C(O)=C(OC2=C1)C1=CC(O)=C(OC)C=C1	Neg	PMID: 26633388	Pubmed	Collected by the present study
82	Malvidin	COC1=CC(=CC(OC)=C1O)C1=C(O)C=C2C(O)=CC(O)=CC2=[O+]1	Neg	PMID: 29309862	Pubmed	Collected by the present study
83	N-2-[4-(3,3-Dimethylallyloxy) Phenyl] Ethylcinnamide	CC(C)=CCOC1=CC=C(CCNC(=O)C=CC2=CC=CC=C2)C=C1	Neg	PMID: 28650205	Pubmed	Collected by the present study
84	Delphinidin	OC1=CC2=[O+]C(=C(O)C=C2C(O)=C1)C1=CC(O)=C(O)C(O)=C1	Neg	PMID: 27350107	Pubmed	Collected by the present study
85	Phyllocoumarin	OC1CC2=C(O)C=C3OC(=O)C=CC3=C2OC1C1=CC(O)=C(O)C=C1	Neg	DOI: 10.3969/j.issn.1006-0111.2012.02.005	CNKI	Collected by the present study
86	Aucubin	OCC1OC(OC2OC=CC3C(O)C=C(CO)C23)C(O)C(O)C1O	Neg	PMID: 17490493	Pubmed	Collected by the present study
87	Dehydroandrographolide	CC1(CO)C(O)CCC2(C)C(CC=C3C(O)=COC3=O)C(=C)CCC12	Neg	PMID: 27350107	Pubmed	Collected by the present study
88	Tephrosone	CC1(C)OC2OC3=C(C2C1O)C(O)=C(C=C3)C(=O)C=CC1=CC=CC=C1	Neg	PMID: 22136107	Pubmed	Collected by the present study
89	Parfumine	COC1=C(O)C=C2C(CCN(C)C22CC3=C(C2=O)C2=C(OCO2)C=C3)=C1	Neg	PMID: 29309862	Pubmed	Collected by the present study
90	Oridonin	CC1(C)CCC(O)C23COC(O)(C(O)C12)C12C(O)C(CCC31)C(=C)C2=O	Neg	PMID: 26828466	Pubmed	Collected by the present study
91	Tenacigenin B	CC(=O)C1CCC23OC22CCC4CC(O)CCC4(C)C2C(O)C(O)C13C	Neg	0253-2670(2012)06-1203-10	CNKI	Collected by the present study
92	Curcumin	COC1=C(O)C=CC(C=CC(=O)CC(=O)C=CC2=CC(OC)=C(O)C=C2)=C1	Neg	PMID: 22136107	Pubmed	Collected by the present study
93	Fargesin	COC1=C(OC)C=C(C=C1)C1OCC2C1COC2C1=CC2=C(OCO2)C=C1	Neg	PMID: 29309862	Pubmed	Collected by the present study
94	2-Hydroxyyunnandaphnine D	COC(=O)C1CC23C4N5CC(C)C4(O)CCC2(C)C(C5)CCC2=C3C1CC2	Neg	DOI: 10.14035/j.cnki.hljyy.2015.03.013	CNKI	Collected by the present study
95	Spicatolignan B	COC1=CC(C=CC(O)=O)=CC2=C1OC(C2CO)C1=CC(OC)=C(O)C=C1	Neg	PMID: 22136107	Pubmed	Collected by the present study
96	Irisquinone	CCCCCCC=CCCCCCCCCCC1=CC(=O)C=C(OC)C1=O	Neg	DOI: 10.3969/j.issn.1672-4992.2014.02.76	CNKI	Collected by the present study
97	Anastatin A	OC1=CC=C(C=C1)C1CC(=O)C2=C(O1)C=C1OC3=CC(O)=C(O)C=C3C1=C2O	Neg	PMID: 28486192	Pubmed	Collected by the present study
98	Calebin A	COC1=C(O)C=CC(C=CC(=O)COC(=O)C=CC2=CC(OC)=C(O)C=C2)=C1	Neg	1000-2790(2009)01-0007-04	CNKI	Collected by the present study
99	Artesunate	CC1CCC2C(C)C(OC(=O)CCC(O)=O)OC3OC4(C)CCC1C23OO4	Pos	PMID: 26156416	Pubmed	Collected by the present study
100	Vitamin D	CC(C)CCCC(C)C1CCC2C(CCCC12C)=CC=C1CC(O)CCC1=C	Neg	PMID: 27006654	Pubmed	Collected by the present study
101	Polydatin	OCC1OC(OC2=CC(C=CC3=CC=C(O)C=C3)=CC(O)=C2)C(O)C(O)C1O	Neg	PMID: 27366355	Pubmed	Collected by the present study
102	2,2′,5,5′-Tetramethoxy-3,4,3′,4′-Dimethylenedioxy-6,6′-Dimethyl Biphenyl	COC1=C2OCOC2=C(OC)C(=C1C)C1=C(OC)C2=C(OCO2)C(OC)=C1C	Neg	PMID: 19061947	Pubmed	Collected by the present study
103	Antroquinonol	COC1=C(OC)C(=O)C(C)C(CC=C(C)CCC=C(C)CCC=C(C)C)C1O	Neg	PMID: 24716143	Pubmed	Collected by the present study
104	Brucine	COC1=C(OC)C=C2C(=C1)N1C3C4C(CC1=O)OCC=C1CN5CCC23C5CC41	Neg	1674-5515(2012)06-0624-05	CNKI	Collected by the present study
105	Anthricin	COC1=CC(=CC(OC)=C1OC)C1C2C(COC2=O)CC2=CC3=C(OCO3)C=C12	Neg	0253-2670(2002)08-0722-03	CNKI	Collected by the present study
106	S-Adenosylmethionine	C[S+](CCC(N)C(O)=O)CC1OC(C(O)C1O)N1C=NC2=C1N=CN=C2N	Neg	PMID: 17966118	Pubmed	Collected by the present study
107	Nobiletin	COC1=C(OC)C=C(C=C1)C1=CC(=O)C2=C(O1)C(OC)=C(OC)C(OC)=C2OC	Neg	PMID: 26828466	Pubmed	Collected by the present study
108	Sarcaglaboside A	CC1=C2CC3C(=C)CCC(OC4OC(CO)C(O)C(O)C4O)C3(C)CC2OC1=O	Neg	DOI: 10.15991/j.cnki.41-1361/r.2011.04.006	CNKI	Collected by the present study
109	Chrysophanols 1-O-Glucoside	[H]C1(CO)OC(OC2=C3C(=O)C4=C(C=CC=C4O)C(=O)C3=CC(C)=C2)C(O)C(O)C1O	Neg	PMID: 29616383	Pubmed	Collected by the present study
110	Gomisin A	COC1=C(OC)C(OC)=C2C(CC(C)(O)C(C)CC3=CC4=C(OCO4)C(OC)=C23)=C1	Neg	PMID: 26828466	Pubmed	Collected by the present study
111	Tigogenin	CC1C2C(CC3C4CCC5CC(O)CCC5(C)C4CCC23C)OC11CCC(C)CO1	Neg	PMID: 26828466	Pubmed	Collected by the present study
112	Bifendate	COC(=O)C1=CC(OC)=C2OCOC2=C1C1=C2OCOC2=C(OC)C=C1C(=O)OC	Neg	PMID: 22311412	Pubmed	Collected by the present study
113	Phyllanthin	COCC(CC1=CC(OC)=C(OC)C=C1)C(COC)CC1=CC(OC)=C(OC)C=C1	Neg	PMID: 22136107	Pubmed	Collected by the present study
114	Mangiferrin	OCC1OC(C(O)C(O)C1O)C1=C(O)C=C2OC3=CC(O)=C(O)C=C3C(=O)C2=C1O	Neg	PMID: 22136107	Pubmed	Collected by the present study
115	Lupeone	CC(=C)C1CCC2(C)CCC3(C)C(CCC4C5(C)CCC(=O)C(C)(C)C5CCC34C)C12	Neg	PMID: 29953177	Pubmed	Collected by the present study
116	Tephrorins A	COC1=C(C2C(O)OC(C)(C)C2OC(C)=O)C2=C(C=C1)C(=O)CC(O2)C1=CC=CC=C1	Neg	PMID: 22136107	Pubmed	Collected by the present study
117	Hopenol-B	CC(=C)C1CCC2(C)C1CCC1(C)C2CCC2C3(C)CCC(O)C(C)(C)C3CCC12C	Neg	PMID: 29953177	Pubmed	Collected by the present study
118	Vanitaracin A	CCC(C)CC(C)C(=O)OC1C(=O)C2=C3CC(O)CC(C)C3=C(O)C=C2C(C)(O)C1=O	Neg	PMID: 27350107	Pubmed	Collected by the present study
119	Polygonin	CC1C2C(CC3C4CCC5CC(O)CC(O)C5(C)C4CCC23C)OC11CCC(C)CO1	Neg	PMID: 29616383	Pubmed	Collected by the present study
120	Isosalipurposide	OCC1OC(OC2=CC(O)=CC(O)=C2C(=O)C=CC2=CC=C(O)C=C2)C(O)C(O)C1O	Neg	PMID: 30131818	Pubmed	Collected by the present study
121	Waltonitone	[H]C12CCC3(C)C([H])(CC=C4C5([H])C(C)C(C)CCC5(CO)CCC34C)C1(C)CCC(=O)C2(C)C	Neg	PMID: 26828466	Pubmed	Collected by the present study
122	Folic Acid	NC1=NC(=O)C2=NC(CNC3=CC=C(C=C3)C(=O)NC(CCC(O)=O)C(O)=O)=CN=C2N1	Neg	PMID: 28070230	Pubmed	Collected by the present study
123	Betulin	CC(=C)C1CCC2(CO)CCC3(C)C(CCC4C5(C)CCC(O)C(C)(C)C5CCC34C)C12	Neg	DOI: 10.15991/j.cnki.41-1361/r.2011.04.006	CNKI	Collected by the present study
124	Phegopolin	COC1=CC2=C(C(O)=C1)C(=O)C=C(O2)C1=CC=C(OC2OC(CO)C(O)C(O)C2O)C=C1	Neg	PMID: 26858648	Pubmed	Collected by the present study
125	5-Methoxy-(3,4"-Dihydro-3",4"-Diacetoxy)-2",2'-Dimethylpyrano- (7,8:5",6")-Flavone	[H]C1(OC(C)=O)C2=C3OC(=CC(=O)C3=C(OC)C=C2OC(C)(C)C1([H])OC(C)=O)C1=CC=CC=C1	Neg	PMID: 23524937	Pubmed	Collected by the present study
126	Ganoderiol F	CC(CCC=C(CO)CO)C1CCC2(C)C3=CCC4C(C)(C)C(=O)CCC4(C)C3=CCC12C	Neg	PMID: 26828466	Pubmed	Collected by the present study
127	Boswellic Acid	CC1(C)CCC2(C)CCC3(C)C(=CCC4C5(C)CCC(O)C(C)(C5CCC34C)C(O)=O)C2C1	Neg	PMID: 29953177	Pubmed	Collected by the present study
128	Betulinic Acid	CC(=C)C1CCC2(CCC3(C)C(CCC4C5(C)CCC(O)C(C)(C)C5CCC34C)C12)C(O)=O	Neg	PMID: 27570425	Pubmed	Collected by the present study
129	Cinobufotalin	CC(=O)OC1C2OC22C3CCC4(O)CC(O)CCC4(C)C3CCC2(C)C1C1=COC(=O)C=C1	Neg	PMID: 26828466	Pubmed	Collected by the present study
130	Nimbinin	CC(=O)OC1CC2C(C)(C)C(=O)C=CC2(C)C2CCC3(C)C(C(=O)C4OC34C12C)C1=COC=C1	Neg	PMID: 21595500	Pubmed	Collected by the present study
131	Lupeol Acetate	CC(=O)OC1CCC2(C)C(CCC3(C)C2CCC2C4C(CCC4(C)CCC32C)C(C)=C)C1(C)C	Neg	PMID: 29867473	Pubmed	Collected by the present study
132	Limonin	CC1(C)OC2CC(=O)OCC22C1CC(=O)C1(C)C2CCC2(C)C(OC(=O)C3OC123)C1=COC=C1	Neg	DOI: 10.3969/j.issn.1003-9783.2016.03.028	CNKI	Collected by the present study
133	Amooranin	CC1(C)CCC2(CCC3(C)C(=CCC4C3(C)CCC3C(C)(C)C(=O)CCC43CO)C2C1)C(O)=O	Neg	PMID: 22136107	Pubmed	Collected by the present study
134	Momordicin	COCC12CCC(C)C(C)C1C1(O)C=CC3C4(C)CCC(=O)C(C)(C)C4CCC3(C)C1(C)CC2	Neg	PMID: 21595500	Pubmed	Collected by the present study
135	Maslinic Acid	CC1(C)CCC2(CCC3(C)C(=CCC4C5(C)CC(O)C(O)C(C)(C)C5CCC34C)C2C1)C(O)=O	Neg	1008-049X(2017)09-1638-05	CNKI	Collected by the present study
136	Curculignin A	CC(C)C(=O)CCC(C)C1C(O)CC2(C)C3CCC4C5(CC35C(O)CC12C)CCC(O)C4(C)C	Neg	PMID: 20619136	Pubmed	Collected by the present study
137	Paeoniflorin	CC12CC3(O)OC(O1)C1(COC(=O)C4=CC=CC=C4)C3CC21OC1OC(CO)C(O)C(O)C1O	Neg	PMID: 29616383	Pubmed	Collected by the present study
138	Tephrorins B	CC1(C)OCC(C1OC(=O)C=CC1=CC=CC=C1)C1=C(O)C=CC2=C1OC(CC2=O)C1=CC=CC=C1	Neg	PMID: 22136107	Pubmed	Collected by the present study
139	Camelliagenin C	CC1(C)CC(O)C2(CO)C(O)CC3(C)C(=CCC4C5(C)CCC(O)C(C)(CO)C5CCC34C)C2C1	Neg	PMID: 17490493	Pubmed	Collected by the present study
140	Auricularine	CN(C)CCC1=C(NC2=CC=CC=C12)C1C2C(C=C(C)CC2(C)C)C23NC4=CC=CC=C4C12CCN3C	Neg	PMID: 22136107	Pubmed	Collected by the present study
141	Aconine	CCN1CC2(COC)C3C(OC)C4C1C3(C1CC3(O)C(O)C1C4(O)C(O)C3OC)C(CC2O)OC	Neg	DOI: 10.13194/j.issn.1673-842x.2013.12.018	CNKI	Collected by the present study
142	Ganoderiol I	COC1CC2C(C)(C)C(=O)CCC2(C)C2=C1C1(C)C(O)CC(C(C)CCC=C(CO)CO)C1(C)CC2	Neg	PMID: 28650205	Pubmed	Collected by the present study
143	Raffinose	OCC1OC(CO)(OC2OC(COC3OC(CO)C(O)C(O)C3O)C(O)C(O)C2O)C(O)C1O	Neg	PMID: 17490493	Pubmed	Collected by the present study
144	Hypericin	CC1=CC(O)=C2C(=O)C3=C(O)C=C(O)C4=C3C3=C5C6=C(C(C)=CC(O)=C6C(=O)C6=C(O)C=C(O)C4=C56)C1=C23	Neg	1000-744X(2018)02-0164-03	CNKI	Collected by the present study
145	Interiotherin A	COC1=C2C(CC(C)C(C)C(OC(=O)C3=CC=CC=C3)C3=CC4=C(OCO4)C(OC)=C23)=CC2=C1OCO2	Neg	DOI: 10.13457/j.cnki.jncm.2009.07.003	CNKI	Collected by the present study
146	Kutkoside	COC1=C(O)C=CC(=C1)C(=O)OCC12OC1C(O)C1C=COC(OC3OC(CO)C(O)C(O)C3O)C21	Neg	PMID: 22136107	Pubmed	Collected by the present study
147	Racemosic Acid	[H]C12OC3=C(C(O)=C(C(C)=CC(O)=O)C(O)=C3C1([H])OC([H])(CO)C(O)C2O)C1([H])OC(CO)C(O)C(O)C1O	Neg	PMID: 22136107	Pubmed	Collected by the present study
148	Rehmannioside B	OCC1OC(OC2C3OC3(CO)C3C2C=COC3OC2OC(CO)C(O)C(O)C2O)C(O)C(O)C1O	Neg	PMID: 17490493	Pubmed	Collected by the present study
149	Kukoamine A	OC1=C(O)C=C(CCC(=O)NCCCNCCCCNCCCNC(=O)CCC2=CC(O)=C(O)C=C2)C=C1	Neg	PMID: 29309862	Pubmed	Collected by the present study
150	Alisol A 24-Acetate	CC(CC(O)C(OC(C)=O)C(C)(C)O)C1=C2CC(O)C3C4(C)CCC(=O)C(C)(C)C4CCC3(C)C2(C)CC1	Neg	PMID: 28662316	Pubmed	Collected by the present study
151	Pyropheophorbide	CCC1=C2NC(C=C3NC(=CC4=N\C(C(CCC(O)=O)C4C)=C4\CC(=O)C5=C(C)C(=C2)N=C45)C(C)=C3C=C)=C1C	Neg	PMID: 27350107	Pubmed	Collected by the present study
152	Tinosporic Acid	COC1=C(CC(C)O)C2=C3C(C(=O)C=C4OCOC5=CC(O)=C6OC(C(O)=O)=C(CC(C)O)C2=C6C5=C34)=C1O	Neg	PMID: 21595500	Pubmed	Collected by the present study
153	Lycopene	CC(C)=CCCC(C)=CC=CC(C)=CC=CC(C)=CC=CC=C(C)C=CC=C(C)C=CC=C(C)CCC=C(C)C	Neg	DOI: 10.15991/j.cnki.41-1361/r.2011.04.006	CNKI	Collected by the present study
154	Robustaflavone	OC1=CC=C(C=C1)C1=CC(=O)C2=C(O)C(=C(O)C=C2O1)C1=C(O)C=CC(=C1)C1=CC(=O)C2=C(O)C=C(O)C=C2O1	Neg	DOI: 10.3969/j.issn.1006-0111.2012.02.005	CNKI	Collected by the present study
155	Oleuropein	COC(=O)C1=COC(OC2OC(CO)C(O)C(O)C2O)C(=CC)C1CC(=O)OCCC1=CC(O)=C(O)C=C1	Neg	PMID: 24987431	Pubmed	Collected by the present study
156	Chamaechromone	OC1=CC=C(C=C1)C(C(C(=O)C1=C(O)C=C(O)C=C1O)C1=COC2=CC(O)=CC(O)=C2C1=O)C1=CC=C(O)C=C1	Neg	DOI: 10.3969/j.issn.1006-0111.2012.02.005	CNKI	Collected by the present study
157	Betacyanin	OCC1OC(OC2=C(O)C=C3C(CC(C([O-])=O)[N+]3=CC=C3CC(NC(=C3)C(O)=O)C(O)=O)=C2)C(O)C(O)C1O	Neg	PMID: 25587347	Pubmed	Collected by the present study
158	Carpesterol	CCC(CC(O)C(C)C1CCC2C3=CC(=O)C4C(C)C(CCC4(C)C3CCC12C)OC(=O)C1=CC=CC=C1)C(C)C	Neg	PMID: 22136107	Pubmed	Collected by the present study
159	Apiin	OCC1OC(OC2=CC(O)=C3C(=O)C=C(OC3=C2)C2=CC=C(O)C=C2)C(OC2OCC(O)(CO)C2O)C(O)C1O	Neg	PMID: 22136107	Pubmed	Collected by the present study
160	Theaflavin	OC1CC2=C(O)C=C(O)C=C2OC1C1=CC(O)=C(O)C2=C(O)C(=O)C=C(C=C12)C1OC2=CC(O)=CC(O)=C2CC1O	Neg	PMID: 24987431	Pubmed	Collected by the present study
161	Swerilactones H	[H]C12CC3([H])C4([H])C5OC(C)C6=C(CCOC6O)C5(C(O)C5=C4C(COC5=O)=CC3(C(C)O1)C1=C2C(=O)OCC1)C(=O)OC	Neg	PMCID: PMC4131710	Pubmed	Collected by the present study
162	Lutein	CC(C=CC=C(C)C=CC1C(C)=CC(O)CC1(C)C)=CC=CC=C(C)C=CC=C(C)C=CC1=C(C)CC(O)CC1(C)C	Neg	PMID: 28070230	Pubmed	Collected by the present study
163	Trillin	CC1C2C(CC3C4CC=C5CC(CCC5(C)C4CCC23C)OC2OC(CO)C(O)C(O)C2O)OC11CCC(C)CO1	Neg	PMID: 27570425	Pubmed	Collected by the present study
164	Neomangiferin	OCC1OC(OC2=C(O)C=C3OC4=CC(O)=C(C5OC(CO)C(O)C(O)C5O)C(O)=C4C(=O)C3=C2)C(O)C(O)C1O	Neg	PMID: 27570425	Pubmed	Collected by the present study
165	Pheophorbide A	CCC1=C2NC(C=C3NC(=CC4=N\C(C(CCC(O)=O)C4C)=C4\C(C(=O)OC)C(=O)C5=C(C)C(=C2)N=C45)C(C)=C3C=C)=C1C	Neg	PMID: 26828466	Pubmed	Collected by the present study
166	Kaempferol-3-O-Rutinoside	CC1OC(OCC2OC(OC3=C(OC4=CC(O)=CC(O)=C4C3=O)C3=CC=C(O)C=C3)C(O)C(O)C2O)C(O)C(O)C1O	Neg	-	CNKI	Collected by the present study
167	2-O-Glycosylisovitexin	OCC1OC(OC2C(O)C(O)C(CO)OC2C2=C(O)C=C3OC(=CC(=O)C3=C2O)C2=CC=C(O)C=C2)C(O)C(O)C1O	Neg	PMID: 26858648	Pubmed	Collected by the present study
168	Procyanidine	OC1C(O)C(OC2CC3=C(O)C=C(O)C=C3OC2C2=CC(O)=C(O)C=C2)(OC2=CC(O)=CC(O)=C12)C1=CC(O)=C(O)C=C1	Neg	PMID: 26006028	Pubmed	Collected by the present study
169	Astaxanthin	CC(C=CC=C(C)C=CC1=C(C)C(=O)C(O)CC1(C)C)=CC=CC=C(C)C=CC=C(C)C=CC1=C(C)C(=O)C(O)CC1(C)C	Neg	DOI: 10.15991/j.cnki.41-1361/r.2011.04.006	CNKI	Collected by the present study
170	Cepharanthine	COC1=C2OC3=CC=C(CC4N(C)CCC5=CC6=C(OCO6)C(OC6=C(OC)C=C7CCN(C)C(CC(C=C1)=C2)C7=C6)=C45)C=C3	Neg	PMID: 27350107	Pubmed	Collected by the present study
171	Diosmin	COC1=C(O)C=C(C=C1)C1=CC(=O)C2=C(O)C=C(OC3OC(COC4OC(C)C(O)C(O)C4O)C(O)C(O)C3O)C=C2O1	Neg	PMID: 26858648	Pubmed	Collected by the present study
172	Crenatoside	CC1OC(OC2C(OC(=O)C=CC3=CC(O)=C(O)C=C3)C(CO)OC3OCC(OC23)C2=CC(O)=C(O)C=C2)C(O)C(O)C1O	Neg	PMID: 29616383	Pubmed	Collected by the present study
173	Ginsenoside Rh2	CC(C)=CCCC(C)(O)C1CCC2(C)C1C(O)CC1C3(C)CCC(OC4OC(CO)C(O)C(O)C4O)C(C)(C)C3CCC21C	Neg	PMID: 26006028	Pubmed	Collected by the present study
174	Calenduloside E	CC1(C)CCC2(CCC3(C)C(=CCC4C5(C)CCC(OC6OC(C(O)C(O)C6O)C(O)=O)C(C)(C)C5CCC34C)C2C1)C(O)=O	Neg	DOI: 10.15991/j.cnki.41-1361/r.2011.04.006	CNKI	Collected by the present study
175	1,2,6-Tri-O-Galloyl-Beta-D-Glucopyranose	OC1OC(COC(=O)C2=CC(O)=C(O)C(O)=C2)C(OC(=O)C2=CC(O)=C(O)C(O)=C2)C1(O)COC(=O)C1=CC(O)=C(O)C(O)=C1	Neg	DOI: 10.3969/j.issn.1672-4992.2018.16.037	CNKI	Collected by the present study
176	Neogambogic Acid	CC(C)=CCCC1(C)CC(O)C2=C(O)C3=C(OC45C6CC(C=C4C3=O)C(=O)C5(CC=C(C)C(O)=O)OC6(C)C)C(CC=C(C)C)=C2O1	Neg	DOI: 10.3969/j.issn.1001-1978.2012.03.032	CNKI	Collected by the present study
177	Arjunetin	CC1(C)CCC2(CCC3(C)C(=CCC4C5(C)CC(O)C(O)C(C)(C)C5CCC34C)C2C1O)C(=O)OC1OC(CO)C(O)C(O)C1O	Neg	PMID: 22136107	Pubmed	Collected by the present study
178	2-Bromo-α-Ergocryptine	CC(C)CC1N2C(=O)C(NC(=O)C3CN(C)C4CC5=C(Br)NC6=CC=CC(=C56)C4=C3)(OC2(O)C2CCCN2C1=O)C(C)C	Neg	PMID: 23524937	Pubmed	Collected by the present study
179	Fucoxanthin	CC(=O)OC1CC(C)(C)C(=C=CC(C)=CC=CC(C)=CC=CC=C(C)C=CC=C(C)C(=O)CC23OC2(C)CC(O)CC3(C)C)C(C)(O)C1	Neg	DOI: 10.3969/j.issn.1005-5304.2018.06.033	CNKI	Collected by the present study
180	Stachyose	OCC1OC(CO)(OC2OC(COC3OC(COC4OC(CO)C(O)C(O)C4O)C(O)C(O)C3O)C(O)C(O)C2O)C(O)C1O	Neg	PMID: 17490493	Pubmed	Collected by the present study
181	Hydrangeside D,Hydrangeside C	[H]C(CO)(OC1=C(OC)C=C(C=CC(=O)OC2OC(OC3=CC=C4C=CC(=O)OC4=C3)C(O)C(O)C2O)C=C1)C(O)C1=CC=C(O)C(OC)=C1	Neg	PMID: 26333346	Pubmed	Collected by the present study
182	Specnuezhenide	COC(=O)C1=COC(OC2OC(CO)C(O)C(O)C2O)C(=CC)C1CC(=O)OCC1OC(OCCC2=CC=C(O)C=C2)C(O)C(O)C1O	Neg	1008-049X(2017)09-1638-05	CNKI	Collected by the present study
183	Secoisolariciresinol Diglucoside	COC1=C(O)C=CC(CC(COC2OC(CO)C(O)C(O)C2O)C(COC2OC(CO)C(O)C(O)C2O)CC2=CC(OC)=C(O)C=C2)=C1	Neg	1008-049X(2018)03-0477-04	CNKI	Collected by the present study
184	1-O-β-D-Glucopyranosyl-(2S,3R,4E,8Z)-2-N-Palmitoyloctadecasphinga-4,8-Dienine	CCCCCCCCCCCCCCCC(=O)NC(COC1OC(CO)C(O)C(O)C1O)C(O)C=CCCC=CCCCCCCCCC	Neg	PMID: 19844860	Pubmed	Collected by the present study
185	Pinocembrin-7-O-[3"-O-Galloyl-4",6"-Hexahydroxydiphenoyl]-β- Glucose (Pghg)	[H]C12COC(=O)C3=CC(O)=C(O)C(O)=C3C3=C(O)C(O)=C(O)C=C3C(=O)C1([H])C(O)C(O)C(OC1=CC(O)=C3C(=O)CC(OC3=C1)C1=CC=CC=C1)O2	Neg	PMID: 29932194	Pubmed	Collected by the present study
186	Manassantin B	COC1=C(OC)C=C(C=C1)C(O)C(C)OC1=C(OC)C=C(C=C1)C1OC(C(C)C1C)C1=CC(OC)=C(OC(C)C(O)C2=CC3=C(OCO3)C=C2)C=C1	Neg	-	CNKI	Collected by the present study
187	Salvianolic Acid B	OC(=O)C(CC1=CC(O)=C(O)C=C1)OC(=O)C=CC1=C2C(C(OC2=C(O)C=C1)C1=CC(O)=C(O)C=C1)C(=O)OC(CC1=CC(O)=C(O)C=C1)C(O)=O	Neg	PMID: 26828466	Pubmed	Collected by the present study
188	Colocynthin	CC(=O)OC(C)(C)C=CC(=O)C(C)(O)C1C(O)CC2(C)C3CC=C4C(C=C(OC5OC(CO)C(O)C(O)C5O)C(=O)C4(C)C)C3(C)C(=O)CC12C	Neg	PMID: 22136107	Pubmed	Collected by the present study
189	Azadirachtin	COC(=O)C1(O)OCC23C4C(OCC4(C(CC2OC(=O)C(C)=CC)OC(C)=O)C(=O)OC)C(O)C(C)(C13)C12OC1(C)C1CC2OC2OC=CC12O	Neg	PMID: 21595500	Pubmed	Collected by the present study
190	Thonningianin B	OC1C(O)C2OC(=O)C3=CC(O)=C(O)C(O)=C3C3=C(O)C(O)=C(O)C=C3C(=O)OCC2OC1OC1=CC(O)=C(C(=O)CCC2=CC=CC=C2)C(O)=C1	Neg	PMID: 29932194	Pubmed	Collected by the present study
191	Manassantin A	COC1=C(OC)C=C(C=C1)C(O)C(C)OC1=C(OC)C=C(C=C1)C1OC(C(C)C1C)C1=CC(OC)=C(OC(C)C(O)C2=CC(OC)=C(OC)C=C2)C=C1	Neg	-	CNKI	Collected by the present study
192	Polyphyllin D	CC1C2(CCC(C)CO2)OC2CC3C4CC=C5CC(CCC5(C)C4CCC3(C)C12O)OC1OC(CO)C(O)C(O)C1OC1OC(C)C(O)C(O)C1O	Neg	PMID: 26828466	Pubmed	Collected by the present study
193	Troxerutin	CC1OC(OCC2OC(OC3=C(OC4=CC(OCCO)=CC(O)=C4C3=O)C3=CC(OCCO)=C(OCCO)C=C3)C(O)C(O)C2O)C(O)C(O)C1O	Neg	PMID: 27570425	Pubmed	Collected by the present study
194	Liirodendrin	COC1=CC(=CC(OC)=C1OC1OC(CO)C(O)C(O)C1O)C1OCC2C1COC2C1=CC(OC)=C(OC2OC(CO)C(O)C(O)C2O)C(OC)=C1	Neg	PMID: 21595500	Pubmed	Collected by the present study
195	Raddeanin R2	CC1(C)CCC2(CCC3(C)C(=CCC4C5(C)CCC(OC6OCC(O)C(O)C6OC6OC(CO)C(O)C(O)C6O)C(C)(C)C5CCC34C)C2C1)C(O)=O	Neg	1003-3734(2017)11-1259-07	CNKI	Collected by the present study
196	Ginsenoside Rg5	CC(C)=CCC=C(C)C1CCC2(C)C1C(O)CC1C3(C)CCC(OC4OC(CO)C(O)C(O)C4OC4OC(CO)C(O)C(O)C4O)C(C)(C)C3CCC21C	Neg	PMID: 28930143	Pubmed	Collected by the present study
197	Ginsenoside Rk1	CC(C)=CCCC(=C)C1CCC2(C)C1C(O)CC1C3(C)CCC(OC4OC(CO)C(O)C(O)C4OC4OC(CO)C(O)C(O)C4O)C(C)(C)C3CCC21C	Neg	-	CNKI	Collected by the present study
198	Bacoside A	CC(C)=CCCC(C)(O)C1C2CCC3C(C)(CCC4C(C)(C)C(CCC34CO)OC3OC(CO)C(OC4OCC(O)C(O)C4O)C(O)C3O)C2(C)CC1=O	Neg	PMID: 29953177	Pubmed	Collected by the present study
199	Ginsenoside Rg2	CC1OC(OC2C(O)C(O)C(CO)OC2OC2CC3(C)C(CC(O)C4C(CCC34C)C(C)(O)CCC=C(C)C)C3(C)CCC(O)C(C)(C)C23)C(O)C(O)C1O	Neg	PMID: 26006028	Pubmed	Collected by the present study
200	Ginsenoside Rg3	CC(C)=CCCC(C)(O)C1CCC2(C)C1C(O)CC1C3(C)CCC(OC4OC(CO)C(O)C(O)C4OC4OC(CO)C(O)C(O)C4O)C(C)(C)C3CCC21C	Neg	PMID: 26828466	Pubmed	Collected by the present study
201	Echinacoside	CC1OC(OC2C(O)C(OCCC3=CC(O)=C(O)C=C3)OC(COC3OC(CO)C(O)C(O)C3O)C2OC(=O)C=CC2=CC(O)=C(O)C=C2)C(O)C(O)C1O	Neg	PMID: 26941826	Pubmed	Collected by the present study
202	Phosphatidylcholine	CCCCCCCCCCCCCCCCCC(=O)OCC(COP([O-])(=O)OCC[N+](C)(C)C)OC(=O)CCCCCCCC=CCCCCCCCC	Neg	PMID: 28650205	Pubmed	Collected by the present study
203	1,2,4,6-Tetra-O-Galloyl-β-D-Glucose	OC1C(COC(=O)C2=CC(O)=C(O)C(O)=C2)OC(OC(=O)C2=CC(O)=C(O)C(O)=C2)C(OC(=O)C2=CC(O)=C(O)C(O)=C2)C1OC(=O)C1=CC(O)=C(O)C(O)=C1	Neg	PMID: 27350107	Pubmed	Collected by the present study
204	Celosin A	CC1(C)CCC2(CCC3(C)C(=CCC4C5(C)CC(O)C(OC6OC(C(O)C(O)C6OC6OCC(O)C(O)C6O)C(O)=O)C(C)(C=O)C5CCC34C)C2C1)C(O)=O	Neg	PMID: 21595500	Pubmed	Collected by the present study
205	Calenduloside F	CC1(C)CCC2(CCC3(C)C(=CCC4C5(C)CCC(OC6OC(C(O)C(O)C6O)C(O)=O)C(C)(C)C5CCC34C)C2C1)C(=O)OC1OC(CO)C(O)C(O)C1O	Neg	DOI: 10.11724/jdmu.2015.04.01	CNKI	Collected by the present study
206	Astragaloside Ii	CC(=O)OC1C(O)C(O)COC1OC1CCC23CC22CCC4(C)C(C(O)CC4(C)C2CC(OC2OC(CO)C(O)C(O)C2O)C3C1)C1(C)CCC(O1)C(C)(C)O	Neg	1674-5515(2012)06-0624-05	CNKI	Collected by the present study
207	Ginsenoside Rg1	CC(C)=CCCC(C)(OC1OC(CO)C(O)C(O)C1O)C1CCC2(C)C1C(O)CC1C3(C)CCC(O)C(C)(C)C3C(CC21C)OC1OC(CO)C(O)C(O)C1O	Neg	PMID: 27570425	Pubmed	Collected by the present study
208	Ginsenoside Rf	CC(C)=CCCC(C)(O)C1CCC2(C)C1C(O)CC1C3(C)CCC(O)C(C)(C)C3C(CC21C)OC1OC(CO)C(O)C(O)C1OC1OC(CO)C(O)C(O)C1O	Neg	PMID: 26006028	Pubmed	Collected by the present study
209	Stevioside	CC12CCCC(C)(C1CCC13CC(=C)C(C1)(CCC23)OC1OC(CO)C(O)C(O)C1OC1OC(CO)C(O)C(O)C1O)C(=O)OC1OC(CO)C(O)C(O)C1O	Neg	DOI: 10.19540/j.cnki.cjcmm.20170121.021	CNKI	Collected by the present study
210	3-Deacetyl-3-Cinnamoylazadirachtin	[H]OC1([H])C2([H])OC([H])([H])C3(C(=O)OC([H])([H])[H])C2([H])C2(C([H])([H])OC(O[H])(C(=O)OC([H])([H])[H])C2([H])C1(C([H])([H])[H])C12OC1(C([H])([H])[H])C1([H])C([H])([H])C2([H])OC2([H])OC([H])=C([H])C12O[H])C([H])(OC(=O)C(=C([H])C([H])([H])[H])C([H])([H])[H])C([H])([H])C3([H])OC(=O)C([H])=C([H])C1=C([H])C([H])=C([H])C([H])=C1[H]	Neg	PMID: 27350107	Pubmed	Collected by the present study
211	Ginsenoside Rs4	CC(C)=CCC=C(C)C1CCC2(C)C1C(O)CC1C3(C)CCC(OC4OC(CO)C(O)C(O)C4OC4OC(COC(C)=O)C(O)C(O)C4O)C(C)(C)C3CCC21C	Neg	PMID: 28930143	Pubmed	Collected by the present study
212	Hydrangeside A	CC(CC=CCC(C)C(=O)OC1OC(OC2=CC=C3C=CC(=O)OC3=C2)C(O)C(O)C1O)C(=O)OCC1OC(OC2=CC3=C(C=CC(=O)O3)C=C2)C(CO)C(O)C1O	Neg	PMID: 26333346	Pubmed	Collected by the present study
213	Fatsioside A	[H]C1(CCC2(C)C([H])(CCC3(C)C2([H])CC(=O)C2([H])C(O)C(C)(CCC(=O)C(C)C)CC(O)C32C)C1(C)C)OC1OC(CO)C(O)C(O)C1OC1OC(CO)C(O)C(O)C1O	Neg	PMID: 29616383	Pubmed	Collected by the present study
214	Verbascose	OCC1OC(CO)(OC2OC(COC3OC(COC4OC(COC5OC(CO)C(O)C(O)C5O)C(O)C(O)C4O)C(O)C(O)C3O)C(O)C(O)C2O)C(O)C1O	Neg	PMID: 17490493	Pubmed	Collected by the present study
215	Polyphyllin I	CC1C2C(CC3C4CC=C5CC(CCC5(C)C4CCC23C)OC2OC(CO)C(OC3OC(CO)C(O)C3O)C(O)C2OC2OC(C)C(O)C(O)C2O)OC11CCC(C)CO1	Neg	PMID: 29616383	Pubmed	Collected by the present study
216	Polyphyllin Ⅱ	CC1C2C(CC3C4CC=C5CC(CCC5(C)C4CCC23C)OC2OC(CO)C(OC3OC(CO)C(O)C3O)C(OC3OC(C)C(O)C(O)C3O)C2O)OC11CCC(C)CO1	Neg	-	CNKI	Collected by the present study
217	Solamargine	CC1C2C(CC3C4CC=C5CC(CCC5(C)C4CCC23C)OC2OC(CO)C(OC3OC(C)C(O)C(O)C3O)C(O)C2OC2OC(C)C(O)C(O)C2O)OC11CCC(C)CN1	Neg	PMID: 26828466	Pubmed	Collected by the present study
218	Solanine	CC1C2CCC(C)CN2C2CC3C4CC=C5CC(CCC5(C)C4CCC3(C)C12)OC1OC(CO)C(O)C(OC2OC(CO)C(O)C(O)C2O)C1OC1OC(C)C(O)C(O)C1O	Neg	1003-3734(2017)11-1259-07	CNKI	Collected by the present study
219	Indioside I	CC1C2C(CC3C4CCC5CC(CCC5(C)C4CCC23C)OC2OC(CO)C(OC3OC(C)C(O)C(O)C3O)C(O)C2OC2OC(C)C(O)C(O)C2O)OC11CCC(C)CO1	Neg	DOI: 10.4268/cjcmm20110727	CNKI	Collected by the present study
220	Thonningianin A	OC1C(OC2=CC(O)=C(C(=O)CCC3=CC=CC=C3)C(O)=C2)OC2COC(=O)C3=CC(O)=C(O)C(O)=C3C3=C(O)C(O)=C(O)C=C3C(=O)OC2C1OC(=O)C1=CC(O)=C(O)C(O)=C1	Neg	PMID: 26828466	Pubmed	Collected by the present study
221	Cordifoliside E	COC1=CC(C=CC(=O)OCC2OC(COC(C)=O)(OC3OC(COC(C)=O)C(OC(C)=O)C(O)C3OC(C)=O)C(OC(=O)C=CC3=CC(OC)=C(O)C=C3)C2O)=CC(OC)=C1O	Neg	PMID: 21595500	Pubmed	Collected by the present study
222	Raddeanin A	CC1OC(OC2C(O)C(O)C(CO)OC2OC2C(O)C(O)COC2OC2CCC3(C)C(CCC4(C)C3CC=C3C5CC(C)(C)CCC5(CCC43C)C(O)=O)C2(C)C)C(O)C(O)C1O	Neg	PMID: 26828466	Pubmed	Collected by the present study
223	Bacopasaponin-C	CC(C)=CC1COC23CC4(CO2)C(CCC2C5(C)CCC(OC6OCC(O)C(OC7OC(CO)C(O)C(O)C7O)C6OC6OC(CO)C(O)C6O)C(C)(C)C5CCC42C)C3C1(C)O	Neg	PMID: 27441247	Pubmed	Collected by the present study
224	Podophyllin	COC1=CC(=CC(OC)=C1OC)C1C(C(CO)C(O)C2=CC3=C(OCO3)C=C12)C(O)=O	Neg	PMID: 22136107	Pubmed	Collected by the present study
225	Sennosides	OCC1OC(OC2=CC=CC3=C2C(=O)C2=C(C=C(C=C2O)C(O)=O)C3C2C3=C(C(OC4OC(CO)C(O)C(O)C4O)=CC=C3)C(=O)C3=C2C=C(C=C3O)C(O)=O)C(O)C(O)C1O	Pos	PMID: 24021288	Pubmed	Collected by the present study
226	Atractyloside	CC(C)CC(=O)OC1C(OC2CC(C3CCC45CC(CCC4C3(C)C2)C(=C)C5O)C(O)=O)OC(CO)C(OS(O)(=O)=O)C1OS(O)(=O)=O	Pos	PMID: 24021288	Pubmed	Collected by the present study
227	Phalloidin	CC(O)C1NC(=O)C(C)NC(=O)C(CC(C)(O)CO)NC(=O)C2CC3=C(NC4=CC=CC=C34)SCC(NC1=O)C(=O)N1CC(O)CC1C(=O)NC(C)C(=O)N2	Pos	PMID: 24021288	Pubmed	Collected by the present study
228	Carboxy-Atractyloside	CC(C)CC(=O)OC1C(OC2CC3(C)C4CCC5CC4(CCC3C(C2)(C(O)=O)C(O)=O)C(O)C5=C)OC(CO)C(OS(O)(=O)=O)C1OS(O)(=O)=O	Pos	PMID: 24021288	Pubmed	Collected by the present study
229	Ampelopsin C	OC1=CC=C(C=C1)C1OC2=CC(O)=C3C(C(C4C(C5=CC=C(O)C=C5)C5=C(O)C=C(O)C=C5C1C2=C34)C1=CC(O)=CC(O)=C1)C1=CC=C(O)C=C1	Pos	1003-3734(2016)23-2647-06	CNKI	Collected by the present study
230	Polygonumnolide C2	CC1=CC(O)=C2C(=O)C3=C(O)C=C(O)C=C3C(C3C4=CC(C)=CC(O)=C4C(=O)C4=C(OC5OC(CO)C(O)C(O)C5O)C=C(O)C=C34)C2=C1	Pos	DOI: 10.16155/j.0254-1793.2018.02.11	CNKI	Collected by the present study
231	Aconitine	CCN1CC2(COC)C3C(OC)C4C1C3(C1CC3(O)C(OC(=O)C5=CC=CC=C5)C1C4(OC(C)=O)C(O)C3OC)C(CC2O)OC	Pos	PMID: 28078299	Pubmed	Collected by the present study
232	Trichilinin D	CC(=O)OC1CC2C3(C)C4C(OCC4(C)C(O)CC3OC(=O)C=CC3=CC=CC=C3)C(O)C2(C)C2=CCC(C3=COC=C3)C12C	Pos	DOI: 10.4268/cjcmm20161715	CNKI	Collected by the present study
233	1-O-Tigloy-1-O-Debenzoylohchinal	[H]C12OCC3(C)C1C(C)(C(O)CC3([H])OC(C)=O)C1CC([H])(OCC)OC3CC(C(C)=C3C1(C)C2([H])OC(=O)C(C)=CC)C1=COC=C1	Pos	DOI: 10.4268/cjcmm20161715	CNKI	Collected by the present study
234	Astin B	CCC1NC(=O)CC(NC(=O)C(CO)NC(=O)C(NC(=O)C2C(Cl)C(Cl)CN2C1=O)C(C)O)C1=CC=CC=C1	Pos	PMID: 30217028	Pubmed	Collected by the present study
235	Isotoosendanin	CC(=O)OC1CC(O)C23COC(O)C1(C)C2CC(O)C1(C)C2C(=O)CC(C4=COC=C4)C2(C)C(OC(C)=O)C(=O)C31	Pos	DOI: http://dx.doi. org/10.11569/wcjd.v26.i21.1273	CNKI	Collected by the present study
236	Hyperforin	CC(C)C(=O)C12C(=O)C(CC=C(C)C)=C(O)C(CC=C(C)C)(CC(CC=C(C)C)C1(C)CCC=C(C)C)C2=O	Pos	PMID: 29117101	Pubmed	Collected by the present study
237	Emodin Dianthrone	CC1=CC(O)=C2C(=O)C3=C(O)C=C(O)C=C3C(C3C4=CC(C)=CC(O)=C4C(=O)C4=C(O)C=C(O)C=C34)C2=C1	Pos	DOI: 10.16155/j.0254-1793.2018.02.11	CNKI	Collected by the present study
238	Salvianolic Acid A	OC(=O)C(CC1=CC(O)=C(O)C=C1)OC(=O)C=CC1=C(C=CC2=CC(O)=C(O)C=C2)C(O)=C(O)C=C1	Pos	PMID: 24879982	Pubmed	Collected by the present study
239	Meliasenin B	CC(C)=CCCC1C2C(CC3(C)C4=CC(=O)C5C(C)(C)C(O)CCC5(C)C4CCC23C)OC1=O	Pos	DOI: 10.4268/cjcmm20161715	CNKI	Collected by the present study
240	Ligularine	CC=C1C(OC(C)=O)C(C)C(C)(OC(C)=O)C(=O)OCC2=CC[N+]3(C)CCC(OC1=O)C23O	Pos	PMID: 25660478	Pubmed	Collected by the present study
241	Axillaridine A	CC(C1CCC2C3CCC4C(=O)C(NC(=O)C5=CC=CC=C5)=CCC4(C)C3CCC12C)N(C)C	Pos	PMID: 25660478	Pubmed	Collected by the present study
242	Doronine	CC(Cl)C1(O)CC(C)C(C)(OC(C)=O)C(=O)OCC2=CCN(C)CCC(OC1=O)C2=O	Pos	PMID: 25660478	Pubmed	Collected by the present study
243	Epigallocatechin Galate	OC1=CC(O)=C2CC(OC(=O)C3=CC(O)=C(O)C(O)=C3)C(OC2=C1)C1=CC(O)=C(O)C(O)=C1	Pos	PMID: 25660478	Pubmed	Collected by the present study
244	Kulactone	CC(C)=CCCC1C2C(CC3(C)C4=CCC5C(C)(C)C(=O)CCC5(C)C4CCC23C)OC1=O	Pos	DOI: 10.3969/j.issn.2095-3097.2015.04.015	CNKI	Collected by the present study
245	Cyprinol	CC(CCCC(CO)CO)C1CCC2C3C(O)CC4CC(O)CCC4(C)C3CC(O)C12C	Pos	PMID: 19615308	Pubmed	Collected by the present study
246	Atractyloside A	CC(C)(OC1OC(CO)C(O)C(O)C1O)C1CCC(O)(CO)C2CC(=O)C(C)(O)C2C1	Pos	DOI: 10.4268/cjcmm20161715	CNKI	Collected by the present study
247	Floridanine	CC(O)C1(O)CC(C)C(C)(OC(C)=O)C(=O)OCC2=CCN(C)CCC(OC1=O)C2=O	Pos	PMID: 25660478	Pubmed	Collected by the present study
248	4,9-dihydroxy-4,9-diisopropyl-8-methyl-2,7,11-trioxa-16-azatricyclo[11.5.1.0¹⁶,¹⁹]nonadec-13-ene-3,6,10-trione	CC(C)C1(O)CC(=O)OC(C)C(O)(C(C)C)C(=O)OCC2=CCN3CCC(OC1=O)C23	Pos	PMID: 25660478	Pubmed	Collected by the present study
249	3'-Acetylheliosupine	CC=C(C)C(=O)OC1CCN2CC=C(COC(=O)C(O)(C(C)OC(C)=O)C(C)(C)O)C12	Pos	PMID: 25660478	Pubmed	Collected by the present study
250	Hemerocallin	CC(=O)C1=C(C)C=C2C=CC(=C(O)C2=C1O)C1=C(O)C2=C(O)C(C(C)=O)=C(C)C=C2C=C1	Pos	1009-5519(2005)04-0379-02	CNKI	Collected by the present study
251	Kurarinone	COC1=CC(O)=C(CC(CC=C(C)C)C(C)=C)C2=C1C(=O)CC(O2)C1=C(O)C=C(O)C=C1	Pos	-	CNKI	Collected by the present study
252	Norkurarinone	CC(C)=CCC(CC1=C(O)C=C(O)C2=C1OC(CC2=O)C1=C(O)C=C(O)C=C1)C(C)=C	Pos	-	CNKI	Collected by the present study
253	Oxalicumone A	COC(=O)C(O)CC(O)(C1CC2=C(OC3=C(C(O)=CC(C)=C3)C2=O)S1)C(=O)OC	Pos	PMID: 30217028	Pubmed	Collected by the present study
254	Florosenine	CC1OC11CC(C)C(C)(OC(C)=O)C(=O)OCC2=CCN(C)CCC(OC1=O)C2=O	Pos	PMID: 25660478	Pubmed	Collected by the present study
255	(-)-Lasiocarpine	COC(C)C(O)(C(=O)OCC1=CCN2CCC(OC(=O)C(C)=CC)C12)C(C)(C)O	Pos	PMID: 25660478	Pubmed	Collected by the present study
256	Acetylsenkirkine，Ligularidine	CC=C1CC(C)C(C)(OC(C)=O)C(=O)OCC2=CCN(C)CCC(OC1=O)C2=O	Pos	PMID: 25660478	Pubmed	Collected by the present study
257	Clivorine	CC1C=C(C=C)C(=O)OC2CC[N+]3(C)CC=C(COC(=O)C1(C)OC(C)=O)C23[O-]	Pos	PMID: 25660478	Pubmed	Collected by the present study
258	Cyclovirobuxin D	CNC(C)C1C(O)CC2(C)C3CCC4C5(CC35CCC12C)CCC(NC)C4(C)C	Pos	DOI: 10.13664/j.cnki.pcr.2012.02.009	CNKI	Collected by the present study
259	Bafoudiosbulbin A	COC(=O)C1CC2CC3C4(C)CC(OC44CC(OC4=O)C13C(=O)O2)C1=COC=C1	Pos	PMID: 26355537	Pubmed	Collected by the present study
260	Schisandrin B	COC1=C(OC)C(OC)=C2C(CC(C)C(C)CC3=CC4=C(OCO4)C(OC)=C23)=C1	Pos	PMID: 25926716	Pubmed	Collected by the present study
261	Isoline	CCC1(O)CC(C)C(C)(OC(C)=O)C(=O)OCC2=CCN3CCC(OC1=O)C23	Pos	PMID: 25660478	Pubmed	Collected by the present study
262	Deguelin	COC1=C(OC)C=C2C3C(COC2=C1)OC1=C(C=CC2=C1C=CC(C)(C)O2)C3=O	Pos	1009-5519(2005)04-0379-02	CNKI	Collected by the present study
263	Tylophorine	COC1=C(OC)C=C2C(=C1)C1=C(CN3CCCC3C1)C1=CC(OC)=C(OC)C=C21	Pos	1009-5519(2005)04-0379-02	CNKI	Collected by the present study
264	Latifoline	CC=C(C)C(=O)OC1CCN2CC=C(COC(=O)C3(O)C(C)OC(=O)C3C)C12	Pos	PMID: 25660478	Pubmed	Collected by the present study
265	Senaetnine	CC=C1CC(C)C(C)(OC(C)=O)C(=O)OCC2=C3C(CC(=O)N3C=C2)OC1=O	Pos	PMID: 25660478	Pubmed	Collected by the present study
266	8-Epidiosbulbin E Acetate	CC(=O)OC1CC2C(=O)OC(CC2(C)C2CC3CC(C12)C(=O)O3)C1=COC=C1	Pos	-	CNKI	Collected by the present study
267	Bafoudiosbulbins B	OC12CCC34C5CC(CC3C1(COC4=O)CC(OC2=O)C1=COC=C1)OC5=O	Pos	PMID: 26355537	Pubmed	Collected by the present study
268	Jaconine	CC(Cl)C1(O)CC(C)C(C)(O)C(=O)OCC2=CCN3CCC(OC1=O)C23	Pos	PMID: 25660478	Pubmed	Collected by the present study
269	Syneilesine	CCC1C(O)C(C)C(C)(O)C(=O)OCC2=CCN(C)CCC(OC1=O)C2=O	Pos	PMID: 25660478	Pubmed	Collected by the present study
270	Heterophylline	COC(=O)C1=COC(C)C2CN3CCC4=C(NC5=C4C=C(OC)C=C5)C3CC12	Pos	PMID: 25660478	Pubmed	Collected by the present study
271	Hydroxysenkirkine	CC=C1CC(C)C(O)(CO)C(=O)OCC2=CC[N+]3(C)CCC(OC1=O)C23O	Pos	PMID: 25660478	Pubmed	Collected by the present study
272	Symphytine，Symlandine	CC=C(C)C(=O)OC1CCN2CC=C(COC(=O)C(O)(C(C)C)C(C)O)C12	Pos	PMID: 29782898, PMID: 25660478	Pubmed	Collected by the present study
273	Petasitenine，Otosenine	CC1OC11CC(C)C(C)(O)C(=O)OCC2=CCN(C)CCC(OC1=O)C2=O	Pos	PMID: 25660478	Pubmed	Collected by the present study
274	Retusamine	CCC12C(C)C(C)(OC1=O)C(=O)OCC1=CC[N+]3(C)CCC(OC2=O)C13O	Pos	PMID: 25660478	Pubmed	Collected by the present study
275	Diosbulbin F	COC(=O)C1CC(O)CC2C1C(=O)CC1C(=O)OC(CC21C)C1=COC=C1	Pos	-	CNKI	Collected by the present study
276	Diosbulbin A	COC(=O)C1CC(O)CC2C1C1CC3(OC(CC23C)C2=COC=C2)C(=O)O1	Pos	-	CNKI	Collected by the present study
277	Jacoline	CC(O)C1(O)CC(C)C(C)(O)C(=O)OCC2=CCN3CCC(OC1=O)C23	Pos	PMID: 25660478	Pubmed	Collected by the present study
278	Sceleratine	CC1C(C)C(O)(CO)C(=O)OC2CCN3CC=C(COC(=O)C1(C)O)C23	Pos	PMID: 25660478	Pubmed	Collected by the present study
279	Axillarine	CC(C)C1C(O)C(O)(C(C)O)C(=O)OCC2=CCN3CCC(OC1=O)C23	Pos	PMID: 25660478	Pubmed	Collected by the present study
280	Crosemperine	CC(C)C1C(C)C(C)(O)C(=O)OCC2=CC[N+]3(C)CCC(OC1=O)C23O	Pos	PMID: 25660478	Pubmed	Collected by the present study
281	Retrorsine N-Oxide	CC=C1CC(C)C(O)(CO)C(=O)OCC2=CC[N+]3([O-])CCC(OC1=O)C23	Pos	1003-3734(2016)23-2647-06	CNKI	Collected by the present study
282	Emiline	CCC1CC(=C)C(C)(O)C(=O)OCC2=CC[N+]3(C)CCC(OC1=O)C23O	Pos	PMID: 25660478	Pubmed	Collected by the present study
283	Adonifoline	CC1OCC23CC1(O)C(=O)OC1CCN4CC=C(COC(=O)C2(C)O3)C14	Pos	DOI: 10.3969/j.issn.1008-0805.2013.03.093	CNKI	Collected by the present study
284	Riddelliine N-Oxide	CC=C1CC(=C)C(O)(CO)C(=O)OCC2=CC[N+]3([O-])CCC(OC1=O)C23	Pos	PMID: 29782898	Pubmed	Collected by the present study
285	Diosbulbin C	CC12CC(OC11CC(OC1=O)C1C(CC(O)CC21)C(O)=O)C1=COC=C1	Pos	-	CNKI	Collected by the present study
286	Retusine	COC1=CC(O)=C2C(=O)C(OC)=C(OC2=C1)C1=CC(OC)=C(OC)C=C1	Pos	PMID: 25660478	Pubmed	Collected by the present study
287	Uplandicine	CC(O)C(O)(C(=O)OCC1=CCN2CCC(OC(C)=O)C12)C(C)(C)O	Pos	PMID: 25660478	Pubmed	Collected by the present study
288	Tetrahydropalmatine	COC1=C(OC)C=C2C3CC4=C(CN3CCC2=C1)C(OC)=C(OC)C=C4	Pos	PMID: 27890005	Pubmed	Collected by the present study
289	Chlorogenic Acid	OC1CC(O)(CC(OC(=O)C=CC2=CC(O)=C(O)C=C2)C1O)C(O)=O	Pos	DOI: 10.11842/wst.2014.01.008	CNKI	Collected by the present study
290	Trichodesmine	CC(C)C1C(=O)OC2CCN3CC=C(COC(=O)C(C)(O)C1(C)O)C23	Pos	PMID: 24645695	Pubmed	Collected by the present study
291	Rosmarinine	CC=C1CC(C)C(C)(O)C(=O)OCC2C(O)CN3CCC(OC1=O)C23	Pos	PMID: 25660478	Pubmed	Collected by the present study
292	Chelidonine	CN1CC2=C(C=CC3=C2OCO3)C2C(O)CC3=CC4=C(OCO4)C=C3C12	Pos	PMID: 27012588	Pubmed	Collected by the present study
293	Senecionine N-Oxide	CC=C1CC(C)C(C)(O)C(=O)OCC2=CC[N+]3([O-])CCC(OC1=O)C23	Pos	PMID: 29782898	Pubmed	Collected by the present study
294	Crotalaburnine	CC=C1CC(C)C(C)(O)C(=O)OCC2=CCN3CC(O)C(OC1=O)C23	Pos	PMID: 25660478	Pubmed	Collected by the present study
295	Madurensine	CC=C1CC(C)C(C)(O)C(=O)OCC2=CCN3CC(OC1=O)C(O)C23	Pos	PMID: 25660478	Pubmed	Collected by the present study
296	Swazine	CC1C(=C)C(=O)OC2CCN3CC=C(COC(=O)C(C)(O)C11CO1)C23	Pos	PMID: 25660478	Pubmed	Collected by the present study
297	Seneciphylline N-Oxide	CC=C1CC(=C)C(C)(O)C(=O)OCC2=CC[N+]3([O-])CCC(OC1=O)C23	Pos	PMID: 24645695	Pubmed	Collected by the present study
298	Jacozine	CC1OC11CC(=C)C(C)(O)C(=O)OCC2=CCN3CCC(OC1=O)C23	Pos	PMID: 25660478	Pubmed	Collected by the present study
299	Riddelline	CC=C1CC(=C)C(O)(CO)C(=O)OCC2=CCN3CCC(OC1=O)C23	Pos	PMID: 25660478	Pubmed	Collected by the present study
300	Nitidine	COC1=C(OC)C=C2C(=C1)C=[N+](C)C1=C2C=CC2=CC3=C(OCO3)C=C12	Pos	DOI: 10.3969/j.issn.1008-0805.2013.03.093	CNKI	Collected by the present study
301	Chelerythrine	COC1=C(OC)C2=C[N+](C)=C3C4=CC5=C(OCO5)C=C4C=CC3=C2C=C1	Pos	PMID: 27012588	Pubmed	Collected by the present study
302	Camptothecin	CCC1(O)C(=O)OCC2=C1C=C1N(CC3=CC4=CC=CC=C4N=C13)C2=O	Pos	1009-5519(2005)04-0379-02	CNKI	Collected by the present study
303	Teucrin A	CC1C(O)C2OC(=O)C3=C2C(CCC3)C11CC(OC1=O)C1=COC=C1	Pos	PMID: 29117101	Pubmed	Collected by the present study
304	Disobulbin-D	CC12CC(OC(=O)C1CC(=O)C1C3CC(CC21)OC3=O)C1=COC=C1	Pos	PMID: 21459083	Pubmed	Collected by the present study
305	Usnic Acid	CC(=O)C1C(=O)C=C2OC3=C(C(C)=O)C(O)=C(C)C(O)=C3C2(C)C1=O	Pos	PMID: 25660478	Pubmed	Collected by the present study
306	7-Acetyllycopsamine	CC(C)C(O)(C(C)O)C(=O)OCC1=CCN2CCC(OC(C)=O)C12	Pos	PMID: 25660478	Pubmed	Collected by the present study
307	Monocrotaline N-Oxide	CC1C(=O)OC2CC[N+]3([O-])CC=C(COC(=O)C(C)(O)C1(C)O)C23	Pos	1003-3734(2016)23-2647-06	CNKI	Collected by the present study
308	Papaverine	COC1=C(OC)C=C(CC2=NC=CC3=CC(OC)=C(OC)C=C23)C=C1	Pos	1009-5519(2005)04-0379-02	CNKI	Collected by the present study
309	Bavachinin	COC1=C(CC=C(C)C)C=C2C(=O)CC(OC2=C1)C1=CC=C(O)C=C1	Pos	PMID: 30217028	Pubmed	Collected by the present study
310	Bulgarsenine	CC1CC(C)=CC(=O)OC2CCN3CCC(COC(=O)C1(C)O)C23	Pos	PMID: 25660478	Pubmed	Collected by the present study
311	Incanine	CC(C)C1C(C)C(C)(O)C(=O)OCC2=CCN3CCC(OC1=O)C23	Pos	PMID: 25660478	Pubmed	Collected by the present study
312	Nemorensine	CC1CC2(C)CC(=O)OC3CCN4CCC(COC(=O)C1(C)O2)C34	Pos	PMID: 25660478	Pubmed	Collected by the present study
313	Neoplatyphylline，Platyphylline	CC=C1CC(C)C(C)(O)C(=O)OCC2CCN3CCC(OC1=O)C23	Pos	PMID: 25660478	Pubmed	Collected by the present study
314	Sarracine	CC=C(C)C(=O)OC1CCN2CCC(COC(=O)C(CO)=CC)C12	Pos	PMID: 25660478	Pubmed	Collected by the present study
315	Berberine	COC1=C(OC)C2=C[N+]3=C(C=C2C=C1)C1=CC2=C(OCO2)C=C1CC3	Pos	-	CNKI	Collected by the present study
316	Doronenine	CC1CC(C)=CC(=O)OC2CCN3CC=C(COC(=O)C1(C)O)C23	Pos	PMID: 25660478	Pubmed	Collected by the present study
317	Spartioidine	CC=C1CC(=C)C(C)(O)C(=O)OCC2=CCN3CCC(OC1=O)C23	Pos	PMID: 25660478	Pubmed	Collected by the present study
318	Sanguinarine	C[N+]1=C2C3=CC4=C(OCO4)C=C3C=CC2=C2C=CC3=C(OCO3)C2=C1	Pos	PMID: 29782898	Pubmed	Collected by the present study
319	Europine	COC(C)C(O)(C(=O)OCC1=CCN2CCC(O)C12)C(C)(C)O	Pos	PMID: 25660478	Pubmed	Collected by the present study
320	Teuchamaedryn A	CC1CC2OC(=O)C3=C2C(CCC3)C11CC(OC1=O)C1=COC=C1	Pos	PMID: 29117101	Pubmed	Collected by the present study
321	Ajmaline	CCC1C2CC3C4N(C)C5=CC=CC=C5C44CC(C2C4O)N3C1O	Pos	PMID: 28078299	Pubmed	Collected by the present study
322	Monocrotaline	CC1C(=O)OC2CCN3CC=C(COC(=O)C(C)(O)C1(C)O)C23	Pos	PMID: 25660478	Pubmed	Collected by the present study
323	Dehydromonocrotaline	CC1C(=O)OC2CCN3C=CC(COC(=O)C(C)(O)C1(C)O)=C23	Pos	PMID: 29117101	Pubmed	Collected by the present study
324	Gelsemine	CN1CC2(C=C)C3CC4OCC3C1C2C41C(=O)NC2=CC=CC=C12	Pos	1009-5519(2005)04-0379-02	CNKI	Collected by the present study
325	Nilgirine	CC=C1CC(C)C(O)C(=O)OCC2=C3C(CCN3CC2)OC1=O	Pos	PMID: 25660478	Pubmed	Collected by the present study
326	Coptisine	C1OC2=C(O1)C=C1C(CC[N+]3=C1C=C1C=CC4=C(OCO4)C1=C3)=C2	Pos	PMID: 27012588	Pubmed	Collected by the present study
327	(-)-Pictamine	CCCCC=CC=CC1CCCC2CCC(OC(C)=O)C(C)N12	Pos	PMID: 25660478	Pubmed	Collected by the present study
328	Triptophenolide	CC(C)C1=C(O)C2=C(C=C1)C1(C)CCC3=C(COC3=O)C1CC2	Pos	1009-5519(2005)04-0379-02	CNKI	Collected by the present study
329	Fulvine	CC1C(=O)OCC2=CCN3CCC(OC(=O)C(C)C1(C)O)C23	Pos	PMID: 25660478	Pubmed	Collected by the present study
330	Linifolin A	CC1CC2OC(=O)C(=C)C2C(OC(C)=O)C2(C)C1C=CC2=O	Pos	PMID: 28905185	Pubmed	Collected by the present study
331	Nordihydroguaiaretic Acid	CC(CC1=CC(O)=C(O)C=C1)C(C)CC1=CC(O)=C(O)C=C1	Pos	PMID: 25660478	Pubmed	Collected by the present study
332	α-Dichroine	OC1(CN2C=NC3=CC=CC=C3C2=O)CC2NCCCC2O1	Pos	1009-5519(2005)04-0379-02	CNKI	Collected by the present study
333	Febrifugine	OC1CCCNC1CC(=O)CN1C=NC2=CC=CC=C2C1=O	Pos	PMID: 28078299	Pubmed	Collected by the present study
334	Rinderine，Intermedine，Indicine，Echinatine，Lycopsamine	CC(C)C(O)(C(C)O)C(=O)OCC1=CCN2CCC(O)C12	Pos	PMID: 25660478	Pubmed	Collected by the present study
335	Heleurine	COC(C)C(O)(C(C)C)C(=O)OCC1=CCN2CCCC12	Pos	PMID: 25660478	Pubmed	Collected by the present study
336	Levo-Tetrahydropalmatine	COC1=C(OC)C2=C(CC3N(CCC4=CC=CC=C34)C2)C=C1	Pos	PMID: 22477279	Pubmed	Collected by the present study
337	Tutin	CC(=C)C1C2OC(=O)C1C1(O)C3OC3C3(CO3)C1(C)C2O	Pos	1009-5519(2005)04-0379-02	CNKI	Collected by the present study
338	Pseudolycorine	COC1=C(O)C=C2C3C4N(CCC4=CC(O)C3O)CC2=C1	Pos	1009-5519(2005)04-0379-02	CNKI	Collected by the present study
339	Dihydrolycorine	OC1CC2CCN3CC4=CC5=C(OCO5)C=C4C(C23)C1O	Pos	DOI: 10.4268/cjcmm20112331	CNKI	Collected by the present study
340	Pipermethystine	CC(=O)OC1CN(C(=O)CCC2=CC=CC=C2)C(=O)C=C1	Pos	PMID: 21377431	Pubmed	Collected by the present study
341	Lycorine	OC1C=C2CCN3CC4=CC5=C(OCO5)C=C4C(C23)C1O	Pos	DOI: 10.4268/cjcmm20112331	CNKI	Collected by the present study
342	Vitamin A	CC(=CCO)C=CC=C(C)C=CC1=C(C)CCCC1(C)C	Pos	PMID: 27070596	Pubmed	Collected by the present study
343	Androstenedione	CC12CCC3C(CCC4=CC(=O)CCC34C)C1CCC2=O	Pos	PMID: 19826971	Pubmed	Collected by the present study
344	Luteolin	OC1=CC(O)=C2C(=O)C=C(OC2=C1)C1=CC(O)=C(O)C=C1	Pos	PMID: 24278574	Pubmed	Collected by the present study
345	Lindelofine，Viridiflorine	CC(C)C(O)(C(C)O)C(=O)OCC1CCN2CCCC12	Pos	PMID: 25660478	Pubmed	Collected by the present study
346	Narwedine	COC1=C2OC3CC(=O)C=CC33CCN(C)CC(C=C1)=C23	Pos	1009-5519(2005)04-0379-02	CNKI	Collected by the present study
347	Piperine	O=C(C=CC=CC1=CC2=C(OCO2)C=C1)N1CCCCC1	Pos	PMID: 29117101	Pubmed	Collected by the present study
348	Flavokawain B	COC1=CC(O)=C(C(=O)C=CC2=CC=CC=C2)C(OC)=C1	Pos	PMID: 20696856	Pubmed	Collected by the present study
349	Physcione	COC1=CC(O)=C2C(=O)C3=C(O)C=C(C)C=C3C(=O)C2=C1	Pos	DOI: http://dx.doi. org/10.11569/wcjd.v26.i21.1273	CNKI	Collected by the present study
350	Rhein	OC(=O)C1=CC(O)=C2C(=O)C3=C(C=CC=C3O)C(=O)C2=C1	Pos	PMID: 27890005	Pubmed	Collected by the present study
351	Supinine，(+)-Cyanustine	CC(C)C(O)(C(C)O)C(=O)OCC1=CCN2CCCC12	Pos	PMID: 25660478	Pubmed	Collected by the present study
352	Hymenoxon	CC1CC2OC(=O)C(=C)C2CC2(C)C(O)OC(O)CC12	Pos	PMID: 28905185	Pubmed	Collected by the present study
353	Linoleic Acid，Chaulmoogric Acid	CCCCCC=CCC=CCCCCCCCC(O)=O	Pos	PMID: 27070596, 1009-5519(2005)04-0379-02	Pubmed, CNKI	Collected by the present study
354	Eleostearic Acid	CCCCC=CC=CC=CCCCCCCCC(O)=O	Pos	1009-5519(2005)04-0379-02	CNKI	Collected by the present study
355	Isoeleostearic Acid	CC(C)CC=CC=CC=CCCCCCCCC(O)=O	Pos	1009-5519(2005)04-0379-02	CNKI	Collected by the present study
356	2-Deoxo-2-(Acetyloxy)-9-Oxoageraphorone	[H]C12CC(OC(C)=O)C(C)=CC1([H])C(C(C)C)C(=O)CC2C	Pos	PMID: 28905185	Pubmed	Collected by the present study
357	Coriamyrtin	CC(=C)C1C2CC3(C)C4(CO4)C4OC4C3(O)C1C(=O)O2	Pos	1009-5519(2005)04-0379-02	CNKI	Collected by the present study
358	Methysticin	COC1=CC(=O)OC(C1)C=CC1=CC2=C(OCO2)C=C1	Pos	PMID: 21459083	Pubmed	Collected by the present study
359	Isoimperatorin	CC(C)=CCOC1=C2C=CC(=O)OC2=CC2=C1C=CO2	Pos	PMID: 27890005	Pubmed	Collected by the present study
360	Imperatorin	CC(C)=CCOC1=C2OC(=O)C=CC2=CC2=C1OC=C2	Pos	PMID: 27890005	Pubmed	Collected by the present study
361	Emodin	CC1=CC(O)=C2C(=O)C3=C(O)C=C(O)C=C3C(=O)C2=C1	Pos	DOI: 10.19540/j.cnki.cjcmm.20161222.051	CNKI	Collected by the present study
362	Aloe Emodin	OCC1=CC(O)=C2C(=O)C3=C(C=CC=C3O)C(=O)C2=C1	Pos	DOI: 10.7501/j.issn.0253-2670.2016.22.015	CNKI	Collected by the present study
363	Apigenin	OC1=CC=C(C=C1)C1=CC(=O)C2=C(O)C=C(O)C=C2O1	Pos	PMID: 24278574	Pubmed	Collected by the present study
364	Geigerinin	CC1CC2OC(=O)C(=C)C2CC2(C)C(O)C(O)CC12	Pos	PMID: 28905185	Pubmed	Collected by the present study
365	6α-Hydroxy-2,3-Dihydroaromaticin	[H]C12CC(C)C3([H])CCC(=O)C3(C)C(O)C1([H])C(=C)C(=O)O2	Pos	PMID: 28905185	Pubmed	Collected by the present study
366	Helenalin，Mexicanin I	CC1CC2OC(=O)C(=C)C2C(O)C2(C)C1C=CC2=O	Pos	PMID: 28905185	Pubmed	Collected by the present study
367	N-Nitrosofenfluramine	CCN(N=O)C(C)CC1=CC(=CC=C1)C(F)(F)F	Pos	PMID: 19615308	Pubmed	Collected by the present study
368	Palmitic Acid	CCCCCCCCCCCCCCCC(O)=O	Pos	1001-5094(2013）11-0545-10	CNKI	Collected by the present study
369	Bakuchiol	CC(C)=CCCC(C)(C=C)C=CC1=CC=C(O)C=C1	Pos	DOI: 10.7501/j.issn.0253-2670.2017.19.028	CNKI	Collected by the present study
370	Chrysophanol	CC1=CC(O)=C2C(=O)C3=C(C=CC=C3O)C(=O)C2=C1	Pos	PMID: 29782898	Pubmed	Collected by the present study
371	Hydnocarpic Acid	OC(=O)CCCCCCCCCCC1CCC=C1	Pos	1009-5519(2005)04-0379-02	CNKI	Collected by the present study
372	Zedoarondiol	CC(C)=C1CC2C(CCC2(C)O)C(C)(O)CC1=O	Pos	PMID: 28905185	Pubmed	Collected by the present study
373	Aerugidiol	CC(C)=C1CC2C(C)(O)CCC2(O)C(C)=CC1=O	Pos	PMID: 28905185	Pubmed	Collected by the present study
374	Telekin	CC12CCCC(=C)C1(O)CC1C(C2)OC(=O)C1=C	Pos	PMID: 28905185	Pubmed	Collected by the present study
375	Reynosin	CC12CCC3C(OC(=O)C3=C)C1C(=C)CCC2O	Pos	PMID: 28905185	Pubmed	Collected by the present study
376	Asperilin	CC12CC3OC(=O)C(=C)C3CC1C(=C)CCC2O	Pos	PMID: 28905185	Pubmed	Collected by the present study
377	Santamarine	CC1=CCC(O)C2(C)CCC3C(OC(=O)C3=C)C12	Pos	DOI: 10.19540/j.cnki.cjcmm.20161222.051	CNKI	Collected by the present study
378	Santonin	CC1C2CCC3(C)C=CC(=O)C(C)=C3C2OC1=O	Pos	1009-5519(2005)04-0379-02	CNKI	Collected by the present study
379	Osthole	COC1=C(CC=C(C)C)C2=C(C=CC(=O)O2)C=C1	Pos	-	CNKI	Collected by the present study
380	Chrysarobin	CC1=CC2=CC3=C(C(O)=CC=C3)C(O)=C2C(O)=C1	Pos	1009-5519(2005)04-0379-02	CNKI	Collected by the present study
381	Chrysazin	OC1=CC=CC2=C1C(=O)C1=C(C=CC=C1O)C2=O	Pos	PMID: 29782898	Pubmed	Collected by the present study
382	Alizarin	OC1=C(O)C2=C(C=C1)C(=O)C1=CC=CC=C1C2=O	Pos	PMID: 29782898	Pubmed	Collected by the present study
383	Rivularine，7-Angelylretronecine	CC=C(C)C(=O)OC1CCN2CC=C(CO)C12	Pos	PMID: 25660478	Pubmed	Collected by the present study
384	Arecoline Hydrobromide	COC(=O)C1=CCCN(C)C1	Pos	PMID: 30217028	Pubmed	Collected by the present study
385	13-Hydroxygermacrone	CC(CO)=C1CC=C(C)CCC=C(C)CC1=O	Pos	PMID: 28905185	Pubmed	Collected by the present study
386	9-Oxo-Agerophorone	[H]C12CC(=O)C(C)=CC1([H])C(C(C)C)C(=O)CC2C	Pos	PMID: 28905185	Pubmed	Collected by the present study
387	9-Oxo-10,11-Dehydroagerophorone	[H]C12CC(=O)C(C)=CC1([H])C(=C(C)C)C(=O)CC2C	Pos	PMID: 28905185	Pubmed	Collected by the present study
388	Dihydrokavain	COC1=CC(=O)OC(CCC2=CC=CC=C2)C1	Pos	PMID: 25660478	Pubmed	Collected by the present study
389	Dehydrocostus Lactone	C=C1CCC2C1C1OC(=O)C(=C)C1CCC2=C	Pos	DOI: 10.19540/j.cnki.cjcmm.20161222.051	CNKI	Collected by the present study
390	Kavain	COC1=CC(=O)OC(C1)C=CC1=CC=CC=C1	Pos	PMID: 25660478	Pubmed	Collected by the present study
391	Myristic Acid	CCCCCCCCCCCCCC(O)=O	Pos	1009-5519(2005)04-0379-02	CNKI	Collected by the present study
392	1-Hydroxyanthraquinone	OC1=CC=CC2=C1C(=O)C1=CC=CC=C1C2=O	Pos	PMID: 29782898	Pubmed	Collected by the present study
393	Elemol	CC(=C)C1CC(CCC1(C)C=C)C(C)(C)O	Pos	DOI: 10.19540/j.cnki.cjcmm.20161222.051	CNKI	Collected by the present study
394	Othonecine	C[N+]12CCC(O)C1(O)C(CO)=CC2	Pos	DOI: 10.7501/j.issn.0253-2670.2018.22.031	CNKI	Collected by the present study
395	α-Costol	CC1=CCCC2(C)CCC(CC12)C(=C)CO	Pos	DOI: 10.19540/j.cnki.cjcmm.20161222.051	CNKI	Collected by the present study
396	Germacrone	CC(C)=C1CC=C(C)CCC=C(C)CC1=O	Pos	PMID: 28905185	Pubmed	Collected by the present study
397	1-Methyl-L-Tryptophan	CN1C=C(CC(N)C(O)=O)C2=CC=CC=C12	Pos	1009-5519(2005)04-0379-02	CNKI	Collected by the present study
398	Securinine	O=C1OC23CC(C=CC2=C1)N1CCCCC31	Pos	1009-5519(2005)04-0379-02	CNKI	Collected by the present study
399	Bergapten	COC1=C2C=CC(=O)OC2=CC2=C1C=CO2	Pos	-	CNKI	Collected by the present study
400	Xanthotoxin	COC1=C2OC(=O)C=CC2=CC2=C1OC=C2	Pos	PMID: 27890005	Pubmed	Collected by the present study
401	Dihydropyrocurzerenone	CC1CCC2=C(C1)C1=C(OC=C1C)C=C2C	Pos	1009-5519(2005)04-0379-02	CNKI	Collected by the present study
402	Pyrocurzerenone	CC1=COC2=C1C1=C(CCC(C)=C1)C(C)=C2	Pos	1009-5519(2005)04-0379-02	CNKI	Collected by the present study
403	Pilocarpine	CCC1C(CC2=CN=CN2C)COC1=O	Pos	1009-5519(2005)04-0379-02	CNKI	Collected by the present study
404	α-Asarone，β-Asarone	COC1=CC(OC)=C(OC)C=C1C=CC	Pos	PMID: 30217028	Pubmed	Collected by the present study
405	Acetyleugenol	COC1=C(OC(C)=O)C=CC(CC=C)=C1	Pos	1009-5519(2005)04-0379-02	CNKI	Collected by the present study
406	Dictamine	COC1=C2C=COC2=NC2=CC=CC=C12	Pos	DOI: 10.13422/j.cnki.syfjx.2017020227	CNKI	Collected by the present study
407	Cantharidin	CC12C3CCC(O3)C1(C)C(=O)OC2=O	Pos	DOI: 10.13194/j.issn.1673-842x.2015.09.075	CNKI	Collected by the present study
408	Myristicin	COC1=CC(CC=C)=CC2=C1OCO2	Pos	PMID: 27890005	Pubmed	Collected by the present study
409	Plumbagin	CC1=CC(=O)C2=C(C=CC=C2O)C1=O	Pos	DOI: 10.3969/j.issn.1008-0805.2013.03.093	CNKI	Collected by the present study
410	Psoralen	O=C1OC2=CC3=C(C=CO3)C=C2C=C1	Pos	PMID: 27890005	Pubmed	Collected by the present study
411	Alpha-Naphthylisothiocyanate	S=C=NC1=CC=CC2=CC=CC=C12	Pos	PMID: 19389047	Pubmed	Collected by the present study
412	Otonecine	CN1CCC(O)C(=O)C(CO)=CC1	Pos	PMID: 27012588	Pubmed	Collected by the present study
413	Muscarine	CC1OC(C[N+](C)(C)C)CC1O	Pos	1672-2523(2013)10-0157-02	CNKI	Collected by the present study
414	Gallic Acid	OC(=O)C1=CC(O)=C(O)C(O)=C1	Pos	DOI: 10.13862/j.cnki.cn43-1446/r.2017.15.027	CNKI	Collected by the present study
415	Isopulegone Epoxide	CC1CCC(C(=O)C1)C1(C)CO1	Pos	PMID: 25512112	Pubmed	Collected by the present study
416	Norcantharidin	O=C1OC(=O)C2C3CCC(O3)C12	Pos	DOI: 10.13194/j.issn.1673-842x.2015.09.075	CNKI	Collected by the present study
417	Ephedrine	CNC(C)C(O)C1=CC=CC=C1	Pos	PMID: 25660478	Pubmed	Collected by the present study
418	Eugenol	COC1=C(O)C=CC(CC=C)=C1	Pos	PMID: 19615308	Pubmed	Collected by the present study
419	Ricinine	COC1=C(C#N)C(=O)N(C)C=C1	Pos	1009-5519(2005)04-0379-02	CNKI	Collected by the present study
420	N-Acetylcysteine	CC(=O)NC(CS)C(O)=O	Neg	PMID: 22318308	Pubmed	Collected by the present study
421	Umbelliferone	OC1=CC2=C(C=C1)C=CC(=O)O2	Pos	PMID: 24278574	Pubmed	Collected by the present study
422	Menthol	CC(C)C1CCC(C)CC1O	Pos	PMID: 29117101	Pubmed	Collected by the present study
423	Retronecine	OCC1=CCN2CCC(O)C12	Pos	PMID: 25660478	Pubmed	Collected by the present study
424	Isopulegol	CC1CCC(C(O)C1)C(C)=C	Pos	PMID: 25512112	Pubmed	Collected by the present study
425	Pulegol	CC1CCC(C(O)C1)=C(C)C	Pos	PMID: 25512112	Pubmed	Collected by the present study
426	Isomenthone，Menthone	CC(C)C1CCC(C)CC1=O	Pos	PMID: 25512112, PMID: 29117101	Pubmed	Collected by the present study
427	Dehydrorectronecine	OCC1=C2C(O)CCN2C=C1	Pos	PMID: 29117101	Pubmed	Collected by the present study
428	(S)-Pulegone，(R)-Pulegone	CC1CCC(=C(C)C)C(=O)C1	Pos	PMID: 25512112, PMID: 28905185	Pubmed	Collected by the present study
429	Piperitone	CC(C)C1CCC(C)=CC1=O	Pos	PMID: 25512112	Pubmed	Collected by the present study
430	Camphor	CC1(C)C2CCC1(C)C(=O)C2	Pos	PMID: 28905185	Pubmed	Collected by the present study
431	Citral	CC(C)=CCCC(C)=CC=O	Pos	PMID: 28905185	Pubmed	Collected by the present study
432	Vanillin	COC1=C(O)C=CC(C=O)=C1	Pos	PMID: 29782898	Pubmed	Collected by the present study
433	Menthofuran	CC1CCC2=C(C1)OC=C2C	Pos	PMID: 27890005	Pubmed	Collected by the present study
434	Piperitenone	CC(C)=C1CCC(C)=CC1=O	Pos	PMID: 25512112	Pubmed	Collected by the present study
435	Coumarin	O=C1OC2=CC=CC=C2C=C1	Pos	PMID: 21459083	Pubmed	Collected by the present study
436	Stachydrine	C[N+]1(C)CCCC1C([O-])=O	Pos	DOI: 10.11842/wst.2015.03.035	CNKI	Collected by the present study
437	Pelletierine	CC(=O)CC1CCCCN1	Pos	DOI: 10.4268/cjcmm20112331	CNKI	Collected by the present study
438	Trachelanthamidine	OCC1CCN2CCCC12	Pos	PMID: 25660478	Pubmed	Collected by the present study
439	2-(Propan-2-Ylidene)Cyclohexanone	CC(C)=C1CCCCC1=O	Pos	PMID: 25512112	Pubmed	Collected by the present study
440	Salicylic Acid	OC(=O)C1=CC=CC=C1O	Pos	PMID: 29782898	Pubmed	Collected by the present study
441	D-Limonene	CC(=C)C1CCC(C)=CC1	Pos	PMID: 28905185	Pubmed	Collected by the present study
442	Naphthalene	C1=CC2=CC=CC=C2C=C1	Pos	PMID: 26561740	Pubmed	Collected by the present study
443	Pyrogallic Acid	OC1=CC=CC(O)=C1O	Pos	DOI: 10.13862/j.cnki.cn43-1446/r.2017.15.027	CNKI	Collected by the present study
444	3-Methylcyclo-Hexanone	CC1CCCC(=O)C1	Pos	PMID: 25512112	Pubmed	Collected by the present study
445	Valeric Acid	CCCCC(O)=O	Pos	1009-5519(2005)04-0379-02	CNKI	Collected by the present study
446	Senecioic Acid	CC(C)=CC(O)=O	Pos	DOI: 10.3969/j.issn.1008-1070.2017.03.005	CNKI	Collected by the present study
447	1,3 Dinitrobenzene	[O-][N+](=O)C1=CC(=CC=C1)[N+]([O-])=O	Pos	PMID: 20553011	Pubmed	Collected from prior studies which focused on developing QSAR models for DILI
448	17-Alpha-Ethynylestradiol	CC12CCC3C(CCC4=CC(OS(O)(=O)=O)=CC=C34)C1CCC2(O)C#C	Pos	PMID: 20553011	Pubmed	Collected from prior studies which focused on developing QSAR models for DILI
449	2,4,6-Trinitrotoluene	CC1=C(C=C(C=C1[N+]([O-])=O)[N+]([O-])=O)[N+]([O-])=O	Pos	PMID: 21898162	Pubmed	Collected from prior studies which focused on developing QSAR models for DILI
450	2,4-Dinitrophenol	OC1=CC=C(C=C1[N+]([O-])=O)[N+]([O-])=O	Pos	PMID: 21898162	Pubmed	Collected from prior studies which focused on developing QSAR models for DILI
451	2-Acetamidofluorene	CC(=O)NC1=CC=C2C(CC3=CC=CC=C23)=C1	Pos	PMID: 21699217	Pubmed	Collected from prior studies which focused on developing QSAR models for DILI
452	2-Chloroprocaine	CCN(CC)CCOC(=O)C1=C(Cl)C=C(N)C=C1	Neg	PMID: 22194678	Pubmed	Collected from prior studies which focused on developing QSAR models for DILI
453	2-Ethoxyethanol	CCOCCO	Pos	PMID: 21898162	Pubmed	Collected from prior studies which focused on developing QSAR models for DILI
454	2-Naphthol	OC1=CC2=CC=CC=C2C=C1	Pos	PMID: 21898162	Pubmed	Collected from prior studies which focused on developing QSAR models for DILI
455	3-Methylcholanthrene	CC1=C2CCC3=C2C(C=C1)=CC1=C3C=CC2=C1C=CC=C2	Pos	PMID: 20553011	Pubmed	Collected from prior studies which focused on developing QSAR models for DILI
456	5-Fluorocytosine	NC1=C(F)C=NC(=O)N1	Pos	PMID: 22194678	Pubmed	Collected from prior studies which focused on developing QSAR models for DILI
457	6-Thioguanine	NC1=NC(=S)C2N=CN=C2N1	Pos	PMID: 22194678	Pubmed	Collected from prior studies which focused on developing QSAR models for DILI
458	Acamprosate	CC(=O)NCCCS(O)(=O)=O	Neg	PMID: 23456678	Pubmed	Collected from prior studies which focused on developing QSAR models for DILI
459	Acemetacin	COC1=CC=C2N(C(=O)C3=CC=C(Cl)C=C3)C(C)=C(CC(=O)OCC(O)=O)C2=C1	Pos	PMID: 21898162	Pubmed	Collected from prior studies which focused on developing QSAR models for DILI
460	Acenocoumarol	CC(=O)CC(C1=CC=C(C=C1)[N+]([O-])=O)C1=C(O)OC2=CC=CC=C2C1=O	Pos	PMID: 20843939	Pubmed	Collected from prior studies which focused on developing QSAR models for DILI
461	Acetohexamide	CC(=O)C1=CC=C(C=C1)S(=O)(=O)NC(=O)NC1CCCCC1	Pos	PMID: 23456678	Pubmed	Collected from prior studies which focused on developing QSAR models for DILI
462	Acetone Cyanohydrin	CC(C)(O)C#N	Pos	PMID: 21898162	Pubmed	Collected from prior studies which focused on developing QSAR models for DILI
463	Acetophenazine	CC(=O)C1=CC=C2SC3=CC=CC=C3N(CCCN3CCN(CCO)CC3)C2=C1	Pos	PMID: 21898162	Pubmed	Collected from prior studies which focused on developing QSAR models for DILI
464	Acetylcholine Chloride	CC(=O)OCC[N+](C)(C)C	Neg	PMID: 26948801	Pubmed	Collected from prior studies which focused on developing QSAR models for DILI
465	Acivicin	NC(C1CC(Cl)=NO1)C(O)=O	Neg	PMID: 18524759	Pubmed	Collected from prior studies which focused on developing QSAR models for DILI
466	Aclidinium	OC(C(=O)OC1C[N+]2(CCCOC3=CC=CC=C3)CCC1CC2)(C1=CC=CS1)C1=CC=CS1	Neg	PMID: 23456678	Pubmed	Collected from prior studies which focused on developing QSAR models for DILI
467	Acrivastine	CC1=CC=C(C=C1)C(=CCN1CCCC1)C1=CC=CC(C=CC(O)=O)=N1	Neg	PMID: 23456678	Pubmed	Collected from prior studies which focused on developing QSAR models for DILI
468	Adefovir Dipivoxil	CC(C)(C)C(=O)OCOP(=O)(COCCN1C=NC2=C(N)N=CN=C12)OCOC(=O)C(C)(C)C	Pos	PMID: 21898162	Pubmed	Collected from prior studies which focused on developing QSAR models for DILI
469	Ads	OC(=O)C1=CC(C=CC1=O)=NNC1=CC(C(O)=O)=C(O)C=C1	Pos	PMID: 22194678	Pubmed	Collected from prior studies which focused on developing QSAR models for DILI
470	Afelimomab	COC1=CC=C(C=C2CCCN=C2C2=CC=CN=C2)C(OC)=C1	Pos	PMID: 21898162	Pubmed	Collected from prior studies which focused on developing QSAR models for DILI
471	Aflatoxin B1	COC1=CC2=C(C3C=COC3O2)C2=C1C1=C(C(=O)CC1)C(=O)O2	Pos	PMID: 20843939	Pubmed	Collected from prior studies which focused on developing QSAR models for DILI
472	Alacepril	CC(CSC(C)=O)C(=O)N1CCCC1C(=O)NC(CC1=CC=CC=C1)C(O)=O	Pos	PMID: 21898162	Pubmed	Collected from prior studies which focused on developing QSAR models for DILI
473	Alba	OC1=CC=C(OCC2=CC=CC=C2)C=C1	Neg	PMID: 22194678	Pubmed	Collected from prior studies which focused on developing QSAR models for DILI
474	Alclometasone	CC1CC2C3C(Cl)CC4=CC(=O)C=CC4(C)C3C(O)CC2(C)C1(O)C(=O)CO	Neg	PMID: 20192250	Pubmed	Collected from prior studies which focused on developing QSAR models for DILI
475	Alclometasone Dipropionate	CCC(=O)OCC(=O)C1(OC(=O)CC)C(C)CC2C3C(Cl)CC4=CC(=O)C=CC4(C)C3C(O)CC12C	Neg	PMID: 20192250	Pubmed	Collected from prior studies which focused on developing QSAR models for DILI
476	Aldrin	ClC1=C(Cl)C2(Cl)C3C4CC(C=C4)C3C1(Cl)C2(Cl)Cl	Pos	PMID: 21898162	Pubmed	Collected from prior studies which focused on developing QSAR models for DILI
477	Alfentanil	CCN1N=NN(CCN2CCC(COC)(CC2)N(C(=O)CC)C2=CC=CC=C2)C1=O	Neg	PMID: 23456678	Pubmed	Collected from prior studies which focused on developing QSAR models for DILI
478	Alfuzosin	COC1=CC2=NC(=NC(N)=C2C=C1OC)N(C)CCCNC(=O)C1CCCO1	Pos	PMID: 21898162	Pubmed	Collected from prior studies which focused on developing QSAR models for DILI
479	Aliskiren	COCCCOC1=C(OC)C=CC(CC(CC(N)C(O)CC(C(C)C)C(=O)NCC(C)(C)C(N)=O)C(C)C)=C1	Neg	PMID: 23997115	Pubmed	Collected from prior studies which focused on developing QSAR models for DILI
480	Almotriptan	CN(C)CCC1=CNC2=C1C=C(CS(=O)(=O)N1CCCC1)C=C2	Neg	PMID: 23456678	Pubmed	Collected from prior studies which focused on developing QSAR models for DILI
481	Alpha-Linolenic Acid	CCC=CCC=CCC=CCCCCCCCC(O)=O	Neg	PMID: 23456678	Pubmed	Collected from prior studies which focused on developing QSAR models for DILI
482	Amantadine	NC12CC3CC(CC(C3)C1)C2	Neg	PMID: 23456678	Pubmed	Collected from prior studies which focused on developing QSAR models for DILI
483	Ambenonium	CC[N+](CC)(CCNC(=O)C(=O)NCC[N+](CC)(CC)CC1=CC=CC=C1Cl)CC1=CC=CC=C1Cl	Neg	PMID: 26948801	Pubmed	Collected from prior studies which focused on developing QSAR models for DILI
484	Amcinonide	CC(=O)OCC(=O)C12OC3(CCCC3)OC1CC1C3CCC4=CC(=O)C=CC4(C)C3(F)C(O)CC21C	Neg	PMID: 20192250	Pubmed	Collected from prior studies which focused on developing QSAR models for DILI
485	Amdinocillin	CC1(C)SC2C(N=CN3CCCCCC3)C(=O)N2C1C(O)=O	Pos	PMID: 21898162	Pubmed	Collected from prior studies which focused on developing QSAR models for DILI
486	Amifostine	NCCCNCCSP(O)(O)=O	Neg	PMID: 26948801	Pubmed	Collected from prior studies which focused on developing QSAR models for DILI
487	Aminocaproic Acid	NCCCCCC(O)=O	Neg	PMID: 26948801	Pubmed	Collected from prior studies which focused on developing QSAR models for DILI
488	Amithiozone	CC(=O)NC1=CC=C(C=NNC(N)=S)C=C1	Pos	PMID: 21898162	Pubmed	Collected from prior studies which focused on developing QSAR models for DILI
489	Amitriptyline	CN(C)CCC=C1C2=CC=CC=C2CCC2=CC=CC=C12	Pos	PMID: 23456678	Pubmed	Collected from prior studies which focused on developing QSAR models for DILI
490	Amlexanox	CC(C)C1=CC=C2OC3=C(C=C(C(O)=O)C(N)=N3)C(=O)C2=C1	Neg	PMID: 20192250	Pubmed	Collected from prior studies which focused on developing QSAR models for DILI
491	Amodiaquine	CCN(CC)CC1=CC(NC2=CC=NC3=CC(Cl)=CC=C23)=CC=C1O	Pos	PMID: 23456678	Pubmed	Collected from prior studies which focused on developing QSAR models for DILI
492	Amonafide	CN(C)CCN1C(=O)C2=CC(N)=CC3=CC=CC(C1=O)=C23	Pos	PMID: 21898162	Pubmed	Collected from prior studies which focused on developing QSAR models for DILI
493	Amoxicillin	CC1(C)SC2C(NC(=O)C(N)C3=CC=C(O)C=C3)C(=O)N2C1C(O)=O	Pos	PMID: 23456678	Pubmed	Collected from prior studies which focused on developing QSAR models for DILI
494	Amsacrine Hcl	COC1=C(NC2=C3C=CC=CC3=NC3=CC=CC=C23)C=CC(NS(C)(=O)=O)=C1	Pos	PMID: 18524759	Pubmed	Collected from prior studies which focused on developing QSAR models for DILI
495	Anastrozole	CC(C)(C#N)C1=CC(=CC(CN2C=NC=N2)=C1)C(C)(C)C#N	Pos	PMID: 20192250	Pubmed	Collected from prior studies which focused on developing QSAR models for DILI
496	Anileridine Hcl	CCOC(=O)C1(CCN(CCC2=CC=C(N)C=C2)CC1)C1=CC=CC=C1	Neg	PMID: 20843939	Pubmed	Collected from prior studies which focused on developing QSAR models for DILI
497	Aniracetam	COC1=CC=C(C=C1)C(=O)N1CCCC1=O	Neg	PMID: 21898162	Pubmed	Collected from prior studies which focused on developing QSAR models for DILI
498	Anisindione	COC1=CC=C(C=C1)C1C(=O)C2=CC=CC=C2C1=O	Neg	PMID: 21898162	Pubmed	Collected from prior studies which focused on developing QSAR models for DILI
499	Anisotropine	CCCC(CCC)C(=O)OC1CC2CCC(C1)[N+]2(C)C	Neg	PMID: 21898162	Pubmed	Collected from prior studies which focused on developing QSAR models for DILI
500	Apolar	CC1(C)OC2CC3C4CCC5=CC(=O)C=CC5(C)C4C(O)CC3(C)C2(O1)C(=O)CO	Neg	PMID: 22194678	Pubmed	Collected from prior studies which focused on developing QSAR models for DILI
501	Apomorphine	CN1CCC2=CC=CC3=C2C1CC1=C3C(O)=C(O)C=C1	Neg	PMID: 23456678	Pubmed	Collected from prior studies which focused on developing QSAR models for DILI
502	Apraclonidine	NC1=CC(Cl)=C(N=C2NCCN2)C(Cl)=C1	Neg	PMID: 20192250	Pubmed	Collected from prior studies which focused on developing QSAR models for DILI
503	Apremilast	CCOC1=C(OC)C=CC(=C1)C(CS(C)(=O)=O)N1C(=O)C2=CC=CC(NC(C)=O)=C2C1=O	Neg	PMID: 23456678	Pubmed	Collected from prior studies which focused on developing QSAR models for DILI
504	Aprepitant	CC(OC1OCCN(CC2=NC(=O)NN2)C1C1=CC=C(F)C=C1)C1=CC(=CC(=C1)C(F)(F)F)C(F)(F)F	Neg	PMID: 23456678	Pubmed	Collected from prior studies which focused on developing QSAR models for DILI
505	Aprindine	CCN(CC)CCCN(C1CC2=CC=CC=C2C1)C1=CC=CC=C1	Pos	PMID: 21898162	Pubmed	Collected from prior studies which focused on developing QSAR models for DILI
506	Arbutamine	OC(CNCCCCC1=CC=C(O)C=C1)C1=CC=C(O)C(O)=C1	Neg	PMID: 21898162	Pubmed	Collected from prior studies which focused on developing QSAR models for DILI
507	Aripiprazole	ClC1=CC=CC(N2CCN(CCCCOC3=CC=C4CCC(=O)NC4=C3)CC2)=C1Cl	Neg	PMID: 23456678	Pubmed	Collected from prior studies which focused on developing QSAR models for DILI
508	Armodafinil	NC(=O)CS(=O)C(C1=CC=CC=C1)C1=CC=CC=C1	Neg	PMID: 23456678	Pubmed	Collected from prior studies which focused on developing QSAR models for DILI
509	Articaine	CCCNC(C)C(=O)NC1=C(SC=C1C)C(=O)OC	Neg	PMID: 23456678	Pubmed	Collected from prior studies which focused on developing QSAR models for DILI
510	Ascorbic Acid	OCC(O)C1OC(O)=C(O)C1=O	Neg	PMID: 23456678	Pubmed	Collected from prior studies which focused on developing QSAR models for DILI
511	Aspirin	CC(=O)OC1=CC=CC=C1C(O)=O	Pos	PMID: 23456678	Pubmed	Collected from prior studies which focused on developing QSAR models for DILI
512	Astemizole	COC1=CC=C(CCN2CCC(CC2)NC2=NC3=CC=CC=C3N2CC2=CC=C(F)C=C2)C=C1	Neg	PMID: 20192250	Pubmed	Collected from prior studies which focused on developing QSAR models for DILI
513	Asunaprevir	COC1=CN=C(OC2CC(N(C2)C(=O)C(NC(=O)OC(C)(C)C)C(C)(C)C)C(=O)NC2(CC2C=C)C(=O)NS(=O)(=O)C2CC2)C2=C1C=CC(Cl)=C2	Pos	PMID: 23456678	Pubmed	Collected from prior studies which focused on developing QSAR models for DILI
514	Atrazine	CCNC1=NC(Cl)=NC(NC(C)C)=N1	Pos	PMID: 21898162	Pubmed	Collected from prior studies which focused on developing QSAR models for DILI
515	Ay-25329	ClC1=CC=C2SC3=CC=CC=C3N(C(=O)CCN3CCN4CCCC4C3)C2=C1	Pos	PMID: 20553011	Pubmed	Collected from prior studies which focused on developing QSAR models for DILI
516	Azacytidine	NC1=NC(=O)N(C=N1)C1OC(CO)C(O)C1O	Pos	PMID: 20843939	Pubmed	Collected from prior studies which focused on developing QSAR models for DILI
517	Azelaic Acid	OC(=O)CCCCCCCC(O)=O	Neg	PMID: 21898162	Pubmed	Collected from prior studies which focused on developing QSAR models for DILI
518	Azelastine	CN1CCCC(CC1)N1N=C(CC2=CC=C(Cl)C=C2)C2=CC=CC=C2C1=O	Neg	PMID: 20192250	Pubmed	Collected from prior studies which focused on developing QSAR models for DILI
519	Azithromycin	CCC1OC(=O)C(C)C(OC2CC(C)(OC)C(O)C(C)O2)C(C)C(OC2OC(C)CC(C2O)N(C)C)C(C)(O)CC(C)CN(C)C(C)C(O)C1(C)O	Pos	PMID: 23456678	Pubmed	Collected from prior studies which focused on developing QSAR models for DILI
520	Bcnu	ClCCNC(=O)N(CCCl)N=O	Pos	PMID: 22194678	Pubmed	Collected from prior studies which focused on developing QSAR models for DILI
521	Beclomethasone	CC1CC2C3CCC4=CC(=O)C=CC4(C)C3(Cl)C(O)CC2(C)C1(O)C(=O)CO	Neg	PMID: 20192250	Pubmed	Collected from prior studies which focused on developing QSAR models for DILI
522	Bendazac	OC(=O)COC1=NN(CC2=CC=CC=C2)C2=CC=CC=C12	Pos	PMID: 26948801	Pubmed	Collected from prior studies which focused on developing QSAR models for DILI
523	Bendroflumethiazide	NS(=O)(=O)C1=CC2=C(NC(CC3=CC=CC=C3)NS2(=O)=O)C=C1C(F)(F)F	Neg	PMID: 23456678	Pubmed	Collected from prior studies which focused on developing QSAR models for DILI
524	Benoxinate	CCCCOC1=CC(=CC=C1N)C(=O)OCCN(CC)CC	Neg	PMID: 21898162	Pubmed	Collected from prior studies which focused on developing QSAR models for DILI
525	Bentazepam	O=C1CNC(=C2C3=C(CCCC3)SC2=N1)C1=CC=CC=C1	Pos	PMID: 21898162	Pubmed	Collected from prior studies which focused on developing QSAR models for DILI
526	Bentiromide	OC(=O)C1=CC=C(NC(=O)C(CC2=CC=C(O)C=C2)NC(=O)C2=CC=CC=C2)C=C1	Neg	PMID: 21898162	Pubmed	Collected from prior studies which focused on developing QSAR models for DILI
527	Benzarone	CCC1=C(C(=O)C2=CC=C(O)C=C2)C2=CC=CC=C2O1	Pos	PMID: 23456678	Pubmed	Collected from prior studies which focused on developing QSAR models for DILI
528	Benzidine	CC(=O)C(N=NC1=CC=C(C=C1Cl)C1=CC=C(N=NC(C(C)=O)C(=O)NC2=CC=CC=C2)C(Cl)=C1)C(=O)NC1=CC=CC=C1	Pos	PMID: 21898162	Pubmed	Collected from prior studies which focused on developing QSAR models for DILI
529	Benzoyl Peroxide	O=C(OOC(=O)C1=CC=CC=C1)C1=CC=CC=C1	Neg	PMID: 22194678	Pubmed	Collected from prior studies which focused on developing QSAR models for DILI
530	Benzthiazide	NS(=O)(=O)C1=CC2=C(NC(CSCC3=CC=CC=C3)=NS2(=O)=O)C=C1Cl	Neg	PMID: 21898162	Pubmed	Collected from prior studies which focused on developing QSAR models for DILI
531	Benzydamine	CN(C)CCCOC1=NN(CC2=CC=CC=C2)C2=CC=CC=C12	Neg	PMID: 22194678	Pubmed	Collected from prior studies which focused on developing QSAR models for DILI
532	Benzylpenicilloyl Polylysine	CC1(C)SC(NC1C(O)=O)C(NC(=O)CC1=CC=CC=C1)C(=O)NCCCCCC(O)=O	Neg	PMID: 26948801	Pubmed	Collected from prior studies which focused on developing QSAR models for DILI
533	Bethanidine	CNC(NCC1=CC=CC=C1)=NC	Neg	PMID: 21898162	Pubmed	Collected from prior studies which focused on developing QSAR models for DILI
534	Bimatoprost	CCNC(=O)CCCC=CCC1C(O)CC(O)C1C=CC(O)CCC1=CC=CC=C1	Pos	PMID: 21898162	Pubmed	Collected from prior studies which focused on developing QSAR models for DILI
535	Bisoprolol	CC(C)NCC(O)COC1=CC=C(COCCOC(C)C)C=C1	Neg	PMID: 23456678	Pubmed	Collected from prior studies which focused on developing QSAR models for DILI
536	Bithionol	OC1=C(Cl)C=C(Cl)C=C1SC1=CC(Cl)=CC(Cl)=C1O	Pos	PMID: 20843939	Pubmed	Collected from prior studies which focused on developing QSAR models for DILI
537	Bitolterol	CC1=CC=C(C=C1)C(=O)OC1=C(OC(=O)C2=CC=C(C)C=C2)C=C(C=C1)C(O)CNC(C)(C)C	Neg	PMID: 20192250	Pubmed	Collected from prior studies which focused on developing QSAR models for DILI
538	Bosentan	COC1=CC=CC=C1OC1=C(NS(=O)(=O)C2=CC=C(C=C2)C(C)(C)C)N=C(N=C1OCCO)C1=NC=CC=N1	Pos	PMID: 26948801	Pubmed	Collected from prior studies which focused on developing QSAR models for DILI
539	Bretylium	CC[N+](C)(C)CC1=CC=CC=C1Br	Neg	PMID: 21898162	Pubmed	Collected from prior studies which focused on developing QSAR models for DILI
540	Brexpiprazole	O=C1NC2=C(C=C1)C=CC(OCCCCN1CCN(CC1)C1=CC=CC3=C1C=CS3)=C2	Neg	PMID: 23456678	Pubmed	Collected from prior studies which focused on developing QSAR models for DILI
541	Brivaracetam	CCCC1CN(C(CC)C(N)=O)C(=O)C1	Neg	PMID: 23456678	Pubmed	Collected from prior studies which focused on developing QSAR models for DILI
542	Bropirimine	NC1=NC(=O)C(Br)=C(N1)C1=CC=CC=C1	Pos	PMID: 21898162	Pubmed	Collected from prior studies which focused on developing QSAR models for DILI
543	Broxuridine	OCC1OC(CC1O)N1C=C(Br)C(=O)NC1=O	Pos	PMID: 21898162	Pubmed	Collected from prior studies which focused on developing QSAR models for DILI
544	Bucetin	CCOC1=CC=C(NC(=O)CC(C)O)C=C1	Pos	PMID: 21699217	Pubmed	Collected from prior studies which focused on developing QSAR models for DILI
545	Buclizine	CC(C)(C)C1=CC=C(CN2CCN(CC2)C(C2=CC=CC=C2)C2=CC=C(Cl)C=C2)C=C1	Neg	PMID: 21898162	Pubmed	Collected from prior studies which focused on developing QSAR models for DILI
546	Budesonide	CCCC1OC2CC3C4CCC5=CC(=O)C=CC5(C)C4C(O)CC3(C)C2(O1)C(=O)CO	Neg	PMID: 23456678	Pubmed	Collected from prior studies which focused on developing QSAR models for DILI
547	Bumetanide	CCCCNC1=CC(=CC(=C1OC1=CC=CC=C1)S(N)(=O)=O)C(O)=O	Neg	PMID: 23456678	Pubmed	Collected from prior studies which focused on developing QSAR models for DILI
548	Buprenorphine	COC12CCC3(CC1C(C)(O)C(C)(C)C)C1CC4=CC=C(O)C5=C4C3(CCN1CC1CC1)C2O5	Neg	PMID: 21898162	Pubmed	Collected from prior studies which focused on developing QSAR models for DILI
549	Buscopan	CCCC[N+]1(C)C2CC(CC1C1OC21)OC(=O)C(CO)C1=CC=CC=C1	Neg	PMID: 22194678	Pubmed	Collected from prior studies which focused on developing QSAR models for DILI
550	Buspirone	O=C1CC2(CCCC2)CC(=O)N1CCCCN1CCN(CC1)C1=NC=CC=N1	Neg	PMID: 23456678	Pubmed	Collected from prior studies which focused on developing QSAR models for DILI
551	Butenafine	CN(CC1=CC=C(C=C1)C(C)(C)C)CC1=CC=CC2=C1C=CC=C2	Neg	PMID: 20192250	Pubmed	Collected from prior studies which focused on developing QSAR models for DILI
552	Butorphanol	OC1=CC2=C(CC3N(CC4CCC4)CCC22CCCCC32O)C=C1	Neg	PMID: 26948801	Pubmed	Collected from prior studies which focused on developing QSAR models for DILI
553	Butylated Hydroxytoluene	CC1=CC(=C(O)C(=C1)C(C)(C)C)C(C)(C)C	Pos	PMID: 20843939	Pubmed	Collected from prior studies which focused on developing QSAR models for DILI
554	Cabazitaxel	[H]C12C(OC(=O)C3=CC=CC=C3)C3(O)CC(OC(=O)C(O)C(NC(=O)OC(C)(C)C)C4=CC=CC=C4)C(C)=C(C(OC)C(=O)C1(C)C(CC1OCC21OC(C)=O)OC)C3(C)C	Neg	PMID: 23456678	Pubmed	Collected from prior studies which focused on developing QSAR models for DILI
555	Cabergoline	CCNC(=O)N(CCCN(C)C)C(=O)C1CC2C(CC3=CNC4=CC=CC2=C34)N(CC=C)C1	Neg	PMID: 26948801	Pubmed	Collected from prior studies which focused on developing QSAR models for DILI
556	Calcipotriene	CC(C=CC(O)C1CC1)C1CCC2C(CCCC12C)=CC=C1CC(O)CC(O)C1=C	Neg	PMID: 20192250	Pubmed	Collected from prior studies which focused on developing QSAR models for DILI
557	Candesartan Cilexetil	CCOC1=NC2=CC=CC(C(=O)OC(C)OC(=O)OC3CCCCC3)=C2N1CC1=CC=C(C=C1)C1=CC=CC=C1C1=NNN=N1	Pos	PMID: 21898162	Pubmed	Collected from prior studies which focused on developing QSAR models for DILI
558	Cangrelor	CSCCNC1=C2N=CN(C3OC(COP(O)(=O)OP(O)(=O)C(Cl)(Cl)P(O)(O)=O)C(O)C3O)C2=NC(SCCC(F)(F)F)=N1	Neg	PMID: 23456678	Pubmed	Collected from prior studies which focused on developing QSAR models for DILI
559	Capecitabine	CCCCCOC(=O)NC1=NC(=O)N(C=C1F)C1OC(C)C(O)C1O	Pos	PMID: 21898162	Pubmed	Collected from prior studies which focused on developing QSAR models for DILI
560	Capreomycin	CC1NC(=O)C(N)CNC(=O)C(NC(=O)C(NC(=O)C(CNC(=O)CC(N)CCCN)NC1=O)=CNC(N)=O)C1CCN=C(N)N1	Neg	PMID: 23456678	Pubmed	Collected from prior studies which focused on developing QSAR models for DILI
561	Caprolactam	O=C1CCCCCN1	Pos	PMID: 21898162	Pubmed	Collected from prior studies which focused on developing QSAR models for DILI
562	Captafol	ClC(Cl)C(Cl)(Cl)SN1C(=O)C2CC=CCC2C1=O	Pos	PMID: 21898162	Pubmed	Collected from prior studies which focused on developing QSAR models for DILI
563	Carbachol	C[N+](C)(C)CCOC(N)=O	Neg	PMID: 21898162	Pubmed	Collected from prior studies which focused on developing QSAR models for DILI
564	Carbendazim	COC(=O)NC1=NC2=CC=CC=C2N1	Pos	PMID: 18524759	Pubmed	Collected from prior studies which focused on developing QSAR models for DILI
565	Carbenicillin Indanyl Sodium	CC1(C)SC2C(NC(=O)C(C(=O)OC3=CC4=C(CCC4)C=C3)C3=CC=CC=C3)C(=O)N2C1C(O)=O	Neg	PMID: 22194678	Pubmed	Collected from prior studies which focused on developing QSAR models for DILI
566	Carbenoxolone Disodium	CC1(C)C(CCC2(C)C1CCC1(C)C2C(=O)C=C2C3CC(C)(CCC3(C)CCC12C)C(O)=O)OC(=O)CCC(O)=O	Neg	PMID: 18524759	Pubmed	Collected from prior studies which focused on developing QSAR models for DILI
567	Carbetapentane	CCN(CC)CCOCCOC(=O)C1(CCCC1)C1=CC=CC=C1	Neg	PMID: 23997115	Pubmed	Collected from prior studies which focused on developing QSAR models for DILI
568	Carbimazole	CCOC(=O)N1C=CN(C)C1=S	Pos	PMID: 21898162	Pubmed	Collected from prior studies which focused on developing QSAR models for DILI
569	Carbutamide	CCCCNC(=O)NS(=O)(=O)C1=CC=C(N)C=C1	Pos	PMID: 21898162	Pubmed	Collected from prior studies which focused on developing QSAR models for DILI
570	Carglumic Acid	NC(=O)NC(CCC(O)=O)C(O)=O	Neg	PMID: 23456678	Pubmed	Collected from prior studies which focused on developing QSAR models for DILI
571	Carisoprodol	CCCC(C)(COC(N)=O)COC(=O)NC(C)C	Neg	PMID: 23456678	Pubmed	Collected from prior studies which focused on developing QSAR models for DILI
572	Carprofen	CC(C(O)=O)C1=CC2=C(C=C1)C1=C(N2)C=CC(Cl)=C1	Pos	PMID: 21898162	Pubmed	Collected from prior studies which focused on developing QSAR models for DILI
573	Carteolol	CC(C)(C)NCC(O)COC1=C2CCC(=O)NC2=CC=C1	Neg	PMID: 20192250	Pubmed	Collected from prior studies which focused on developing QSAR models for DILI
574	Cefdinir	NC1=NC(=CS1)C(=NO)C(=O)NC1C2SCC(C=C)=C(N2C1=O)C(O)=O	Pos	PMID: 21898162	Pubmed	Collected from prior studies which focused on developing QSAR models for DILI
575	Cefditoren	CON=C(C(=O)NC1C2SCC(C=CC3=C(C)N=CS3)=C(N2C1=O)C(O)=O)C1=CSC(N)=N1	Pos	PMID: 22194678	Pubmed	Collected from prior studies which focused on developing QSAR models for DILI
576	Cefditoren Pivoxil	CON=C(C(=O)NC1C2SCC(C=CC3=C(C)N=CS3)=C(N2C1=O)C(=O)OCOC(=O)C(C)(C)C)C1=CSC(N)=N1	Pos	PMID: 21898162	Pubmed	Collected from prior studies which focused on developing QSAR models for DILI
577	Cefmenoxime	CON=C(C(=O)NC1C2SCC(CSC3=NN=NN3C)=C(N2C1=O)C(O)=O)C1=CSC(N)=N1	Pos	PMID: 21898162	Pubmed	Collected from prior studies which focused on developing QSAR models for DILI
578	Cefodizime	CON=C(C(=O)NC1C2SCC(CSC3=NC(C)=C(CC(O)=O)S3)=C(N2C1=O)C(O)=O)C1=CSC(N)=N1	Pos	PMID: 21898162	Pubmed	Collected from prior studies which focused on developing QSAR models for DILI
579	Ceforanide	NCC1=CC=CC=C1CC(=O)NC1C2SCC(CSC3=NN=NN3CC(O)=O)=C(N2C1=O)C(O)=O	Pos	PMID: 21898162	Pubmed	Collected from prior studies which focused on developing QSAR models for DILI
580	Cefotiam Hcl	CN(C)CCN1N=NN=C1SCC1=C(N2C(SC1)C(NC(=O)CC1=CSC(N)=N1)C2=O)C(O)=O	Pos	PMID: 20843939	Pubmed	Collected from prior studies which focused on developing QSAR models for DILI
581	Cefpirome	CON=C(C(=O)NC1C2SCC(C[N+]3=CC=CC4=C3CCC4)=C(N2C1=O)C(O)=O)C1=CSC(N)=N1	Pos	PMID: 21898162	Pubmed	Collected from prior studies which focused on developing QSAR models for DILI
582	Cefpodoxime Proxetil	COCC1=C(N2C(SC1)C(NC(=O)C(=NOC)C1=CSC(N)=N1)C2=O)C(=O)OC(C)OC(=O)OC(C)C	Neg	PMID: 20192250	Pubmed	Collected from prior studies which focused on developing QSAR models for DILI
583	Cefsulodin	NC(=O)C1=CC=[N+](CC2=C(N3C(SC2)C(NC(=O)C(C2=CC=CC=C2)S(O)(=O)=O)C3=O)C(O)=O)C=C1	Pos	PMID: 21898162	Pubmed	Collected from prior studies which focused on developing QSAR models for DILI
584	Ceftazidime	CC(C)(CN=C(C(=O)NC1C2SCC(C[N+]3=CC=CC=C3)=C(N2C1=O)C(O)=O)C1=CSC(N)=N1)C(O)=O	Neg	PMID: 20192250	Pubmed	Collected from prior studies which focused on developing QSAR models for DILI
585	Ceftizoxime	CON=C(C(=O)NC1C2SCC=C(N2C1=O)C(O)=O)C1=CSC(=N)N1	Pos	PMID: 20192250	Pubmed	Collected from prior studies which focused on developing QSAR models for DILI
586	Cefuroxime Axetil	CON=C(C(=O)NC1C2SCC(COC(N)=O)=C(N2C1=O)C(=O)OC(C)OC(C)=O)C1=CC=CO1	Neg	PMID: 20192250	Pubmed	Collected from prior studies which focused on developing QSAR models for DILI
587	Cefuroxime Pivoxetil	CON=C(C(=O)NC1C2SCC(COC(N)=O)=C(N2C1=O)C(=O)OC(C)OC(=O)C(C)(C)OC)C1=CC=CO1	Neg	PMID: 20192250	Pubmed	Collected from prior studies which focused on developing QSAR models for DILI
588	Celecoxib	CC1=CC=C(C=C1)C1=CC(=NN1C1=CC=C(C=C1)S(N)(=O)=O)C(F)(F)F	Pos	PMID: 23456678	Pubmed	Collected from prior studies which focused on developing QSAR models for DILI
589	Cephaloridine	[O-]C(=O)C1=C(C[N+]2=CC=CC=C2)CSC2C(NC(=O)CC3=CC=CS3)C(=O)N12	Pos	PMID: 20843939	Pubmed	Collected from prior studies which focused on developing QSAR models for DILI
590	Cevimeline	CC1OC2(CS1)CN1CCC2CC1	Neg	PMID: 23456678	Pubmed	Collected from prior studies which focused on developing QSAR models for DILI
591	Cfb	NC1=NC(Cl)=NC2=C1N=CN2C1OC(CO)C(O)C1F	Pos	PMID: 22194678	Pubmed	Collected from prior studies which focused on developing QSAR models for DILI
592	Chlorambucil	OC(=O)CCCC1=CC=C(C=C1)N(CCCl)CCCl	Pos	PMID: 21898162	Pubmed	Collected from prior studies which focused on developing QSAR models for DILI
593	Chloramphenicol	OCC(NC(=O)C(Cl)Cl)C(O)C1=CC=C(C=C1)[N+]([O-])=O	Pos	PMID: 23456678	Pubmed	Collected from prior studies which focused on developing QSAR models for DILI
594	Chlorbenside	ClC1=CC=C(CSC2=CC=C(Cl)C=C2)C=C1	Pos	PMID: 21898162	Pubmed	Collected from prior studies which focused on developing QSAR models for DILI
595	Chlordecone	ClC12C(=O)C3(Cl)C4(Cl)C1(Cl)C1(Cl)C2(Cl)C3(Cl)C4(Cl)C1(Cl)Cl	Pos	PMID: 21898162	Pubmed	Collected from prior studies which focused on developing QSAR models for DILI
596	Chlormadinone Acetate	CC(=O)OC1(CCC2C3C=C(Cl)C4=CC(=O)CCC4(C)C3CCC12C)C(C)=O	Neg	PMID: 21699217	Pubmed	Collected from prior studies which focused on developing QSAR models for DILI
597	Chlormethiazole	CC1=C(CCCl)SC=N1	Pos	PMID: 21898162	Pubmed	Collected from prior studies which focused on developing QSAR models for DILI
598	Chlormezanone	CN1C(C2=CC=C(Cl)C=C2)S(=O)(=O)CCC1=O	Pos	PMID: 26948801	Pubmed	Collected from prior studies which focused on developing QSAR models for DILI
599	Chloroquine Phosphate	CCN(CC)CCCC(C)NC1=C2C=CC(Cl)=CC2=NC=C1	Neg	PMID: 20843939	Pubmed	Collected from prior studies which focused on developing QSAR models for DILI
600	Chlorotoluene	ClCC1=CC=CC=C1	Pos	PMID: 21898162	Pubmed	Collected from prior studies which focused on developing QSAR models for DILI
601	Chlorotrianisene	COC1=CC=C(C=C1)C(Cl)=C(C1=CC=C(OC)C=C1)C1=CC=C(OC)C=C1	Neg	PMID: 21898162	Pubmed	Collected from prior studies which focused on developing QSAR models for DILI
602	Chloroxine	OC1=C(Cl)C=C(Cl)C2=CC=CN=C12	Neg	PMID: 21898162	Pubmed	Collected from prior studies which focused on developing QSAR models for DILI
603	Chlorphenesin	OCC(O)COC1=CC=C(Cl)C=C1	Neg	PMID: 21898162	Pubmed	Collected from prior studies which focused on developing QSAR models for DILI
604	Chlorpropamide	CCCNC(=O)NS(=O)(=O)C1=CC=C(Cl)C=C1	Pos	PMID: 23456678	Pubmed	Collected from prior studies which focused on developing QSAR models for DILI
605	Chlorprothixene	CN(C)CCC=C1C2=CC=CC=C2SC2=CC=C(Cl)C=C12	Pos	PMID: 21898162	Pubmed	Collected from prior studies which focused on developing QSAR models for DILI
606	Chlortetracycline	CN(C)C1C2CC3C(=C(O)C4=C(O)C=CC(Cl)=C4C3(C)O)C(=O)C2(O)C(=O)C(=C(N)O)C1=O	Pos	PMID: 21898162	Pubmed	Collected from prior studies which focused on developing QSAR models for DILI
607	Chlorthalidone	NS(=O)(=O)C1=CC(=CC=C1Cl)C1(O)NC(=O)C2=CC=CC=C12	Neg	PMID: 23456678	Pubmed	Collected from prior studies which focused on developing QSAR models for DILI
608	Cholestyramine	CC(C)(OC1=CC=C(C=C1)C(=O)C1=CC=C(Cl)C=C1)C(=O)NCCS(O)(=O)=O	Neg	PMID: 21898162	Pubmed	Collected from prior studies which focused on developing QSAR models for DILI
609	Choline	C[N+](C)(C)CCO	Neg	PMID: 23456678	Pubmed	Collected from prior studies which focused on developing QSAR models for DILI
610	Ciclesonide	CC(C)C(=O)OCC(=O)C12OC(OC1CC1C3CCC4=CC(=O)C=CC4(C)C3C(O)CC21C)C1CCCCC1	Neg	PMID: 21898162	Pubmed	Collected from prior studies which focused on developing QSAR models for DILI
611	Ciclopirox	CC1=CC(=O)N(O)C(=C1)C1CCCCC1	Neg	PMID: 20192250	Pubmed	Collected from prior studies which focused on developing QSAR models for DILI
612	Cidofovir	NC1=NC(=O)N(CC(CO)OCP(O)(O)=O)C=C1	Neg	PMID: 23456678	Pubmed	Collected from prior studies which focused on developing QSAR models for DILI
613	Cilazapril	CCOC(=O)C(CCC1=CC=CC=C1)NC1CCCN2CCCC(N2C1=O)C(O)=O	Pos	PMID: 22194678	Pubmed	Collected from prior studies which focused on developing QSAR models for DILI
614	Cinacalcet	CC(NCCCC1=CC(=CC=C1)C(F)(F)F)C1=CC=CC2=CC=CC=C12	Neg	PMID: 26948801	Pubmed	Collected from prior studies which focused on developing QSAR models for DILI
615	Cinchophen	OC(=O)C1=CC(=NC2=CC=CC=C12)C1=CC=CC=C1	Pos	PMID: 26948801	Pubmed	Collected from prior studies which focused on developing QSAR models for DILI
616	Citicoline	C[N+](C)(C)CCOP([O-])(=O)OP(O)(=O)OCC1OC(C(O)C1O)N1C=CC(N)=NC1=O	Neg	PMID: 16598496	Pubmed	Collected from prior studies which focused on developing QSAR models for DILI
617	Clemastine	CN1CCCC1CCOC(C)(C1=CC=CC=C1)C1=CC=C(Cl)C=C1	Neg	PMID: 23456678	Pubmed	Collected from prior studies which focused on developing QSAR models for DILI
618	Clidinium	C[N+]12CCC(CC1)C(C2)OC(=O)C(O)(C1=CC=CC=C1)C1=CC=CC=C1	Neg	PMID: 21898162	Pubmed	Collected from prior studies which focused on developing QSAR models for DILI
619	Clobazam	CN1C2=CC=C(Cl)C=C2N(C2=CC=CC=C2)C(=O)CC1=O	Neg	PMID: 23456678	Pubmed	Collected from prior studies which focused on developing QSAR models for DILI
620	Clobetasol	CCC(=O)OC1(C(C)CC2C3CCC4=CC(=O)C=CC4(C)C3(F)C(O)CC12C)C(=O)CCl	Neg	PMID: 20192250	Pubmed	Collected from prior studies which focused on developing QSAR models for DILI
621	Clocortolone	CC1CC2C3CC(F)C4=CC(=O)C=CC4(C)C3(Cl)C(O)CC2(C)C1C(=O)CO	Neg	PMID: 21898162	Pubmed	Collected from prior studies which focused on developing QSAR models for DILI
622	Clofazimine	CC(C)N=C1C=C2N(C3=CC=C(Cl)C=C3)C3=CC=CC=C3N=C2C=C1NC1=CC=C(Cl)C=C1	Neg	PMID: 23456678	Pubmed	Collected from prior studies which focused on developing QSAR models for DILI
623	Clofedanol	CN(C)CCC(O)(C1=CC=CC=C1)C1=CC=CC=C1Cl	Neg	PMID: 24721472	Pubmed	Collected from prior studies which focused on developing QSAR models for DILI
624	Clonidine	ClC1=CC=CC(Cl)=C1NC1=NCCN1	Neg	PMID: 23456678	Pubmed	Collected from prior studies which focused on developing QSAR models for DILI
625	Clopidogrel	COC(=O)C(N1CCC2=C(C1)C=CS2)C1=CC=CC=C1Cl	Pos	PMID: 23456678	Pubmed	Collected from prior studies which focused on developing QSAR models for DILI
626	Clotiazepam	CCC1=CC2=C(S1)N(C)C(=O)CN=C2C1=CC=CC=C1Cl	Pos	PMID: 21898162	Pubmed	Collected from prior studies which focused on developing QSAR models for DILI
627	Cloxacillin	CC1=C(C(=O)NC2C3SC(C)(C)C(N3C2=O)C(O)=O)C(=NO1)C1=CC=CC=C1Cl	Pos	PMID: 21898162	Pubmed	Collected from prior studies which focused on developing QSAR models for DILI
628	Cocaine	COC(=O)C1C2CCC(CC1OC(=O)C1=CC=CC=C1)N2C	Pos	PMID: 23456678	Pubmed	Collected from prior studies which focused on developing QSAR models for DILI
629	Compendium	BrC1=CC2=C(NC(=O)CN=C2C2=CC=CC=N2)C=C1	Neg	PMID: 22194678	Pubmed	Collected from prior studies which focused on developing QSAR models for DILI
630	Cortisone	CC12CC(=O)C3C(CCC4=CC(=O)CCC34C)C1CCC2(O)C(=O)CO	Neg	PMID: 22194678	Pubmed	Collected from prior studies which focused on developing QSAR models for DILI
631	Cresol	CC1=CC=C(O)C=C1	Pos	PMID: 21898162	Pubmed	Collected from prior studies which focused on developing QSAR models for DILI
632	Crotamiton	CCN(C(=O)C=CC)C1=CC=CC=C1C	Neg	PMID: 21898162	Pubmed	Collected from prior studies which focused on developing QSAR models for DILI
633	Cyclobenzaprine	CN(C)CCC=C1C2=CC=CC=C2C=CC2=CC=CC=C12	Pos	PMID: 21898162	Pubmed	Collected from prior studies which focused on developing QSAR models for DILI
634	Cyclopentolate	CN(C)CCOC(=O)C(C1=CC=CC=C1)C1(O)CCCC1	Neg	PMID: 21898162	Pubmed	Collected from prior studies which focused on developing QSAR models for DILI
635	Cyclothiazide	NS(=O)(=O)C1=CC2=C(NC(NS2(=O)=O)C2CC3CC2C=C3)C=C1Cl	Neg	PMID: 21898162	Pubmed	Collected from prior studies which focused on developing QSAR models for DILI
636	Cyproheptadine Hcl	CN1CCC(CC1)=C1C2=CC=CC=C2C=CC2=CC=CC=C12	Pos	PMID: 18524759	Pubmed	Collected from prior studies which focused on developing QSAR models for DILI
637	Dactinomycin	CC(C)C1N(C)C(=O)CN(C)C(=O)C2CCCN2C(=O)C(C)NC(=O)C(NC(=O)C2=C(N)C(=O)C(C)=C3OC4=C(C)C=CC=C4N=C23)C(C)OC1=O	Pos	PMID: 20192250	Pubmed	Collected from prior studies which focused on developing QSAR models for DILI
638	Dapiprazole	CC1=CC=CC=C1N1CCN(CCC2=NN=C3CCCCN23)CC1	Neg	PMID: 21898162	Pubmed	Collected from prior studies which focused on developing QSAR models for DILI
639	Dapsone	NC1=CC=C(C=C1)S(=O)(=O)C1=CC=C(N)C=C1	Pos	PMID: 23456678	Pubmed	Collected from prior studies which focused on developing QSAR models for DILI
640	Darifenacin	NC(=O)C(C1CCN(CCC2=CC3=C(OCC3)C=C2)C1)(C1=CC=CC=C1)C1=CC=CC=C1	Neg	PMID: 26948801	Pubmed	Collected from prior studies which focused on developing QSAR models for DILI
641	Darunavir	CC(C)CN(CC(O)C(CC1=CC=CC=C1)NC(=O)OC1COC2OCCC12)S(=O)(=O)C1=CC=C(N)C=C1	Pos	PMID: 26948801	Pubmed	Collected from prior studies which focused on developing QSAR models for DILI
642	Dasatinib	CC1=NC(NC2=NC=C(S2)C(=O)NC2=C(C)C=CC=C2Cl)=CC(=N1)N1CCN(CCO)CC1	Pos	PMID: 21898162	Pubmed	Collected from prior studies which focused on developing QSAR models for DILI
643	Dcb (Dichlorobenzene)	ClC1=CC=C(Cl)C=C1	Pos	PMID: 20843939	Pubmed	Collected from prior studies which focused on developing QSAR models for DILI
644	Decitabine	NC1=NC(=O)N(C=N1)C1CC(O)C(CO)O1	Pos	PMID: 21898162	Pubmed	Collected from prior studies which focused on developing QSAR models for DILI
645	Deferiprone	CN1C=CC(=O)C(O)=C1C	Pos	PMID: 21898162	Pubmed	Collected from prior studies which focused on developing QSAR models for DILI
646	Dehydroepiandrosterone	CC12CCC3C(CC=C4CC(O)CCC34C)C1CCC2=O	Pos	PMID: 24721472	Pubmed	Collected from prior studies which focused on developing QSAR models for DILI
647	Delapril	CCOC(=O)C(CCC1=CC=CC=C1)NC(C)C(=O)N(CC(O)=O)C1CC2=CC=CC=C2C1	Pos	PMID: 21898162	Pubmed	Collected from prior studies which focused on developing QSAR models for DILI
648	Delavirdine	CC(C)NC1=CC=CN=C1N1CCN(CC1)C(=O)C1=CC2=CC(NS(C)(=O)=O)=CC=C2N1	Pos	PMID: 21898162	Pubmed	Collected from prior studies which focused on developing QSAR models for DILI
649	Demeclocycline Hcl	CN(C)C1C2CC3C(O)C4=C(Cl)C=CC(O)=C4C(O)=C3C(=O)C2(O)C(=O)C(=C(N)O)C1=O	Pos	PMID: 18524759	Pubmed	Collected from prior studies which focused on developing QSAR models for DILI
650	Deserpidine	COC1C(CC2CN3CCC4=C(NC5=CC=CC=C45)C3CC2C1C(=O)OC)OC(=O)C1=CC(OC)=C(OC)C(OC)=C1	Neg	PMID: 21898162	Pubmed	Collected from prior studies which focused on developing QSAR models for DILI
651	Desloratadine	ClC1=CC=C2C(CCC3=CC=CN=C3C2=C2CCNCC2)=C1	Pos	PMID: 21898162	Pubmed	Collected from prior studies which focused on developing QSAR models for DILI
652	Desoximetasone	CC1CC2C3CCC4=CC(=O)C=CC4(C)C3(F)C(O)CC2(C)C1C(=O)CO	Neg	PMID: 21898162	Pubmed	Collected from prior studies which focused on developing QSAR models for DILI
653	Dexbrompheniramine	CN(C)CCC(C1=CC=C(Br)C=C1)C1=CC=CC=N1	Neg	PMID: 26948801	Pubmed	Collected from prior studies which focused on developing QSAR models for DILI
654	Dexpanthenol	CC(C)(CO)C(O)C(=O)NCCCO	Neg	PMID: 26948801	Pubmed	Collected from prior studies which focused on developing QSAR models for DILI
655	Dextroamphetamine	CC(N)CC1=CC=CC=C1	Neg	PMID: 26948801	Pubmed	Collected from prior studies which focused on developing QSAR models for DILI
656	Dextromethorphan	COC1=CC2=C(CC3C4CCCCC24CCN3C)C=C1	Neg	PMID: 26948801	Pubmed	Collected from prior studies which focused on developing QSAR models for DILI
657	Dezocine	CC12CCCCCC(CC3=CC=C(O)C=C13)C2N	Neg	PMID: 21898162	Pubmed	Collected from prior studies which focused on developing QSAR models for DILI
658	Dfmo	NCCCC(N)(C(F)F)C(O)=O	Neg	PMID: 22194678	Pubmed	Collected from prior studies which focused on developing QSAR models for DILI
659	Diacerein	CC(=O)OC1=CC=CC2=C1C(=O)C1=C(OC(C)=O)C=C(C=C1C2=O)C(O)=O	Pos	PMID: 21898162	Pubmed	Collected from prior studies which focused on developing QSAR models for DILI
660	Diazepam	CN1C2=CC=C(Cl)C=C2C(=NCC1=O)C1=CC=CC=C1	Neg	PMID: 23456678	Pubmed	Collected from prior studies which focused on developing QSAR models for DILI
661	Diaziquone	CCOC(=O)NC1=C(N2CC2)C(=O)C(NC(=O)OCC)=C(N2CC2)C1=O	Pos	PMID: 21898162	Pubmed	Collected from prior studies which focused on developing QSAR models for DILI
662	Dicloxacillin	CC1=C(C(=O)NC2C3SC(C)(C)C(N3C2=O)C(O)=O)C(=NO1)C1=C(Cl)C=CC=C1Cl	Pos	PMID: 23456678	Pubmed	Collected from prior studies which focused on developing QSAR models for DILI
663	Dicumarol	OC1=C(CC2=C(O)OC3=CC=CC=C3C2=O)C(=O)C2=CC=CC=C2O1	Neg	PMID: 21898162	Pubmed	Collected from prior studies which focused on developing QSAR models for DILI
664	Didanosine	OCC1CCC(O1)N1C=NC2=C1NC=NC2=O	Pos	PMID: 23456678	Pubmed	Collected from prior studies which focused on developing QSAR models for DILI
665	Dienestrol	CC=C(C(=CC)C1=CC=C(O)C=C1)C1=CC=C(O)C=C1	Neg	PMID: 21898162	Pubmed	Collected from prior studies which focused on developing QSAR models for DILI
666	Diethylpropion	CCN(CC)C(C)C(=O)C1=CC=CC=C1	Neg	PMID: 23456678	Pubmed	Collected from prior studies which focused on developing QSAR models for DILI
667	Diethylstilbestrol	CCC(=C(CC)C1=CC=C(O)C=C1)C1=CC=C(O)C=C1	Pos	PMID: 21898162	Pubmed	Collected from prior studies which focused on developing QSAR models for DILI
668	Difluoropentane	CCCCC(F)F	Pos	PMID: 20843939	Pubmed	Collected from prior studies which focused on developing QSAR models for DILI
669	Difluprednate	CCCC(=O)OC1(CCC2C3CC(F)C4=CC(=O)C=CC4(C)C3(F)C(O)CC12C)C(=O)COC(C)=O	Neg	PMID: 21898162	Pubmed	Collected from prior studies which focused on developing QSAR models for DILI
670	Digitoxin	CC1OC(CC(O)C1O)OC1C(O)CC(OC2C(O)CC(OC3CCC4(C)C(CCC5C4CCC4(C)C(CCC54O)C4=CC(=O)OC4)C3)OC2C)OC1C	Neg	PMID: 21898162	Pubmed	Collected from prior studies which focused on developing QSAR models for DILI
671	Dihydralazine	NNC1=C2C=CC=CC2=C(NN)N=N1	Pos	PMID: 21898162	Pubmed	Collected from prior studies which focused on developing QSAR models for DILI
672	Dinoprost	CCCCCC(O)C=CC1C(O)CC(O)C1CC=CCCCC(O)=O	Neg	PMID: 21898162	Pubmed	Collected from prior studies which focused on developing QSAR models for DILI
673	Di-N-Pentyl-Phthalate	CCCCCOC(=O)C1=CC=CC=C1C(=O)OCCCCC	Pos	PMID: 20843939	Pubmed	Collected from prior studies which focused on developing QSAR models for DILI
674	Dioxane	C1COCCO1	Pos	PMID: 21898162	Pubmed	Collected from prior studies which focused on developing QSAR models for DILI
675	Diphenidol	OC(CCCN1CCCCC1)(C1=CC=CC=C1)C1=CC=CC=C1	Neg	PMID: 21898162	Pubmed	Collected from prior studies which focused on developing QSAR models for DILI
676	Diphenoxylate	CCOC(=O)C1(CCN(CCC(C#N)(C2=CC=CC=C2)C2=CC=CC=C2)CC1)C1=CC=CC=C1	Neg	PMID: 26948801	Pubmed	Collected from prior studies which focused on developing QSAR models for DILI
677	Diphenyl	S(C1=CC=CC=C1)C1=CC=CC=C1	Pos	PMID: 21898162	Pubmed	Collected from prior studies which focused on developing QSAR models for DILI
678	Dipivefrin	CNCC(O)C1=CC=C(OC(=O)C(C)(C)C)C(OC(=O)C(C)(C)C)=C1	Neg	PMID: 20192250	Pubmed	Collected from prior studies which focused on developing QSAR models for DILI
679	Diquat Dibromide	C1C[N+]2=CC=CC=C2C2=CC=CC=[N+]12	Pos	PMID: 21898162	Pubmed	Collected from prior studies which focused on developing QSAR models for DILI
680	Disopyramide Phosphate	CC(C)NCCC(C(N)=O)(C1=CC=CC=C1)C1=CC=CC=N1	Pos	PMID: 18524759	Pubmed	Collected from prior studies which focused on developing QSAR models for DILI
681	Disul-Sodium	OS(=O)(=O)OCCOC1=CC=C(Cl)C=C1Cl	Pos	PMID: 21898162	Pubmed	Collected from prior studies which focused on developing QSAR models for DILI
682	Dobutamine	CC(CCC1=CC=C(O)C=C1)NCCC1=CC(O)=C(O)C=C1	Neg	PMID: 26948801	Pubmed	Collected from prior studies which focused on developing QSAR models for DILI
683	Docosahexaenoic Acid	CCC=CCC=CCC=CCC=CCC=CCC=CCCC(O)=O	Neg	PMID: 23456678	Pubmed	Collected from prior studies which focused on developing QSAR models for DILI
684	Docusate	CCCCC(CC)COC(=O)CC(C(=O)OCC(CC)CCCC)S(O)(=O)=O	Neg	PMID: 23456678	Pubmed	Collected from prior studies which focused on developing QSAR models for DILI
685	Domperidone	ClC1=CC2=C(C=C1)N(C1CCN(CCCN3C(=O)NC4=CC=CC=C34)CC1)C(=O)N2	Neg	PMID: 22194678	Pubmed	Collected from prior studies which focused on developing QSAR models for DILI
686	Doripenem	CC(O)C1C2C(C)C(SC3CNC(CNS(N)(=O)=O)C3)=C(N2C1=O)C(O)=O	Pos	PMID: 21898162	Pubmed	Collected from prior studies which focused on developing QSAR models for DILI
687	Doxepin	CN(C)CCC=C1C2=CC=CC=C2OCC2=C1C=CC=C2	Pos	PMID: 20192250	Pubmed	Collected from prior studies which focused on developing QSAR models for DILI
688	Doxercalciferol	CC(C)C(C)C=CC(C)C1CCC2C(CCCC12C)=CC=C1CC(O)CC(O)C1=C	Neg	PMID: 21898162	Pubmed	Collected from prior studies which focused on developing QSAR models for DILI
689	Droloxifene	CCC(=C(C1=CC=C(OCCN(C)C)C=C1)C1=CC=CC(O)=C1)C1=CC=CC=C1	Pos	PMID: 21898162	Pubmed	Collected from prior studies which focused on developing QSAR models for DILI
690	Dronabinol	CCCCCC1=CC(O)=C2C3C=C(C)CCC3C(C)(C)OC2=C1	Neg	PMID: 23456678	Pubmed	Collected from prior studies which focused on developing QSAR models for DILI
691	Droperidol	FC1=CC=C(C=C1)C(=O)CCCN1CCC(=CC1)N1C(=O)NC2=CC=CC=C12	Neg	PMID: 26948801	Pubmed	Collected from prior studies which focused on developing QSAR models for DILI
692	Dutasteride	CC12CCC3C(CCC4NC(=O)C=CC34C)C1CCC2C(=O)NC1=C(C=CC(=C1)C(F)(F)F)C(F)(F)F	Neg	PMID: 23456678	Pubmed	Collected from prior studies which focused on developing QSAR models for DILI
693	Dyclonine	CCCCOC1=CC=C(C=C1)C(=O)CCN1CCCCC1	Neg	PMID: 21898162	Pubmed	Collected from prior studies which focused on developing QSAR models for DILI
694	Echothiophate	CCOP(=O)(OCC)SCC[N+](C)(C)C	Neg	PMID: 21898162	Pubmed	Collected from prior studies which focused on developing QSAR models for DILI
695	Edatrexate	CCC(CC1=NC2=C(N)N=C(N)N=C2N=C1)C1=CC=C(C=C1)C(=O)NC(CCC(O)=O)C(O)=O	Pos	PMID: 21898162	Pubmed	Collected from prior studies which focused on developing QSAR models for DILI
696	Edrophonium	CC[N+](C)(C)C1=CC(O)=CC=C1	Neg	PMID: 26948801	Pubmed	Collected from prior studies which focused on developing QSAR models for DILI
697	Eicosapentaenoic Acid	CCC=CCC=CCC=CCC=CCC=CCCCC(O)=O	Neg	PMID: 23456678	Pubmed	Collected from prior studies which focused on developing QSAR models for DILI
698	Eletriptan	CN1CCCC1CC1=CNC2=CC=C(CCS(=O)(=O)C3=CC=CC=C3)C=C12	Neg	PMID: 23456678	Pubmed	Collected from prior studies which focused on developing QSAR models for DILI
699	Eliglustat	CCCCCCCC(=O)NC(CN1CCCC1)C(O)C1=CC2=C(OCCO2)C=C1	Neg	PMID: 23456678	Pubmed	Collected from prior studies which focused on developing QSAR models for DILI
700	Enalapril	CCOC(=O)C(CCC1=CC=CC=C1)NC(C)C(=O)N1CCCC1C(O)=O	Pos	PMID: 23456678	Pubmed	Collected from prior studies which focused on developing QSAR models for DILI
701	Enoximone	CSC1=CC=C(C=C1)C(=O)C1=C(C)NC(=O)N1	Pos	PMID: 21898162	Pubmed	Collected from prior studies which focused on developing QSAR models for DILI
702	Epalrestat	CC(C=C1SC(=S)N(CC(O)=O)C1=O)=CC1=CC=CC=C1	Pos	PMID: 21898162	Pubmed	Collected from prior studies which focused on developing QSAR models for DILI
703	Epoetin Alfa	OC(=O)C(CC(=O)CNC(=O)C1=CC=CC=C1)CC1=CC=CC=C1	Neg	PMID: 26948801	Pubmed	Collected from prior studies which focused on developing QSAR models for DILI
704	Epoprostenol	CCCCCC(O)C=CC1C(O)CC2OC(CC12)=CCCCC(O)=O	Neg	PMID: 23456678	Pubmed	Collected from prior studies which focused on developing QSAR models for DILI
705	Eprosartan	CCCCC1=NC=C(C=C(CC2=CC=CS2)C(O)=O)N1CC1=CC=C(C=C1)C(O)=O	Neg	PMID: 20843939	Pubmed	Collected from prior studies which focused on developing QSAR models for DILI
706	Eptifibatide	NC(N)=NCCCCC1NC(=O)CCSSCC(NC(=O)C2CCCN2C(=O)C(CC2=CNC3=CC=CC=C23)NC(=O)C(CC(O)=O)NC(=O)CNC1=O)C(N)=O	Neg	PMID: 26948801	Pubmed	Collected from prior studies which focused on developing QSAR models for DILI
707	Ergoloid Mesylates	CCC(C)(C)C1N2C(=O)C(NC(=O)C3CC4C(CC5=CNC6=CC=CC4=C56)N(C)C3)(OC2(O)C2CCCN2C1=O)C(C)C	Neg	PMID: 21898162	Pubmed	Collected from prior studies which focused on developing QSAR models for DILI
708	Erlotinib	COCCOC1=C(OCCOC)C=C2C(NC3=CC=CC(=C3)C#C)=NC=NC2=C1	Pos	PMID: 23456678	Pubmed	Collected from prior studies which focused on developing QSAR models for DILI
709	Ertapenem	CC(O)C1C2C(C)C(SC3CNC(C3)C(=O)NC3=CC=CC(=C3)C(O)=O)=C(N2C1=O)C(O)=O	Pos	PMID: 21898162	Pubmed	Collected from prior studies which focused on developing QSAR models for DILI
710	Erythrityl Tetranitrate	O=N(=O)OCC(ON(=O)=O)C(CON(=O)=O)ON(=O)=O	Pos	PMID: 21898162	Pubmed	Collected from prior studies which focused on developing QSAR models for DILI
711	Erythromycin Acistrate	CCC1OC(=O)C(C)C(OC2CC(C)(OC)C(O)C(C)O2)C(C)C(OC2OC(C)CC(C2OC(C)=O)N(C)C)C(C)(O)CC(C)C(=O)C(C)C(O)C1(C)O	Pos	PMID: 20192250	Pubmed	Collected from prior studies which focused on developing QSAR models for DILI
712	Erythromycin Propionate	CCC1OC(=O)C(C)C(OC2CC(C)(OC)C(O)C(C)O2)C(C)C(OC2OC(C)CC(C2OC(=O)CC)N(C)C)C(C)(O)CC(C)C(=O)C(C)C(O)C1(C)O	Pos	PMID: 20192250	Pubmed	Collected from prior studies which focused on developing QSAR models for DILI
713	Esmolol	COC(=O)CCC1=CC=C(OCC(O)CNC(C)C)C=C1	Neg	PMID: 23456678	Pubmed	Collected from prior studies which focused on developing QSAR models for DILI
714	Esomeprazole	COC1=CC=C2N=C(NC2=C1)S(=O)CC1=NC=C(C)C(OC)=C1C	Pos	PMID: 23456678	Pubmed	Collected from prior studies which focused on developing QSAR models for DILI
715	Estazolam	ClC1=CC2=C(C=C1)N1C=NN=C1CN=C2C1=CC=CC=C1	Neg	PMID: 23456678	Pubmed	Collected from prior studies which focused on developing QSAR models for DILI
716	Estradiol Benzoate	CC12CCC3C(CCC4=CC(OC(=O)C5=CC=CC=C5)=CC=C34)C1CCC2O	Neg	PMID: 20192250	Pubmed	Collected from prior studies which focused on developing QSAR models for DILI
717	Estradiol Cypionate	CC12CCC3C(CCC4=CC(O)=CC=C34)C1CCC2OC(=O)CCC1CCCCC1	Neg	PMID: 20192250	Pubmed	Collected from prior studies which focused on developing QSAR models for DILI
718	Estradiol Dipropionate	CCC(=O)OC1CCC2C3CCC4=CC(OC(=O)CC)=CC=C4C3CCC12C	Neg	PMID: 20192250	Pubmed	Collected from prior studies which focused on developing QSAR models for DILI
719	Estradiol Mustard	CC12CCC3C(CCC4=C3C=CC(OC(=O)C3=CC=C(C=C3)N(CCCl)CCCl)=C4)C1CCC2OC(=O)C1=CC=C(C=C1)N(CCCl)CCCl	Neg	PMID: 20192250	Pubmed	Collected from prior studies which focused on developing QSAR models for DILI
720	Estradiol Undecylate	CCCCCCCCCCC(=O)OC1CCC2C3CCC4=CC(O)=CC=C4C3CCC12C	Neg	PMID: 20192250	Pubmed	Collected from prior studies which focused on developing QSAR models for DILI
721	Estradiol Valerate	CCCC(=O)OC1CCC2C3CCC4=CC(O)=CC=C4C3CCC12C	Neg	PMID: 20192250	Pubmed	Collected from prior studies which focused on developing QSAR models for DILI
722	Estramustine	CC12CCC3C(CCC4=C3C=CC(OC(=O)N(CCCl)CCCl)=C4)C1CCC2O	Pos	PMID: 26948801	Pubmed	Collected from prior studies which focused on developing QSAR models for DILI
723	Estrone	CC12CCC3C(CCC4=C3C=CC(OS(O)(=O)=O)=C4)C1CCC2=O	Pos	PMID: 18524759	Pubmed	Collected from prior studies which focused on developing QSAR models for DILI
724	Etanidazole	OCCNC(=O)CN1C=CN=C1N(=O)=O	Pos	PMID: 21898162	Pubmed	Collected from prior studies which focused on developing QSAR models for DILI
725	Ethchlorvynol	CCC(O)(C=CCl)C#C	Pos	PMID: 21898162	Pubmed	Collected from prior studies which focused on developing QSAR models for DILI
726	Ethionamide	CCC1=CC(=CC=N1)C(N)=S	Pos	PMID: 21898162	Pubmed	Collected from prior studies which focused on developing QSAR models for DILI
727	Ethylenediaminetetraacetic Acid	OC(=O)CN(CCN(CC(O)=O)CC(O)=O)CC(O)=O	Neg	PMID: 22194678	Pubmed	Collected from prior studies which focused on developing QSAR models for DILI
728	Etidocaine	CCCN(CC)C(CC)C(=O)NC1=C(C)C=CC=C1C	Neg	PMID: 21898162	Pubmed	Collected from prior studies which focused on developing QSAR models for DILI
729	Etoposide	COC1=CC(=CC(OC)=C1O)C1C2C(COC2=O)C(OC2OC3COC(C)OC3C(O)C2O)C2=C1C=C1OCOC1=C2	Neg	PMID: 20192250	Pubmed	Collected from prior studies which focused on developing QSAR models for DILI
730	Etretinate	CCOC(=O)C=C(C)C=CC=C(C)C=CC1=C(C)C=C(OC)C(C)=C1C	Pos	PMID: 23456678	Pubmed	Collected from prior studies which focused on developing QSAR models for DILI
731	Exisulind	CC1=C(CC(O)=O)C2=CC(F)=CC=C2C1=CC1=CC=C(C=C1)S(C)(=O)=O	Pos	PMID: 21898162	Pubmed	Collected from prior studies which focused on developing QSAR models for DILI
732	Ezetimibe	OC(CCC1C(N(C1=O)C1=CC=C(F)C=C1)C1=CC=C(O)C=C1)C1=CC=C(F)C=C1	Pos	PMID: 21898162	Pubmed	Collected from prior studies which focused on developing QSAR models for DILI
733	Famciclovir	CC(=O)OCC(CCN1C=NC2=CN=C(N)N=C12)COC(C)=O	Neg	PMID: 23456678	Pubmed	Collected from prior studies which focused on developing QSAR models for DILI
734	Fccp	FC(F)(F)OC1=CC=C(NN=C(C#N)C#N)C=C1	Pos	PMID: 18524759	Pubmed	Collected from prior studies which focused on developing QSAR models for DILI
735	Fenbufen	OC(=O)CCC(=O)C1=CC=C(C=C1)C1=CC=CC=C1	Pos	PMID: 21898162	Pubmed	Collected from prior studies which focused on developing QSAR models for DILI
736	Fenoldopam	OC1=CC=C(C=C1)C1CNCCC2=C(Cl)C(O)=C(O)C=C12	Neg	PMID: 26948801	Pubmed	Collected from prior studies which focused on developing QSAR models for DILI
737	Fenretinide	CC(C=CC1=C(C)CCCC1(C)C)=CC=CC(C)=CC(=O)NC1=CC=C(O)C=C1	Pos	PMID: 21898162	Pubmed	Collected from prior studies which focused on developing QSAR models for DILI
738	Fentanyl	CCC(=O)N(C1CCN(CCC2=CC=CC=C2)CC1)C1=CC=CC=C1	Neg	PMID: 23456678	Pubmed	Collected from prior studies which focused on developing QSAR models for DILI
739	Fentiazac	OC(=O)CC1=C(N=C(S1)C1=CC=CC=C1)C1=CC=C(Cl)C=C1	Pos	PMID: 21898162	Pubmed	Collected from prior studies which focused on developing QSAR models for DILI
740	Fexofenadine	CC(C)(C(O)=O)C1=CC=C(C=C1)C(O)CCCN1CCC(CC1)C(O)(C1=CC=CC=C1)C1=CC=CC=C1	Neg	PMID: 23456678	Pubmed	Collected from prior studies which focused on developing QSAR models for DILI
741	Finasteride	CC(C)(C)NC(=O)C1CCC2C3CCC4NC(=O)C=CC4(C)C3CCC12C	Neg	PMID: 23456678	Pubmed	Collected from prior studies which focused on developing QSAR models for DILI
742	Fipexide	ClC1=CC=C(OCC(=O)N2CCN(CC3=CC4=C(OCO4)C=C3)CC2)C=C1	Pos	PMID: 26948801	Pubmed	Collected from prior studies which focused on developing QSAR models for DILI
743	Fleroxacin	CN1CCN(CC1)C1=C(F)C=C2C(=O)C(=CN(CCF)C2=C1F)C(O)=O	Pos	PMID: 21898162	Pubmed	Collected from prior studies which focused on developing QSAR models for DILI
744	Flomoxef	COC1(NC(=O)CSC(F)F)C2OCC(CSC3=NN=NN3CCO)=C(N2C1=O)C(O)=O	Pos	PMID: 21898162	Pubmed	Collected from prior studies which focused on developing QSAR models for DILI
745	Floxacillin	CC1=C(C(=O)NC2C3SC(C)(C)C(N3C2=O)C(O)=O)C(=NO1)C1=C(F)C=CC=C1Cl	Pos	PMID: 21898162	Pubmed	Collected from prior studies which focused on developing QSAR models for DILI
746	Floxuridine	OCC1OC(CC1O)N1C=C(F)C(=O)NC1=O	Pos	PMID: 23456678	Pubmed	Collected from prior studies which focused on developing QSAR models for DILI
747	Flumequine	CC1CCC2=C3N1C=C(C(O)=O)C(=O)C3=CC(F)=C2	Pos	PMID: 21898162	Pubmed	Collected from prior studies which focused on developing QSAR models for DILI
748	Flumethasone	CC1CC2C3CC(F)C4=CC(=O)C=CC4(C)C3(F)C(O)CC2(C)C1(O)C(=O)CO	Neg	PMID: 21898162	Pubmed	Collected from prior studies which focused on developing QSAR models for DILI
749	Flunarizine	FC1=CC=C(C=C1)C(N1CCN(CC=CC2=CC=CC=C2)CC1)C1=CC=C(F)C=C1	Neg	PMID: 21898162	Pubmed	Collected from prior studies which focused on developing QSAR models for DILI
750	Flunisolide	CC1(C)OC2CC3C4CC(F)C5=CC(=O)C=CC5(C)C4C(O)CC3(C)C2(O1)C(=O)CO	Neg	PMID: 20192250	Pubmed	Collected from prior studies which focused on developing QSAR models for DILI
751	Fluocinolone Acetonide	CC1(C)OC2CC3C4CC(F)C5=CC(=O)C=CC5(C)C4(F)C(O)CC3(C)C2(O1)C(=O)CO	Neg	PMID: 22194678	Pubmed	Collected from prior studies which focused on developing QSAR models for DILI
752	Fluocinonide	CC(=O)OCC(=O)C12OC(C)(C)OC1CC1C3CC(F)C4=CC(=O)C=CC4(C)C3(F)C(O)CC21C	Neg	PMID: 21898162	Pubmed	Collected from prior studies which focused on developing QSAR models for DILI
753	Fluorescein	OC1=CC2=C(C=C1)C1(OC(=O)C3=CC=CC=C13)C1=C(O2)C=C(O)C=C1	Neg	PMID: 26948801	Pubmed	Collected from prior studies which focused on developing QSAR models for DILI
754	Fluoxymesterone	CC1(O)CCC2C3CCC4=CC(=O)CCC4(C)C3(F)C(O)CC12C	Pos	PMID: 21898162	Pubmed	Collected from prior studies which focused on developing QSAR models for DILI
755	Fluticasone	CCC(=O)OC1(C(C)CC2C3CC(F)C4=CC(=O)C=CC4(C)C3(F)C(O)CC12C)C(=O)SCF	Neg	PMID: 20192250	Pubmed	Collected from prior studies which focused on developing QSAR models for DILI
756	Fluvastatin	CC(C)N1C(C=CC(O)CC(O)CC(O)=O)=C(C2=CC=CC=C12)C1=CC=C(F)C=C1	Pos	PMID: 23456678	Pubmed	Collected from prior studies which focused on developing QSAR models for DILI
757	Formoterol	COC1=CC=C(CC(C)NCC(O)C2=CC=C(O)C(NC=O)=C2)C=C1	Neg	PMID: 23456678	Pubmed	Collected from prior studies which focused on developing QSAR models for DILI
758	Fosaprepitant	CC(OC1OCCN(CC2=NC(=O)N(N2)P(O)(O)=O)C1C1=CC=C(F)C=C1)C1=CC(=CC(=C1)C(F)(F)F)C(F)(F)F	Pos	PMID: 21898162	Pubmed	Collected from prior studies which focused on developing QSAR models for DILI
759	Fosphenytoin	OP(O)(=O)OCN1C(=O)NC(C1=O)(C1=CC=CC=C1)C1=CC=CC=C1	Pos	PMID: 26948801	Pubmed	Collected from prior studies which focused on developing QSAR models for DILI
760	Fospropofol	CC(C)C1=CC=CC(C(C)C)=C1OCOP(O)(O)=O	Neg	PMID: 21898162	Pubmed	Collected from prior studies which focused on developing QSAR models for DILI
761	Fotemustine	CCOP(=O)(OCC)C(C)NC(=O)N(CCCl)N=O	Pos	PMID: 21898162	Pubmed	Collected from prior studies which focused on developing QSAR models for DILI
762	Fulvestrant	CC12CCC3C(C1CCC2O)C(CCCCCCCCCS(=O)CCCC(F)(F)C(F)(F)F)CC1=CC(O)=CC=C31	Neg	PMID: 21898162	Pubmed	Collected from prior studies which focused on developing QSAR models for DILI
763	Furazolidone	[O-][N+](=O)C1=CC=C(O1)C=NN1CCOC1=O	Pos	PMID: 18524759	Pubmed	Collected from prior studies which focused on developing QSAR models for DILI
764	Gaba	NCCCC(O)=O	Neg	PMID: 22194678	Pubmed	Collected from prior studies which focused on developing QSAR models for DILI
765	Gabexate	CCOC(=O)C1=CC=C(OC(=O)CCCCCN=C(N)N)C=C1	Pos	PMID: 21898162	Pubmed	Collected from prior studies which focused on developing QSAR models for DILI
766	Gadodiamide	CNC(=O)CN(CCN(CCN(CC(O)=O)CC(=O)NC)CC(O)=O)CC(O)=O	Neg	PMID: 21898162	Pubmed	Collected from prior studies which focused on developing QSAR models for DILI
767	Gadoversetamide	COCCNC(=O)CN(CCN(CCN(CC(O)=O)CC(=O)NCCOC)CC(O)=O)CC(O)=O	Neg	PMID: 21898162	Pubmed	Collected from prior studies which focused on developing QSAR models for DILI
768	Gallamine Triethiodide	CC[N+](CC)(CC)CCOC1=CC=CC(OCC[N+](CC)(CC)CC)=C1OCC[N+](CC)(CC)CC	Neg	PMID: 18524759	Pubmed	Collected from prior studies which focused on developing QSAR models for DILI
769	Ganciclovir	NC1=NC(=O)C2=C(N1)N(COC(CO)CO)C=N2	Neg	PMID: 23456678	Pubmed	Collected from prior studies which focused on developing QSAR models for DILI
770	Gemifloxacin	CON=C1CN(CC1CN)C1=C(F)C=C2C(=O)C(=CN(C3CC3)C2=N1)C(O)=O	Pos	PMID: 21898162	Pubmed	Collected from prior studies which focused on developing QSAR models for DILI
771	Gentamycin	CNC(C)C1CCC(N)C(OC2C(N)CC(N)C(OC3OCC(C)(O)C(NC)C3O)C2O)O1	Neg	PMID: 20553011	Pubmed	Collected from prior studies which focused on developing QSAR models for DILI
772	Gentian Violet	CN(C)C1=CC=C(C=C1)C(C1=CC=C(C=C1)N(C)C)=C1C=CC(C=C1)=[N+](C)C	Neg	PMID: 21898162	Pubmed	Collected from prior studies which focused on developing QSAR models for DILI
773	Glafenine	OCC(O)COC(=O)C1=CC=CC=C1NC1=C2C=CC(Cl)=CC2=NC=C1	Pos	PMID: 26948801	Pubmed	Collected from prior studies which focused on developing QSAR models for DILI
774	Glyburide	COC1=CC=C(Cl)C=C1C(=O)NCCC1=CC=C(C=C1)S(=O)(=O)NC(=O)NC1CCCCC1	Pos	PMID: 23456678	Pubmed	Collected from prior studies which focused on developing QSAR models for DILI
775	Glycopyrrolate	C[N+]1(C)CCC(C1)OC(=O)C(O)(C1CCCC1)C1=CC=CC=C1	Neg	PMID: 26948801	Pubmed	Collected from prior studies which focused on developing QSAR models for DILI
776	Grepafloxacin	CC1CN(CCN1)C1=C(F)C(C)=C2C(=O)C(=CN(C3CC3)C2=C1)C(O)=O	Pos	PMID: 20843939	Pubmed	Collected from prior studies which focused on developing QSAR models for DILI
777	Guaifenesin	COC1=CC=CC=C1OCC(O)CO	Neg	PMID: 26948801	Pubmed	Collected from prior studies which focused on developing QSAR models for DILI
778	Guanadrel	NC(N)=NCC1COC2(CCCCC2)O1	Neg	PMID: 21898162	Pubmed	Collected from prior studies which focused on developing QSAR models for DILI
779	Gusperimus	NCCCNCCCCNC(=O)C(O)NC(=O)CCCCCCN=C(N)N	Neg	PMID: 21898162	Pubmed	Collected from prior studies which focused on developing QSAR models for DILI
780	Halcinonide	CC1(C)OC2CC3C4CCC5=CC(=O)CCC5(C)C4(F)C(O)CC3(C)C2(O1)C(=O)CCl	Neg	PMID: 21898162	Pubmed	Collected from prior studies which focused on developing QSAR models for DILI
781	Halobetasol	CCC(=O)OC1(C(C)CC2C3CC(F)C4=CC(=O)C=CC4(C)C3(F)C(O)CC12C)C(=O)CCl	Neg	PMID: 20192250	Pubmed	Collected from prior studies which focused on developing QSAR models for DILI
782	Haloprogin	ClC1=CC(Cl)=C(OCC#CI)C=C1Cl	Neg	PMID: 24721472	Pubmed	Collected from prior studies which focused on developing QSAR models for DILI
783	Heptachlor	ClC1C=CC2C1C1(Cl)C(Cl)=C(Cl)C2(Cl)C1(Cl)Cl	Pos	PMID: 21898162	Pubmed	Collected from prior studies which focused on developing QSAR models for DILI
784	Hexachlorobenzene	ClC1=C(Cl)C(Cl)=C(Cl)C(Cl)=C1Cl	Pos	PMID: 21699217	Pubmed	Collected from prior studies which focused on developing QSAR models for DILI
785	Hexafluorenium	C[N+](C)(CCCCCC[N+](C)(C)C1C2=CC=CC=C2C2=CC=CC=C12)C1C2=CC=CC=C2C2=CC=CC=C12	Neg	PMID: 21898162	Pubmed	Collected from prior studies which focused on developing QSAR models for DILI
786	Homatropine	CN1C2CCC1CC(C2)OC(=O)C(O)C1=CC=CC=C1	Neg	PMID: 23456678	Pubmed	Collected from prior studies which focused on developing QSAR models for DILI
787	Hydralazine	NNC1=C2C=CC=CC2=CN=N1	Pos	PMID: 23456678	Pubmed	Collected from prior studies which focused on developing QSAR models for DILI
788	Hydrochlorothiazide	NS(=O)(=O)C1=C(Cl)C=C2NCNS(=O)(=O)C2=C1	Pos	PMID: 18524759	Pubmed	Collected from prior studies which focused on developing QSAR models for DILI
789	Hydrocodone	COC1=C2OC3C(=O)CCC4C5CC(C=C1)=C2C34CCN5C	Neg	PMID: 23997115	Pubmed	Collected from prior studies which focused on developing QSAR models for DILI
790	Hydroquinidine	CCC1CN2CCC1CC2C(O)C1=CC=NC2=CC=C(OC)C=C12	Pos	PMID: 21898162	Pubmed	Collected from prior studies which focused on developing QSAR models for DILI
791	Ibandronate	CCCCCN(C)CCC(O)(P(O)(O)=O)P(O)(O)=O	Neg	PMID: 26948801	Pubmed	Collected from prior studies which focused on developing QSAR models for DILI
792	Ibuprofen	CC(C)CC1=CC=C(C=C1)C(C)C(O)=O	Pos	PMID: 23456678	Pubmed	Collected from prior studies which focused on developing QSAR models for DILI
793	Idarubicin Hcl	CC(O)C1(O)CC(OC2CC(N)C(O)C(C)O2)C2=C(O)C3=C(C(O)=C2C1)C(=O)C1=CC=CC=C1C3=O	Neg	PMID: 18524759	Pubmed	Collected from prior studies which focused on developing QSAR models for DILI
794	Iloperidone	COC1=CC(=CC=C1OCCCN1CCC(CC1)C1=NOC2=CC(F)=CC=C12)C(C)=O	Neg	PMID: 23456678	Pubmed	Collected from prior studies which focused on developing QSAR models for DILI
795	Iloprost	CC#CCC(C)C(O)C=CC1C(O)CC2CC(CC12)=CCCCC(O)=O	Neg	PMID: 23456678	Pubmed	Collected from prior studies which focused on developing QSAR models for DILI
796	Imidapril	CCOC(=O)C(CCC1=CC=CC=C1)NC(C)C(=O)N1C(CN(C)C1=O)C(O)=O	Pos	PMID: 21898162	Pubmed	Collected from prior studies which focused on developing QSAR models for DILI
797	Indapamide	CC1CC2=CC=CC=C2N1NC(=O)C1=CC=C(Cl)C(=C1)S(N)(=O)=O	Neg	PMID: 23456678	Pubmed	Collected from prior studies which focused on developing QSAR models for DILI
798	Indene	C1C=CC2=CC=CC=C12	Pos	PMID: 21898162	Pubmed	Collected from prior studies which focused on developing QSAR models for DILI
799	Iobenguane I131	NC(N)=NCC1=CC=CC([131I])=C1	Pos	PMID: 21898162	Pubmed	Collected from prior studies which focused on developing QSAR models for DILI
800	Iobitridol	CN(CC(O)CO)C(=O)C1=C(I)C(C(=O)N(C)CC(O)CO)=C(I)C(NC(=O)C(CO)CO)=C1I	Neg	PMID: 21898162	Pubmed	Collected from prior studies which focused on developing QSAR models for DILI
801	Iocetamic Acid	CC(CN(C(C)=O)C1=C(I)C=C(I)C(N)=C1I)C(O)=O	Neg	PMID: 21898162	Pubmed	Collected from prior studies which focused on developing QSAR models for DILI
802	Iodamide	CC(=O)NCC1=C(I)C(NC(C)=O)=C(I)C(C(O)=O)=C1I	Neg	PMID: 21898162	Pubmed	Collected from prior studies which focused on developing QSAR models for DILI
803	Iohexol	CC(=O)N(CC(O)CO)C1=C(I)C(C(=O)NCC(O)CO)=C(I)C(C(=O)NCC(O)CO)=C1I	Neg	PMID: 20192250	Pubmed	Collected from prior studies which focused on developing QSAR models for DILI
804	Iopanoic Acid	CCC(CC1=C(I)C=C(I)C(N)=C1I)C(O)=O	Neg	PMID: 21898162	Pubmed	Collected from prior studies which focused on developing QSAR models for DILI
805	Iophendylate	CCOC(=O)CCCCCCCCC(C)C1=CC=CC=C1I	Neg	PMID: 21898162	Pubmed	Collected from prior studies which focused on developing QSAR models for DILI
806	Iopromide	COCC(=O)NC1=C(I)C(C(=O)NCC(O)CO)=C(I)C(C(=O)N(C)CC(O)CO)=C1I	Neg	PMID: 20192250	Pubmed	Collected from prior studies which focused on developing QSAR models for DILI
807	Ioxilan	CC(=O)N(CC(O)CO)C1=C(I)C(C(=O)NCCO)=C(I)C(C(=O)NCC(O)CO)=C1I	Neg	PMID: 21898162	Pubmed	Collected from prior studies which focused on developing QSAR models for DILI
808	Ipodate	CN(C)C=NC1=C(I)C=C(I)C(CCC(O)=O)=C1I	Neg	PMID: 21898162	Pubmed	Collected from prior studies which focused on developing QSAR models for DILI
809	Ipratropium Bromide	CC(C)[N+]1(C)C2CCC1CC(C2)OC(=O)C(CO)C1=CC=CC=C1	Neg	PMID: 20192250	Pubmed	Collected from prior studies which focused on developing QSAR models for DILI
810	Isoetharine	CCC(NC(C)C)C(O)C1=CC=C(O)C(O)=C1	Neg	PMID: 21898162	Pubmed	Collected from prior studies which focused on developing QSAR models for DILI
811	Isoflurophate	CC(C)OP(F)(=O)OC(C)C	Neg	PMID: 21898162	Pubmed	Collected from prior studies which focused on developing QSAR models for DILI
812	Isonicotinic	OC(=O)C1=CC=NC=C1	Neg	PMID: 20553011	Pubmed	Collected from prior studies which focused on developing QSAR models for DILI
813	Isopropamide	CC(C)[N+](C)(CCC(C(N)=O)(C1=CC=CC=C1)C1=CC=CC=C1)C(C)C	Neg	PMID: 21898162	Pubmed	Collected from prior studies which focused on developing QSAR models for DILI
814	Isosorbide Mononitrate	OC1COC2C(COC12)O[N+]([O-])=O	Neg	PMID: 23456678	Pubmed	Collected from prior studies which focused on developing QSAR models for DILI
815	Isoxicam	CN1C(=C(O)NC2=NOC(C)=C2)C(=O)C2=CC=CC=C2S1(=O)=O	Neg	PMID: 20843939	Pubmed	Collected from prior studies which focused on developing QSAR models for DILI
816	Isoxsuprine	CC(COC1=CC=CC=C1)NC(C)C(O)C1=CC=C(O)C=C1	Neg	PMID: 26948801	Pubmed	Collected from prior studies which focused on developing QSAR models for DILI
817	Isradipine	COC(=O)C1=C(C)NC(C)=C(C1C1=CC=CC2=NON=C12)C(=O)OC(C)C	Neg	PMID: 23456678	Pubmed	Collected from prior studies which focused on developing QSAR models for DILI
818	Ixabepilone	CC1CCCC2(C)OC2CC(NC(=O)CC(O)C(C)(C)C(=O)C(C)C1O)C(C)=CC1=CSC(C)=N1	Neg	PMID: 21898162	Pubmed	Collected from prior studies which focused on developing QSAR models for DILI
819	Josamycin	COC1C(CC(=O)OC(C)CC=CC=CC(O)C(C)CC(CC=O)C1OC1OC(C)C(OC2CC(C)(O)C(OC(=O)CC(C)C)C(C)O2)C(C1O)N(C)C)OC(C)=O	Pos	PMID: 21898162	Pubmed	Collected from prior studies which focused on developing QSAR models for DILI
820	Kanamycin	NCC1OC(OC2C(N)CC(N)C(OC3OC(CO)C(O)C(N)C3O)C2O)C(O)C(O)C1O	Neg	PMID: 26948801	Pubmed	Collected from prior studies which focused on developing QSAR models for DILI
821	Ketamine	CNC1(CCCCC1=O)C1=CC=CC=C1Cl	Pos	PMID: 23456678	Pubmed	Collected from prior studies which focused on developing QSAR models for DILI
822	Khat	CC(N)C(=O)C1=CC=CC=C1	Pos	PMID: 23456678	Pubmed	Collected from prior studies which focused on developing QSAR models for DILI
823	Lacidipine	CCOC(=O)C1=C(C)NC(C)=C(C1C1=CC=CC=C1C=CC(=O)OC(C)(C)C)C(=O)OCC	Pos	PMID: 21898162	Pubmed	Collected from prior studies which focused on developing QSAR models for DILI
824	Lacosamide	COCC(NC(C)=O)C(=O)NCC1=CC=CC=C1	Neg	PMID: 21898162	Pubmed	Collected from prior studies which focused on developing QSAR models for DILI
825	Lactose	OCC1OC(OC2C(O)C(O)C(O)OC2CO)C(O)C(O)C1O	Neg	PMID: 16598496	Pubmed	Collected from prior studies which focused on developing QSAR models for DILI
826	Lamotrigine	NC1=NC(N)=C(N=N1)C1=C(Cl)C(Cl)=CC=C1	Pos	PMID: 26948801	Pubmed	Collected from prior studies which focused on developing QSAR models for DILI
827	Lapatinib	CS(=O)(=O)CCNCC1=CC=C(O1)C1=CC2=C(C=C1)N=CN=C2NC1=CC(Cl)=C(OCC2=CC(F)=CC=C2)C=C1	Pos	PMID: 26948801	Pubmed	Collected from prior studies which focused on developing QSAR models for DILI
828	L-Arginine	NC(CCCN=C(N)N)C(O)=O	Neg	PMID: 26948801	Pubmed	Collected from prior studies which focused on developing QSAR models for DILI
829	Lazabemide	NCCNC(=O)C1=CC=C(Cl)C=N1	Pos	PMID: 21898162	Pubmed	Collected from prior studies which focused on developing QSAR models for DILI
830	Lenalidomide	NC1=CC=CC2=C1CN(C1CCC(=O)NC1=O)C2=O	Pos	PMID: 21898162	Pubmed	Collected from prior studies which focused on developing QSAR models for DILI
831	Levetiracetam	CCC(N1CCCC1=O)C(N)=O	Pos	PMID: 21898162	Pubmed	Collected from prior studies which focused on developing QSAR models for DILI
832	Levobunolol	CC(C)(C)NCC(O)COC1=CC=CC2=C1CCCC2=O	Neg	PMID: 20192250	Pubmed	Collected from prior studies which focused on developing QSAR models for DILI
833	Levocabastine	CC1CN(CCC1(C(O)=O)C1=CC=CC=C1)C1CCC(CC1)(C#N)C1=CC=C(F)C=C1	Neg	PMID: 20192250	Pubmed	Collected from prior studies which focused on developing QSAR models for DILI
834	Levodopa	NC(CC1=CC=C(O)C(O)=C1)C(O)=O	Neg	PMID: 23456678	Pubmed	Collected from prior studies which focused on developing QSAR models for DILI
835	Levofloxacin	CC1COC2=C3N1C=C(C(O)=O)C(=O)C3=CC(F)=C2N1CCN(C)CC1	Pos	PMID: 26948801	Pubmed	Collected from prior studies which focused on developing QSAR models for DILI
836	Liarozole	ClC1=CC=CC(=C1)C(N1C=CN=C1)C1=CC=C2N=CNC2=C1	Pos	PMID: 21898162	Pubmed	Collected from prior studies which focused on developing QSAR models for DILI
837	Lidocaine	CCN(CC)CC(=O)NC1=C(C)C=CC=C1C	Neg	PMID: 23456678	Pubmed	Collected from prior studies which focused on developing QSAR models for DILI
838	Linezolid	CC(=O)NCC1CN(C(=O)O1)C1=CC=C(N2CCOCC2)C(F)=C1	Pos	PMID: 21898162	Pubmed	Collected from prior studies which focused on developing QSAR models for DILI
839	Lisdexamfetamine	CC(CC1=CC=CC=C1)NC(=O)C(N)CCCCN	Neg	PMID: 21898162	Pubmed	Collected from prior studies which focused on developing QSAR models for DILI
840	L-Methionine	CSCCC(N)C(O)=O	Neg	PMID: 26948801	Pubmed	Collected from prior studies which focused on developing QSAR models for DILI
841	Lofepramine	CN(CCCN1C2=CC=CC=C2CCC2=CC=CC=C12)CC(=O)C1=CC=C(Cl)C=C1	Pos	PMID: 21898162	Pubmed	Collected from prior studies which focused on developing QSAR models for DILI
842	Lonidamine	OC(=O)C1=NN(CC2=CC=C(Cl)C=C2Cl)C2=CC=CC=C12	Pos	PMID: 21898162	Pubmed	Collected from prior studies which focused on developing QSAR models for DILI
843	Lorazepam	OC1N=C(C2=CC=CC=C2Cl)C2=CC(Cl)=CC=C2NC1=O	Neg	PMID: 23456678	Pubmed	Collected from prior studies which focused on developing QSAR models for DILI
844	Loteprednol	CC12CC(O)C3C(CCC4=CC(=O)C=CC34C)C1CCC2(O)C(=O)OCCl	Neg	PMID: 21898162	Pubmed	Collected from prior studies which focused on developing QSAR models for DILI
845	Lovastatin	CCC(C)C(=O)OC1CC(C)C=C2C=CC(C)C(CCC3CC(O)CC(=O)O3)C12	Pos	PMID: 23456678	Pubmed	Collected from prior studies which focused on developing QSAR models for DILI
846	Loxapine	CN1CCN(CC1)C1=NC2=CC=CC=C2OC2=CC=C(Cl)C=C12	Pos	PMID: 21898162	Pubmed	Collected from prior studies which focused on developing QSAR models for DILI
847	Lurasidone	O=C1C2C3CCC(C3)C2C(=O)N1CC1CCCCC1CN1CCN(CC1)C1=NSC2=CC=CC=C12	Neg	PMID: 23456678	Pubmed	Collected from prior studies which focused on developing QSAR models for DILI
848	Malathion	CCOC(=O)CC(SP(=S)(OC)OC)C(=O)OCC	Neg	PMID: 21898162	Pubmed	Collected from prior studies which focused on developing QSAR models for DILI
849	Mangafodipir	CC1=NC=C(COP(O)(O)=O)C(CN(CCN(CC(O)=O)CC2=C(COP(O)(O)=O)C=NC(C)=C2O)CC(O)=O)=C1O	Pos	PMID: 21898162	Pubmed	Collected from prior studies which focused on developing QSAR models for DILI
850	Marimastat	CNC(=O)C(NC(=O)C(CC(C)C)C(O)C(=O)NO)C(C)(C)C	Pos	PMID: 21898162	Pubmed	Collected from prior studies which focused on developing QSAR models for DILI
851	Mebendazole	COC(=O)NC1=NC2=C(N1)C=C(C=C2)C(=O)C1=CC=CC=C1	Pos	PMID: 18524759	Pubmed	Collected from prior studies which focused on developing QSAR models for DILI
852	Mecamylamine	CNC1(C)C2CCC(C2)C1(C)C	Neg	PMID: 26948801	Pubmed	Collected from prior studies which focused on developing QSAR models for DILI
853	Meclizine	CC1=CC(CN2CCN(CC2)C(C2=CC=CC=C2)C2=CC=C(Cl)C=C2)=CC=C1	Neg	PMID: 23456678	Pubmed	Collected from prior studies which focused on developing QSAR models for DILI
854	Medroxyprogesterone	CC1CC2C3CCC(O)(C(C)=O)C3(C)CCC2C2(C)CCC(=O)C=C12	Pos	PMID: 21898162	Pubmed	Collected from prior studies which focused on developing QSAR models for DILI
855	Megestrol	CC(=O)C1(O)CCC2C3C=C(C)C4=CC(=O)CCC4(C)C3CCC12C	Pos	PMID: 22194678	Pubmed	Collected from prior studies which focused on developing QSAR models for DILI
856	Melphalan	NC(CC1=CC=C(C=C1)N(CCCl)CCCl)C(O)=O	Pos	PMID: 21898162	Pubmed	Collected from prior studies which focused on developing QSAR models for DILI
857	Menadione	CC1=CC(=O)C2=CC=CC=C2C1=O	Neg	PMID: 23456678	Pubmed	Collected from prior studies which focused on developing QSAR models for DILI
858	Mepenzolate	C[N+]1(C)CCCC(C1)OC(=O)C(O)(C1=CC=CC=C1)C1=CC=CC=C1	Neg	PMID: 26948801	Pubmed	Collected from prior studies which focused on developing QSAR models for DILI
859	Mephenytoin	CCC1(NC(=O)N(C)C1=O)C1=CC=CC=C1	Pos	PMID: 22194678	Pubmed	Collected from prior studies which focused on developing QSAR models for DILI
860	Mepivacaine	CN1CCCCC1C(=O)NC1=C(C)C=CC=C1C	Neg	PMID: 23456678	Pubmed	Collected from prior studies which focused on developing QSAR models for DILI
861	6-Mercaptopurine	SC1=NC=NC2=C1NC=N2	Pos	PMID: 20192250	Pubmed	Collected from prior studies which focused on developing QSAR models for DILI
862	Meropenem	CC(O)C1C2C(C)C(SC3CNC(C3)C(=O)N(C)C)=C(N2C1=O)C(O)=O	Pos	PMID: 20192250	Pubmed	Collected from prior studies which focused on developing QSAR models for DILI
863	Mestranol	COC1=CC=C2C3CCC4(C)C(CCC4(O)C#C)C3CCC2=C1	Pos	PMID: 20843939	Pubmed	Collected from prior studies which focused on developing QSAR models for DILI
864	Metaxalone	CC1=CC(OCC2CNC(=O)O2)=CC(C)=C1	Neg	PMID: 23456678	Pubmed	Collected from prior studies which focused on developing QSAR models for DILI
865	Metergoline	CN1C=C2CC3C(CC(CNC(=O)OCC4=CC=CC=C4)CN3C)C3=C2C1=CC=C3	Pos	PMID: 21898162	Pubmed	Collected from prior studies which focused on developing QSAR models for DILI
866	1-carbamimidamido-N,N-dimethylmethanimidamide	CN(C)C(=N)NC(N)=N	Neg	PMID: 20192250	Pubmed	Collected from prior studies which focused on developing QSAR models for DILI
867	Methacycline Hcl	CN(C)C1C2C(O)C3C(=C)C4=CC=CC(O)=C4C(O)=C3C(=O)C2(O)C(=O)C(=C(N)O)C1=O	Pos	PMID: 18524759	Pubmed	Collected from prior studies which focused on developing QSAR models for DILI
868	Methantheline	CC[N+](C)(CC)CCOC(=O)C1C2=CC=CC=C2OC2=CC=CC=C12	Neg	PMID: 21898162	Pubmed	Collected from prior studies which focused on developing QSAR models for DILI
869	Methapyrilene	CN(C)CCN(CC1=CC=CS1)C1=CC=CC=N1	Pos	PMID: 16598496	Pubmed	Collected from prior studies which focused on developing QSAR models for DILI
870	Methdilazine	CN1CCC(CN2C3=CC=CC=C3SC3=CC=CC=C23)C1	Pos	PMID: 21898162	Pubmed	Collected from prior studies which focused on developing QSAR models for DILI
871	Methenolone	CC(=O)OC1CCC2C3CCC4CC(=O)C=C(C)C4(C)C3CCC12C	Pos	PMID: 21898162	Pubmed	Collected from prior studies which focused on developing QSAR models for DILI
872	Methohexital	CCC#CC(C)C1(CC=C)C(=O)NC(=O)N(C)C1=O	Pos	PMID: 21898162	Pubmed	Collected from prior studies which focused on developing QSAR models for DILI
873	Methomyl	CNC(=O)ON=C(C)SC	Pos	PMID: 21898162	Pubmed	Collected from prior studies which focused on developing QSAR models for DILI
874	Methotrimeprazine	COC1=CC=C2SC3=CC=CC=C3N(CC(C)CN(C)C)C2=C1	Neg	PMID: 21898162	Pubmed	Collected from prior studies which focused on developing QSAR models for DILI
875	Methoxamine Hcl	COC1=CC(C(O)C(C)N)=C(OC)C=C1	Neg	PMID: 18524759	Pubmed	Collected from prior studies which focused on developing QSAR models for DILI
876	Methoxychlor	COC1=CC=C(C=C1)C(C1=CC=C(OC)C=C1)C(Cl)(Cl)Cl	Pos	PMID: 21898162	Pubmed	Collected from prior studies which focused on developing QSAR models for DILI
877	Methylaniline	CNC1=CC=CC=C1	Pos	PMID: 21898162	Pubmed	Collected from prior studies which focused on developing QSAR models for DILI
878	Methylene Dianiline	C(NC1=CC=CC=C1)NC1=CC=CC=C1	Pos	PMID: 20843939	Pubmed	Collected from prior studies which focused on developing QSAR models for DILI
879	Methylscopolamine Bromide	C[N+]1(C)C2CC(CC1C1OC21)OC(=O)C(CO)C1=CC=CC=C1	Neg	PMID: 26948801	Pubmed	Collected from prior studies which focused on developing QSAR models for DILI
880	Methyltestosterone	CC1(O)CCC2C3CCC4=CC(=O)CCC4(C)C3CCC12C	Pos	PMID: 21898162	Pubmed	Collected from prior studies which focused on developing QSAR models for DILI
881	Methysergide	CCC(CO)NC(=O)C1CN(C)C2CC3=CN(C)C4=CC=CC(=C34)C2=C1	Neg	PMID: 26948801	Pubmed	Collected from prior studies which focused on developing QSAR models for DILI
882	Metocurine	COC1=CC=C2CC3C4=C(CC[N+]3(C)C)C=C(OC)C(OC)=C4OC3=CC=C(CC4C5=CC(OC1=C2)=C(OC)C=C5CC[N+]4(C)C)C=C3	Neg	PMID: 21898162	Pubmed	Collected from prior studies which focused on developing QSAR models for DILI
883	Metolazone	CC1NC2=CC(Cl)=C(C=C2C(=O)N1C1=CC=CC=C1C)S(N)(=O)=O	Neg	PMID: 23456678	Pubmed	Collected from prior studies which focused on developing QSAR models for DILI
884	Metribuzin	CSC1=NN=C(C(=O)N1N)C(C)(C)C	Pos	PMID: 21898162	Pubmed	Collected from prior studies which focused on developing QSAR models for DILI
885	Metrizamide	CN(C(C)=O)C1=C(I)C(NC(C)=O)=C(I)C(C(=O)NC2C(O)OC(CO)C(O)C2O)=C1I	Neg	PMID: 21898162	Pubmed	Collected from prior studies which focused on developing QSAR models for DILI
886	Metrizoic Acid	CN(C(C)=O)C1=C(I)C(NC(C)=O)=C(I)C(C(O)=O)=C1I	Neg	PMID: 24721472	Pubmed	Collected from prior studies which focused on developing QSAR models for DILI
887	Metvix	COC(=O)CCC(=O)CN	Neg	PMID: 22194678	Pubmed	Collected from prior studies which focused on developing QSAR models for DILI
888	Metyrapone	CC(C)(C(=O)C1=CN=CC=C1)C1=CN=CC=C1	Neg	PMID: 26948801	Pubmed	Collected from prior studies which focused on developing QSAR models for DILI
889	Mibefradil	COCC(=O)OC1(CCN(C)CCCC2=NC3=CC=CC=C3N2)CCC2=CC(F)=CC=C2C1C(C)C	Neg	PMID: 20843939	Pubmed	Collected from prior studies which focused on developing QSAR models for DILI
890	Midazolam	CC1=NC=C2CN=C(C3=CC=CC=C3F)C3=C(C=CC(Cl)=C3)N12	Neg	PMID: 23456678	Pubmed	Collected from prior studies which focused on developing QSAR models for DILI
891	Miglitol	OCCN1CC(O)C(O)C(O)C1CO	Neg	PMID: 26948801	Pubmed	Collected from prior studies which focused on developing QSAR models for DILI
892	Milnacipran	CCN(CC)C(=O)C1(CC1CN)C1=CC=CC=C1	Pos	PMID: 26948801	Pubmed	Collected from prior studies which focused on developing QSAR models for DILI
893	Miltefosine	CCCCCCCCCCCCCCCCOP(O)(=O)OCC[N+](C)(C)C	Neg	PMID: 23456678	Pubmed	Collected from prior studies which focused on developing QSAR models for DILI
894	Miokamycin	CCC(=O)OC1C(C)OC(CC1(C)OC(C)=O)OC1C(C)OC(OC2C(CC=O)CC(C)C(OC(C)=O)C=CC=CCC(C)OC(=O)CC(OC(=O)CC)C2OC)C(O)C1N(C)C	Neg	PMID: 21898162	Pubmed	Collected from prior studies which focused on developing QSAR models for DILI
895	Misoprostol	CCCCC(C)(O)CC=CC1C(O)CC(=O)C1CCCCCCC(=O)OC	Neg	PMID: 23456678	Pubmed	Collected from prior studies which focused on developing QSAR models for DILI
896	Mitoguazone	CC(C=NN=C(N)N)=NN=C(N)N	Pos	PMID: 21898162	Pubmed	Collected from prior studies which focused on developing QSAR models for DILI
897	Mitolactol	OC(CBr)C(O)C(O)C(O)CBr	Pos	PMID: 21898162	Pubmed	Collected from prior studies which focused on developing QSAR models for DILI
898	Mitotane	ClC(Cl)C(C1=CC=C(Cl)C=C1)C1=CC=CC=C1Cl	Neg	PMID: 26948801	Pubmed	Collected from prior studies which focused on developing QSAR models for DILI
899	M-Nitroaniline	NC1=CC=CC(=C1)N(=O)=O	Pos	PMID: 21898162	Pubmed	Collected from prior studies which focused on developing QSAR models for DILI
900	Moclobemide	ClC1=CC=C(C=C1)C(=O)NCCN1CCOCC1	Pos	PMID: 24721472	Pubmed	Collected from prior studies which focused on developing QSAR models for DILI
901	Mometasone	CC1CC2C3CCC4=CC(=O)C=CC4(C)C3(Cl)C(O)CC2(C)C1(OC(=O)C1=CC=CO1)C(=O)CCl	Neg	PMID: 20192250	Pubmed	Collected from prior studies which focused on developing QSAR models for DILI
902	Mometasone Furoate	CC1CC2C3CCC4=CC(=O)C=CC4(C)C3(Cl)C(O)CC2(C)C1(O)C(=O)CCl	Neg	PMID: 20843939	Pubmed	Collected from prior studies which focused on developing QSAR models for DILI
903	Moxifloxacin	COC1=C2N(C=C(C(O)=O)C(=O)C2=CC(F)=C1N1CC2CCCNC2C1)C1CC1	Pos	PMID: 21898162	Pubmed	Collected from prior studies which focused on developing QSAR models for DILI
904	Moxisylyte	CC(C)C1=C(OCCN(C)C)C=C(C)C(OC(C)=O)=C1	Pos	PMID: 26948801	Pubmed	Collected from prior studies which focused on developing QSAR models for DILI
905	Mupirocin	CC(O)C(C)C1OC1CC1COC(CC(C)=CC(=O)OCCCCCCCCC(O)=O)C(O)C1O	Neg	PMID: 20192250	Pubmed	Collected from prior studies which focused on developing QSAR models for DILI
906	Myo-Inositol	OC1C(O)C(O)C(O)C(O)C1O	Neg	PMID: 16598496	Pubmed	Collected from prior studies which focused on developing QSAR models for DILI
907	N-(3,5-Dichlorophenyl)Succinimide	ClC1=CC(=CC(Cl)=C1)N1C(=O)CCC1=O	Pos	PMID: 20843939	Pubmed	Collected from prior studies which focused on developing QSAR models for DILI
908	N,N-Dimethylacetamide	CN(C)C(C)=O	Pos	PMID: 21898162	Pubmed	Collected from prior studies which focused on developing QSAR models for DILI
909	Nabilone	CCCCCCC(C)(C)C1=CC2=C(C3CC(=O)CCC3C(C)(C)O2)C(O)=C1	Neg	PMID: 26948801	Pubmed	Collected from prior studies which focused on developing QSAR models for DILI
910	Nadolol	CC(C)(C)NCC(O)COC1=CC=CC2=C1CC(O)C(O)C2	Neg	PMID: 23456678	Pubmed	Collected from prior studies which focused on developing QSAR models for DILI
911	Naftifine	CN(CC=CC1=CC=CC=C1)CC1=CC=CC2=C1C=CC=C2	Neg	PMID: 20192250	Pubmed	Collected from prior studies which focused on developing QSAR models for DILI
912	Nalbuphine	OC1CCC2(O)C3CC4=C5C(OC1C25CCN3CC1CCC1)=C(O)C=C4	Neg	PMID: 26948801	Pubmed	Collected from prior studies which focused on developing QSAR models for DILI
913	Naloxegol	[H]C12OC3=C(O)C=CC4=C3C11CCN(CC=C)C(C4)C1(O)CCC2([H])OCCOCCOCCOCCOCCOCCOCCOC	Neg	PMID: 23456678	Pubmed	Collected from prior studies which focused on developing QSAR models for DILI
914	Nandrolone Decanoate	CC12CCC3C(CCC4=CC(=O)CCC34)C1CCC2O	Pos	PMID: 26948801	Pubmed	Collected from prior studies which focused on developing QSAR models for DILI
915	Nelfinavir	CC1=C(O)C=CC=C1C(=O)NC(CSC1=CC=CC=C1)C(O)CN1CC2CCCCC2CC1C(=O)NC(C)(C)C	Pos	PMID: 21898162	Pubmed	Collected from prior studies which focused on developing QSAR models for DILI
916	Niacinamide	NC(=O)C1=CC=CN=C1	Pos	PMID: 21898162	Pubmed	Collected from prior studies which focused on developing QSAR models for DILI
917	Niclosamide	OC1=CC=C(Cl)C=C1C(=O)NC1=CC=C(C=C1Cl)N(=O)=O	Neg	PMID: 21898162	Pubmed	Collected from prior studies which focused on developing QSAR models for DILI
918	Nicotinyl Alcohol	OCC1=CC=CN=C1	Neg	PMID: 24721472	Pubmed	Collected from prior studies which focused on developing QSAR models for DILI
919	Nifedipine	COC(=O)C1=C(C)NC(C)=C(C1C1=CC=CC=C1[N+]([O-])=O)C(=O)OC	Pos	PMID: 23456678	Pubmed	Collected from prior studies which focused on developing QSAR models for DILI
920	Niflumic	OC(=O)C1=CC=CN=C1NC1=CC=CC(=C1)C(F)(F)F	Pos	PMID: 21898162	Pubmed	Collected from prior studies which focused on developing QSAR models for DILI
921	Nilutamide	CC1(C)NC(=O)N(C1=O)C1=CC(=C(C=C1)[N+]([O-])=O)C(F)(F)F	Pos	PMID: 26948801	Pubmed	Collected from prior studies which focused on developing QSAR models for DILI
922	Nilvadipine	COC(=O)C1=C(NC(C)=C(C1C1=CC=CC(=C1)N(=O)=O)C(=O)OC(C)C)C#N	Pos	PMID: 21898162	Pubmed	Collected from prior studies which focused on developing QSAR models for DILI
923	Nimodipine	COCCOC(=O)C1=C(C)NC(C)=C(C1C1=CC=CC(=C1)[N+]([O-])=O)C(=O)OC(C)C	Neg	PMID: 23456678	Pubmed	Collected from prior studies which focused on developing QSAR models for DILI
924	Nitramine	CN(C1=C(C=C(C=C1N(=O)=O)N(=O)=O)N(=O)=O)N(=O)=O	Pos	PMID: 21898162	Pubmed	Collected from prior studies which focused on developing QSAR models for DILI
925	Nitrazepam	[O-][N+](=O)C1=CC2=C(NC(=O)CN=C2C2=CC=CC=C2)C=C1	Neg	PMID: 22194678	Pubmed	Collected from prior studies which focused on developing QSAR models for DILI
926	Nitrendipine	CCOC(=O)C1=C(C)NC(C)=C(C1C1=CC=CC(=C1)N(=O)=O)C(=O)OC	Pos	PMID: 21898162	Pubmed	Collected from prior studies which focused on developing QSAR models for DILI
927	Nitrofurazone	NC(=O)NN=CC1=CC=C(O1)N(=O)=O	Neg	PMID: 21898162	Pubmed	Collected from prior studies which focused on developing QSAR models for DILI
928	Nitrogen Mustard	CN(CCCl)CCCl	Pos	PMID: 22194678	Pubmed	Collected from prior studies which focused on developing QSAR models for DILI
929	N-Nitrosodiethylamine	CCN(CC)N=O	Pos	PMID: 21699217	Pubmed	Collected from prior studies which focused on developing QSAR models for DILI
930	Nolatrexed	CC1=CC=C2NC(N)=NC(=O)C2=C1SC1=CC=NC=C1	Pos	PMID: 21898162	Pubmed	Collected from prior studies which focused on developing QSAR models for DILI
931	Nomifensine	CN1CC(C2=CC=CC=C2)C2=C(C1)C(N)=CC=C2	Pos	PMID: 26948801	Pubmed	Collected from prior studies which focused on developing QSAR models for DILI
932	Norfloxacin	CCN1C=C(C(O)=O)C(=O)C2=C1C=C(N1CCNCC1)C(F)=C2	Pos	PMID: 20192250	Pubmed	Collected from prior studies which focused on developing QSAR models for DILI
933	Novobiocin	COC1C(OC(N)=O)C(O)C(OC2=C(C)C3=C(C=C2)C(=O)C(NC(=O)C2=CC(CC=C(C)C)=C(O)C=C2)=C(O)O3)OC1(C)C	Pos	PMID: 18524759	Pubmed	Collected from prior studies which focused on developing QSAR models for DILI
934	N-Phenylanthranilic Acid	OC(=O)C1=CC=CC=C1NC1=CC=CC=C1	Neg	PMID: 21699217	Pubmed	Collected from prior studies which focused on developing QSAR models for DILI
935	O-Bromophenol	OC1=CC=CC=C1Br	Pos	PMID: 20843939	Pubmed	Collected from prior studies which focused on developing QSAR models for DILI
936	O-Desmethylvenlafaxine	CN(C)CC(C1=CC=C(O)C=C1)C1(O)CCCCC1	Neg	PMID: 22194678	Pubmed	Collected from prior studies which focused on developing QSAR models for DILI
937	O-Dichlorobenzene	ClC1=CC=CC=C1Cl	Pos	PMID: 21898162	Pubmed	Collected from prior studies which focused on developing QSAR models for DILI
938	Olanzapine	CN1CCN(CC1)C1=NC2=C(NC3=C1C=C(C)S3)C=CC=C2	Pos	PMID: 20192250	Pubmed	Collected from prior studies which focused on developing QSAR models for DILI
939	Olmesartan Medoxomil	CCCC1=NC(=C(N1CC1=CC=C(C=C1)C1=CC=CC=C1C1=NNN=N1)C(=O)OCC1=C(C)OC(=O)O1)C(C)(C)O	Pos	PMID: 22194678	Pubmed	Collected from prior studies which focused on developing QSAR models for DILI
940	Opipramol	OCCN1CCN(CCCN2C3=CC=CC=C3C=CC3=CC=CC=C23)CC1	Pos	PMID: 21898162	Pubmed	Collected from prior studies which focused on developing QSAR models for DILI
941	Orciprenaline	CC(C)NCC(O)C1=CC(O)=CC(O)=C1	Neg	PMID: 26948801	Pubmed	Collected from prior studies which focused on developing QSAR models for DILI
942	Oseltamivir	CCOC(=O)C1=CC(OC(CC)CC)C(NC(C)=O)C(N)C1	Pos	PMID: 21898162	Pubmed	Collected from prior studies which focused on developing QSAR models for DILI
943	Oxacillin	CC1=C(C(=O)NC2C3SC(C)(C)C(N3C2=O)C(O)=O)C(=NO1)C1=CC=CC=C1	Pos	PMID: 21898162	Pubmed	Collected from prior studies which focused on developing QSAR models for DILI
944	Oxatomide	O=C1NC2=CC=CC=C2N1CCCN1CCN(CC1)C(C1=CC=CC=C1)C1=CC=CC=C1	Pos	PMID: 21898162	Pubmed	Collected from prior studies which focused on developing QSAR models for DILI
945	Oxcarbazepine	NC(=O)N1C2=CC=CC=C2CC(=O)C2=CC=CC=C12	Pos	PMID: 21898162	Pubmed	Collected from prior studies which focused on developing QSAR models for DILI
946	Oxiconazole	ClC1=CC(Cl)=C(CON=C(CN2C=CN=C2)C2=CC=C(Cl)C=C2Cl)C=C1	Neg	PMID: 20192250	Pubmed	Collected from prior studies which focused on developing QSAR models for DILI
947	Oxprenolol	CC(C)NCC(O)COC1=CC=CC=C1OCC=C	Neg	PMID: 21898162	Pubmed	Collected from prior studies which focused on developing QSAR models for DILI
948	Oxybendazole	CCCOC1=CC2=C(C=C1)N=C(NC(=O)OC)N2	Pos	PMID: 18524759	Pubmed	Collected from prior studies which focused on developing QSAR models for DILI
949	Oxyphencyclimine	CN1CCCN=C1COC(=O)C(O)(C1CCCCC1)C1=CC=CC=C1	Neg	PMID: 21898162	Pubmed	Collected from prior studies which focused on developing QSAR models for DILI
950	Oxyphenisatin	CC(=O)OC1=CC=C(C=C1)C1(C(=O)NC2=CC=CC=C12)C1=CC=C(OC(C)=O)C=C1	Pos	PMID: 26948801	Pubmed	Collected from prior studies which focused on developing QSAR models for DILI
951	P,P'-Diaminodiphenylmethane	NC1=CC=C(CC2=CC=C(N)C=C2)C=C1	Pos	PMID: 21898162	Pubmed	Collected from prior studies which focused on developing QSAR models for DILI
952	Pancuronium	CC(=O)OC1C(CC2C3CCC4CC(OC(C)=O)C(CC4(C)C3CCC12C)[N+]1(C)CCCCC1)[N+]1(C)CCCCC1	Neg	PMID: 26948801	Pubmed	Collected from prior studies which focused on developing QSAR models for DILI
953	Panobinostat	CC1=C(CCNCC2=CC=C(C=CC(=O)NO)C=C2)C2=C(N1)C=CC=C2	Neg	PMID: 23456678	Pubmed	Collected from prior studies which focused on developing QSAR models for DILI
954	Pantoprazole	COC1=CC=NC(CS(=O)C2=NC3=CC=C(OC(F)F)C=C3N2)=C1OC	Pos	PMID: 21898162	Pubmed	Collected from prior studies which focused on developing QSAR models for DILI
955	Pantothenic Acid	CC(C)(CO)C(O)C(=O)NCCC(O)=O	Neg	PMID: 23456678	Pubmed	Collected from prior studies which focused on developing QSAR models for DILI
956	Pap (Para-Aminophenol)	NC1=CC=C(O)C=C1	Neg	PMID: 20843939	Pubmed	Collected from prior studies which focused on developing QSAR models for DILI
957	Paramethadione	CCC1(C)OC(=O)N(C)C1=O	Pos	PMID: 21898162	Pubmed	Collected from prior studies which focused on developing QSAR models for DILI
958	Paraquat	C[N+]1=CC=C(C=C1)C1=CC=[N+](C)C=C1	Pos	PMID: 20843939	Pubmed	Collected from prior studies which focused on developing QSAR models for DILI
959	Paromomycin	NCC1OC(OC2C(CO)OC(OC3C(O)C(N)CC(N)C3OC3OC(CO)C(O)C(O)C3N)C2O)C(N)C(O)C1O	Neg	PMID: 26948801	Pubmed	Collected from prior studies which focused on developing QSAR models for DILI
960	Parsonsine	CC(C)C1CC(=O)OCC2CCN3CCC(OC(=O)C(O)(CC(=O)OC1C)C(C)C)C23	Pos	PMID: 25660478	Pubmed	Collected from prior studies which focused on developing QSAR models for DILI
961	P-Dimethylaminoazobenzene	CN(C)C1=CC=C(C=C1)N=NC1=CC=CC=C1	Pos	PMID: 21898162	Pubmed	Collected from prior studies which focused on developing QSAR models for DILI
962	Pefloxacin	CCN1C=C(C(O)=O)C(=O)C2=CC(F)=C(C=C12)N1CCN(C)CC1	Pos	PMID: 21898162	Pubmed	Collected from prior studies which focused on developing QSAR models for DILI
963	Pegaptanib	COCCOC(=O)NCCCCC(NC(=O)OCCOC)C(=O)NCCCCCOP(C)(O)=O	Neg	PMID: 21898162	Pubmed	Collected from prior studies which focused on developing QSAR models for DILI
964	Pegfilgrastim	COC1=C(CNC2CCCNC2C2=CC=CC=C2)C=C(C=C1)N(C)C	Neg	PMID: 26948801	Pubmed	Collected from prior studies which focused on developing QSAR models for DILI
965	Penbutolol	CC(C)(C)NCC(O)COC1=CC=CC=C1C1CCCC1	Neg	PMID: 23456678	Pubmed	Collected from prior studies which focused on developing QSAR models for DILI
966	Penfluridol	OC1(CCN(CCCC(C2=CC=C(F)C=C2)C2=CC=C(F)C=C2)CC1)C1=CC=C(Cl)C(=C1)C(F)(F)F	Neg	PMID: 21898162	Pubmed	Collected from prior studies which focused on developing QSAR models for DILI
967	Pentagastrin	CSCCC(NC(=O)C(CC1=CNC2=CC=CC=C12)NC(=O)CCNC(=O)OCC(C)C)C(=O)NC(CC(O)=O)C(=O)NC(CC1=CC=CC=C1)C(N)=O	Neg	PMID: 26948801	Pubmed	Collected from prior studies which focused on developing QSAR models for DILI
968	Pentazocine	CC1C2CC3=C(C=C(O)C=C3)C1(C)CCN2CC=C(C)C	Neg	PMID: 26948801	Pubmed	Collected from prior studies which focused on developing QSAR models for DILI
969	Pentosan Polysulfate Sodium	CC1=CC=C(C=C1C)S(O)(=O)=O	Pos	PMID: 21898162	Pubmed	Collected from prior studies which focused on developing QSAR models for DILI
970	Perazine	CN1CCN(CCCN2C3=CC=CC=C3SC3=CC=CC=C23)CC1	Pos	PMID: 21898162	Pubmed	Collected from prior studies which focused on developing QSAR models for DILI
971	Perflubron	FC(F)(F)C(F)(F)C(F)(F)C(F)(F)C(F)(F)C(F)(F)C(F)(F)C(F)(F)Br	Pos	PMID: 21898162	Pubmed	Collected from prior studies which focused on developing QSAR models for DILI
972	Pergolide	CCCN1CC(CSC)CC2C1CC1=CNC3=C1C2=CC=C3	Neg	PMID: 20192250	Pubmed	Collected from prior studies which focused on developing QSAR models for DILI
973	Periciazine	OC1CCN(CCCN2C3=CC=CC=C3SC3=CC=C(C=C23)C#N)CC1	Pos	PMID: 21898162	Pubmed	Collected from prior studies which focused on developing QSAR models for DILI
974	Permethrin	CC1(C)C(C=C(Cl)Cl)C1C(=O)OCC1=CC(OC2=CC=CC=C2)=CC=C1	Neg	PMID: 20192250	Pubmed	Collected from prior studies which focused on developing QSAR models for DILI
975	Phenacemide	NC(=O)NC(=O)CC1=CC=CC=C1	Pos	PMID: 21898162	Pubmed	Collected from prior studies which focused on developing QSAR models for DILI
976	Phenacetin	CCOC1=CC=C(NC(C)=O)C=C1	Pos	PMID: 18524759	Pubmed	Collected from prior studies which focused on developing QSAR models for DILI
977	Phenindione	O=C1C(C(=O)C2=CC=CC=C12)C1=CC=CC=C1	Pos	PMID: 21898162	Pubmed	Collected from prior studies which focused on developing QSAR models for DILI
978	Phenmetrazine	CC1NCCOC1C1=CC=CC=C1	Neg	PMID: 21898162	Pubmed	Collected from prior studies which focused on developing QSAR models for DILI
979	Phenol	OC1=CC=CC=C1	Pos	PMID: 21898162	Pubmed	Collected from prior studies which focused on developing QSAR models for DILI
980	Phenothiazine	N1C2=CC=CC=C2SC2=CC=CC=C12	Pos	PMID: 20843939	Pubmed	Collected from prior studies which focused on developing QSAR models for DILI
981	Phenoxybenzamine	CC(COC1=CC=CC=C1)N(CCCl)CC1=CC=CC=C1	Neg	PMID: 26948801	Pubmed	Collected from prior studies which focused on developing QSAR models for DILI
982	Phenyl Isothiocyanate	S=C=NC1=CC=CC=C1	Pos	PMID: 20843939	Pubmed	Collected from prior studies which focused on developing QSAR models for DILI
983	Phenylbutyrate	OC(=O)CCCC1=CC=CC=C1	Neg	PMID: 23456678	Pubmed	Collected from prior studies which focused on developing QSAR models for DILI
984	Picric Acid	OC1=C(C=C(C=C1N(=O)=O)N(=O)=O)N(=O)=O	Pos	PMID: 21898162	Pubmed	Collected from prior studies which focused on developing QSAR models for DILI
985	Pimavanserin	CC(C)COC1=CC=C(CNC(=O)N(CC2=CC=C(F)C=C2)C2CCN(C)CC2)C=C1	Neg	PMID: 23456678	Pubmed	Collected from prior studies which focused on developing QSAR models for DILI
986	Pimozide	FC1=CC=C(C=C1)C(CCCN1CCC(CC1)N1C(=O)NC2=CC=CC=C12)C1=CC=C(F)C=C1	Neg	PMID: 26948801	Pubmed	Collected from prior studies which focused on developing QSAR models for DILI
987	Pinaverium Bromide	COC1=C(OC)C=C(C[N+]2(CCOCCC3CCC4CC3C4(C)C)CCOCC2)C(Br)=C1	Neg	PMID: 22194678	Pubmed	Collected from prior studies which focused on developing QSAR models for DILI
988	Pindolol	CC(C)NCC(O)COC1=CC=CC2=C1C=CN2	Neg	PMID: 23456678	Pubmed	Collected from prior studies which focused on developing QSAR models for DILI
989	Pipecuronium Bromide	CC(=O)OC1C(CC2C3CCC4CC(OC(C)=O)C(CC4(C)C3CCC12C)N1CC[N+](C)(C)CC1)N1CC[N+](C)(C)CC1	Neg	PMID: 20192250	Pubmed	Collected from prior studies which focused on developing QSAR models for DILI
990	Piperonyl Butoxide	CCCCOCCOCCOCC1=CC2=C(OCO2)C=C1CCC	Neg	PMID: 24721472	Pubmed	Collected from prior studies which focused on developing QSAR models for DILI
991	Pipotiazine	CN(C)S(=O)(=O)C1=CC=C2SC3=CC=CC=C3N(CCCN3CCC(CCO)CC3)C2=C1	Pos	PMID: 21898162	Pubmed	Collected from prior studies which focused on developing QSAR models for DILI
992	Pirarubicin	COC1=CC=CC2=C1C(=O)C1=C(O)C3=C(CC(O)(CC3OC3CC(N)C(OC4CCCCO4)C(C)O3)C(=O)CO)C(O)=C1C2=O	Pos	PMID: 21898162	Pubmed	Collected from prior studies which focused on developing QSAR models for DILI
993	Pirazolac	OC(=O)CC1=NN(C=C1C1=CC=C(Cl)C=C1)C1=CC=C(F)C=C1	Pos	PMID: 21898162	Pubmed	Collected from prior studies which focused on developing QSAR models for DILI
994	Pirbuterol	CC(C)(C)NCC(O)C1=CC=C(O)C(CO)=N1	Neg	PMID: 20192250	Pubmed	Collected from prior studies which focused on developing QSAR models for DILI
995	Piretanide	NS(=O)(=O)C1=CC(=CC(N2CCCC2)=C1OC1=CC=CC=C1)C(O)=O	Pos	PMID: 21898162	Pubmed	Collected from prior studies which focused on developing QSAR models for DILI
996	Piribedil	C(N1CCN(CC1)C1=NC=CC=N1)C1=CC=C2OCOC2=C1	Pos	PMID: 21898162	Pubmed	Collected from prior studies which focused on developing QSAR models for DILI
997	Piritrexim	COC1=CC=C(OC)C(CC2=C(C)C3=C(N)N=C(N)N=C3N=C2)=C1	Pos	PMID: 21898162	Pubmed	Collected from prior studies which focused on developing QSAR models for DILI
998	Pirprofen	CC(C(O)=O)C1=CC(Cl)=C(C=C1)N1CC=CC1	Pos	PMID: 26948801	Pubmed	Collected from prior studies which focused on developing QSAR models for DILI
999	Pivmecillinam	CC(C)(C)C(=O)OCOC(=O)C1N2C(SC1(C)C)C(N=CN1CCCCCC1)C2=O	Pos	PMID: 24721472	Pubmed	Collected from prior studies which focused on developing QSAR models for DILI
1000	Plerixafor	C(N1CCCNCCNCCCNCC1)C1=CC=C(CN2CCCNCCNCCCNCC2)C=C1	Neg	PMID: 26948801	Pubmed	Collected from prior studies which focused on developing QSAR models for DILI
1001	Polythiazide	CN1C(CSCC(F)(F)F)NC2=CC(Cl)=C(C=C2S1(=O)=O)S(N)(=O)=O	Neg	PMID: 23456678	Pubmed	Collected from prior studies which focused on developing QSAR models for DILI
1002	Porfimer Sodium	CCC1=C2NC(C=C3N=C(C=C4N=C(C=C5NC(=C2)C(C)=C5C(C)O)C(C)=C4CCC(O)=O)C(CCC(O)=O)=C3C)=C1C	Pos	PMID: 22194678	Pubmed	Collected from prior studies which focused on developing QSAR models for DILI
1003	Posaconazole	CCC(C(C)O)N1N=CN(C1=O)C1=CC=C(C=C1)N1CCN(CC1)C1=CC=C(OCC2COC(CN3C=NC=N3)(C2)C2=CC=C(F)C=C2F)C=C1	Pos	PMID: 21898162	Pubmed	Collected from prior studies which focused on developing QSAR models for DILI
1004	Prajmaline	CCCN1C2CC34C(O)C2C(CC1C3N(C)C1=CC=CC=C41)C(CC)C=O	Pos	PMID: 21898162	Pubmed	Collected from prior studies which focused on developing QSAR models for DILI
1005	Pramipexole	CCCNC1CCC2=C(C1)SC(N)=N2	Neg	PMID: 23456678	Pubmed	Collected from prior studies which focused on developing QSAR models for DILI
1006	Pranlukast	O=C(NC1=CC=C2C(=O)C=C(OC2=C1)C1=NNN=N1)C1=CC=C(OCCCCC2=CC=CC=C2)C=C1	Pos	PMID: 21898162	Pubmed	Collected from prior studies which focused on developing QSAR models for DILI
1007	Pravastatin	CCC(C)C(=O)OC1CC(O)C=C2C=CC(C)C(CCC(O)CC(O)CC(O)=O)C12	Pos	PMID: 20192250	Pubmed	Collected from prior studies which focused on developing QSAR models for DILI
1008	Prazepam	ClC1=CC=C2N(CC3CC3)C(=O)CN=C(C3=CC=CC=C3)C2=C1	Neg	PMID: 20192250	Pubmed	Collected from prior studies which focused on developing QSAR models for DILI
1009	Prilocaine	CCCNC(C)C(=O)NC1=CC=CC=C1C	Neg	PMID: 23456678	Pubmed	Collected from prior studies which focused on developing QSAR models for DILI
1010	Procaine	CCN(CC)CCOC(=O)C1=CC=C(N)C=C1	Neg	PMID: 21898162	Pubmed	Collected from prior studies which focused on developing QSAR models for DILI
1011	Prochlorperazine	CN1CCN(CCCN2C3=CC=CC=C3SC3=CC=C(Cl)C=C23)CC1	Pos	PMID: 21898162	Pubmed	Collected from prior studies which focused on developing QSAR models for DILI
1012	Progabide	NC(=O)CCCNC(C1=CC=C(Cl)C=C1)=C1C=C(F)C=CC1=O	Pos	PMID: 21898162	Pubmed	Collected from prior studies which focused on developing QSAR models for DILI
1013	Proparacaine	CCCOC1=CC=C(C=C1N)C(=O)OCCN(CC)CC	Neg	PMID: 21898162	Pubmed	Collected from prior studies which focused on developing QSAR models for DILI
1014	Propiomazine	CCC(=O)C1=CC=C2SC3=CC=CC=C3N(CC(C)N(C)C)C2=C1	Neg	PMID: 21898162	Pubmed	Collected from prior studies which focused on developing QSAR models for DILI
1015	Propranolol	CC(C)NCC(O)COC1=CC=CC2=CC=CC=C12	Neg	PMID: 23456678	Pubmed	Collected from prior studies which focused on developing QSAR models for DILI
1016	Puromycin	COC1=CC=C(CC(N)C(=O)NC2C(CO)OC(C2O)N2C=NC3=C2N=CN=C3N(C)C)C=C1	Pos	PMID: 18524759	Pubmed	Collected from prior studies which focused on developing QSAR models for DILI
1017	Puromycin Aminonucleoside	CN(C)C1=C2N=CN(C3OC(CO)C(N)C3O)C2=NC=N1	Pos	PMID: 21699217	Pubmed	Collected from prior studies which focused on developing QSAR models for DILI
1018	Pyridine	C1=CC=NC=C1	Pos	PMID: 21898162	Pubmed	Collected from prior studies which focused on developing QSAR models for DILI
1019	Quetiapine	OCCOCCN1CCN(CC1)C1=NC2=CC=CC=C2SC2=CC=CC=C12	Pos	PMID: 23456678	Pubmed	Collected from prior studies which focused on developing QSAR models for DILI
1020	Quinacrine	CCN(CC)CCCC(C)NC1=C2C=C(OC)C=CC2=NC2=CC(Cl)=CC=C12	Pos	PMID: 21898162	Pubmed	Collected from prior studies which focused on developing QSAR models for DILI
1021	Quinethazone	CCC1NC(=O)C2=CC(=C(Cl)C=C2N1)S(N)(=O)=O	Pos	PMID: 21898162	Pubmed	Collected from prior studies which focused on developing QSAR models for DILI
1022	Rabeprazole	COCCCOC1=C(C)C(CS(=O)C2=NC3=CC=CC=C3N2)=NC=C1	Pos	PMID: 22194678	Pubmed	Collected from prior studies which focused on developing QSAR models for DILI
1023	Raltitrexed	CN(CC1=CC=C2NC(C)=NC(=O)C2=C1)C1=CC=C(S1)C(=O)NC(CCC(O)=O)C(O)=O	Pos	PMID: 21898162	Pubmed	Collected from prior studies which focused on developing QSAR models for DILI
1024	Ramelteon	CCC(=O)NCCC1CCC2=C1C1=C(OCC1)C=C2	Neg	PMID: 26948801	Pubmed	Collected from prior studies which focused on developing QSAR models for DILI
1025	Rapacuronium	CCC(=O)OC1C(CC2C3CCC4CC(OC(C)=O)C(CC4(C)C3CCC12C)N1CCCCC1)[N+]1(CC=C)CCCCC1	Neg	PMID: 21898162	Pubmed	Collected from prior studies which focused on developing QSAR models for DILI
1026	Rasagiline	C#CCNC1CCC2=CC=CC=C12	Neg	PMID: 23456678	Pubmed	Collected from prior studies which focused on developing QSAR models for DILI
1027	Regorafenib	CNC(=O)C1=NC=CC(OC2=CC(F)=C(NC(=O)NC3=CC=C(Cl)C(=C3)C(F)(F)F)C=C2)=C1	Pos	PMID: 23456678	Pubmed	Collected from prior studies which focused on developing QSAR models for DILI
1028	Rescinnamine	COC1C(CC2CN3CCC4=C(NC5=CC(OC)=CC=C45)C3CC2C1C(=O)OC)OC(=O)C=CC1=CC(OC)=C(OC)C(OC)=C1	Neg	PMID: 21898162	Pubmed	Collected from prior studies which focused on developing QSAR models for DILI
1029	Reserpine	COC1C(CC2CN3CCC4=C(NC5=C4C=CC(OC)=C5)C3CC2C1C(=O)OC)OC(=O)C1=CC(OC)=C(OC)C(OC)=C1	Neg	PMID: 23456678	Pubmed	Collected from prior studies which focused on developing QSAR models for DILI
1030	Resorcinol	OC1=CC(O)=CC=C1	Pos	PMID: 21898162	Pubmed	Collected from prior studies which focused on developing QSAR models for DILI
1031	Retapamulin	CC1CCC23CCC(=O)C2C1(C)C(CC(C)(C=C)C(O)C3C)OC(=O)CSC1CC2CCC(C1)N2C	Neg	PMID: 21898162	Pubmed	Collected from prior studies which focused on developing QSAR models for DILI
1032	Retinyl Palmitate	CCCCCCCCCCCCCCCC(=O)OCC=C(C)C=CC=C(C)C=CC1=C(C)CCCC1(C)C	Pos	PMID: 20843939	Pubmed	Collected from prior studies which focused on developing QSAR models for DILI
1033	Rifabutin	COC1C=COC2(C)OC3=C(C2=O)C2=C(C(O)=C3C)C(=O)C(NC(=O)C(C)=CC=CC(C)C(O)C(C)C(O)C(C)C(OC(C)=O)C1C)=C1NC3(CCN(CC(C)C)CC3)N=C21	Pos	PMID: 20192250	Pubmed	Collected from prior studies which focused on developing QSAR models for DILI
1034	Rifampin	COC1C=COC2(C)OC3=C(C)C(O)=C4C(O)=C(NC(=O)C(C)=CC=CC(C)C(O)C(C)C(O)C(C)C(OC(C)=O)C1C)C(=CNN1CCN(C)CC1)C(=O)C4=C3C2=O	Pos	PMID: 23456678	Pubmed	Collected from prior studies which focused on developing QSAR models for DILI
1035	Rifapentine	COC1C=COC2(C)OC3=C(C2=O)C2=C(C(O)=C3C)C(O)=C(NC(=O)C(C)=CC=CC(C)C(O)C(C)C(O)C(C)C(OC(C)=O)C1C)C(=CNN1CCN(CC1)C1CCCC1)C2=O	Pos	PMID: 21898162	Pubmed	Collected from prior studies which focused on developing QSAR models for DILI
1036	Rifaximin	COC1C=COC2(C)OC3=C(C2=O)C2=C(C(O)=C3C)C(O)=C(NC(=O)C(C)=CC=CC(C)C(O)C(C)C(O)C(C)C(OC(C)=O)C1C)C1=C2N=C2C=C(C)C=CN12	Neg	PMID: 23456678	Pubmed	Collected from prior studies which focused on developing QSAR models for DILI
1037	Riluzole	NC1=NC2=C(S1)C=C(OC(F)(F)F)C=C2	Pos	PMID: 26948801	Pubmed	Collected from prior studies which focused on developing QSAR models for DILI
1038	Rimantadine	CC(N)C12CC3CC(CC(C3)C1)C2	Neg	PMID: 23456678	Pubmed	Collected from prior studies which focused on developing QSAR models for DILI
1039	Riociguat	COC(=O)N(C)C1=C(N)N=C(N=C1N)C1=NN(CC2=CC=CC=C2F)C2=C1C=CC=N2	Neg	PMID: 23456678	Pubmed	Collected from prior studies which focused on developing QSAR models for DILI
1040	Risedronate	OC(CC1=CC=CN=C1)(P(O)(O)=O)P(O)(O)=O	Neg	PMID: 21898162	Pubmed	Collected from prior studies which focused on developing QSAR models for DILI
1041	Ritodrine	CC(NCCC1=CC=C(O)C=C1)C(O)C1=CC=C(O)C=C1	Pos	PMID: 20192250	Pubmed	Collected from prior studies which focused on developing QSAR models for DILI
1042	Ritonavir	CC(C)C(NC(=O)N(C)CC1=CSC(=N1)C(C)C)C(=O)NC(CC(O)C(CC1=CC=CC=C1)NC(=O)OCC1=CN=CS1)CC1=CC=CC=C1	Pos	PMID: 26948801	Pubmed	Collected from prior studies which focused on developing QSAR models for DILI
1043	Rivaroxaban	ClC1=CC=C(S1)C(=O)NCC1CN(C(=O)O1)C1=CC=C(C=C1)N1CCOCC1=O	Pos	PMID: 23456678	Pubmed	Collected from prior studies which focused on developing QSAR models for DILI
1044	Rizatriptan	CN(C)CCC1=CNC2=C1C=C(CN1C=NC=N1)C=C2	Neg	PMID: 26948801	Pubmed	Collected from prior studies which focused on developing QSAR models for DILI
1045	Rocuronium	CC(=O)OC1C(CC2C3CCC4CC(O)C(CC4(C)C3CCC12C)N1CCOCC1)[N+]1(CC=C)CCCC1	Neg	PMID: 26948801	Pubmed	Collected from prior studies which focused on developing QSAR models for DILI
1046	Rofecoxib	CS(=O)(=O)C1=CC=C(C=C1)C1=C(C(=O)OC1)C1=CC=CC=C1	Pos	PMID: 21898162	Pubmed	Collected from prior studies which focused on developing QSAR models for DILI
1047	Roflumilast	FC(F)OC1=CC=C(C=C1OCC1CC1)C(=O)NC1=C(Cl)C=NC=C1Cl	Neg	PMID: 23456678	Pubmed	Collected from prior studies which focused on developing QSAR models for DILI
1048	Ronnel	COP(=S)(OC)OC1=CC(Cl)=C(Cl)C=C1Cl	Pos	PMID: 21898162	Pubmed	Collected from prior studies which focused on developing QSAR models for DILI
1049	Ropivacaine	CCCN1CCCCC1C(=O)NC1=C(C)C=CC=C1C	Neg	PMID: 23456678	Pubmed	Collected from prior studies which focused on developing QSAR models for DILI
1050	Rosuvastatin	CC(C)C1=NC(=NC(C2=CC=C(F)C=C2)=C1C=CC(O)CC(O)CC(O)=O)N(C)S(C)(=O)=O	Pos	PMID: 23456678	Pubmed	Collected from prior studies which focused on developing QSAR models for DILI
1051	Rotigotine	CCCN(CCC1=CC=CS1)C1CCC2=C(O)C=CC=C2C1	Neg	PMID: 23456678	Pubmed	Collected from prior studies which focused on developing QSAR models for DILI
1052	Roxatidine	CC(=O)OCC(=O)NCCCOC1=CC=CC(CN2CCCCC2)=C1	Pos	PMID: 21898162	Pubmed	Collected from prior studies which focused on developing QSAR models for DILI
1053	Roxithromycin	CCC1OC(=O)C(C)C(OC2CC(C)(OC)C(O)C(C)O2)C(C)C(OC2OC(C)CC(C2O)N(C)C)C(C)(O)CC(C)C(=NOCOCCOC)C(C)C(O)C1(C)O	Pos	PMID: 21898162	Pubmed	Collected from prior studies which focused on developing QSAR models for DILI
1054	Saikosaponin B1	CC1OC(OC2C(O)C(CO)OC(OC3CCC4(C)C(CCC5(C)C4C=CC4=C6CC(C)(C)CCC6(CO)C(O)CC54C)C3(C)CO)C2O)C(O)C(O)C1O	Neg	PMID: 25660478	Pubmed	Collected from prior studies which focused on developing QSAR models for DILI
1055	Salmeterol	OCC1=C(O)C=CC(=C1)C(O)CNCCCCCCOCCCCC1=CC=CC=C1	Neg	PMID: 20192250	Pubmed	Collected from prior studies which focused on developing QSAR models for DILI
1056	Samarium Sm 153 Lexidronam	OP(O)(=O)CN(CCN(CP(O)(O)=O)CP(O)(O)=O)CP(O)(O)=O	Neg	PMID: 21898162	Pubmed	Collected from prior studies which focused on developing QSAR models for DILI
1057	Scopolamine	CN1C2CC(CC1C1OC21)OC(=O)C(CO)C1=CC=CC=C1	Neg	PMID: 26948801	Pubmed	Collected from prior studies which focused on developing QSAR models for DILI
1058	Selexipag	CC(C)N(CCCCOCC(=O)NS(C)(=O)=O)C1=NC(C2=CC=CC=C2)=C(N=C1)C1=CC=CC=C1	Neg	PMID: 23456678	Pubmed	Collected from prior studies which focused on developing QSAR models for DILI
1059	Seratrodast	CC1=C(C)C(=O)C(C(CCCCCC(O)=O)C2=CC=CC=C2)=C(C)C1=O	Pos	PMID: 21898162	Pubmed	Collected from prior studies which focused on developing QSAR models for DILI
1060	Sevoflurane	FCOC(C(F)(F)F)C(F)(F)F	Pos	PMID: 23456678	Pubmed	Collected from prior studies which focused on developing QSAR models for DILI
1061	Sibutramine	CC(C)CC(N(C)C)C1(CCC1)C1=CC=C(Cl)C=C1	Pos	PMID: 21898162	Pubmed	Collected from prior studies which focused on developing QSAR models for DILI
1062	Sildenafil	CCCC1=NN(C)C2=C1NC(=NC2=O)C1=CC(=CC=C1OCC)S(=O)(=O)N1CCN(C)CC1	Pos	PMID: 21898162	Pubmed	Collected from prior studies which focused on developing QSAR models for DILI
1063	Simvastatin	CCC(C)(C)C(=O)OC1CC(C)C=C2C=CC(C)C(CCC3CC(O)CC(=O)O3)C12	Pos	PMID: 23456678	Pubmed	Collected from prior studies which focused on developing QSAR models for DILI
1064	Sitaxsentan	CC1=NOC(NS(=O)(=O)C2=C(SC=C2)C(=O)CC2=CC3=C(OCO3)C=C2C)=C1Cl	Pos	PMID: 26948801	Pubmed	Collected from prior studies which focused on developing QSAR models for DILI
1065	Sodium Benzoate	OC(=O)C1=CC=CC=C1	Neg	PMID: 23456678	Pubmed	Collected from prior studies which focused on developing QSAR models for DILI
1066	Sorafenib	CNC(=O)C1=NC=CC(OC2=CC=C(NC(=O)NC3=CC(=C(Cl)C=C3)C(F)(F)F)C=C2)=C1	Pos	PMID: 23456678	Pubmed	Collected from prior studies which focused on developing QSAR models for DILI
1067	Stanozolol	CC1(O)CCC2C3CCC4CC5=C(CC4(C)C3CCC12C)C=NN5	Pos	PMID: 21898162	Pubmed	Collected from prior studies which focused on developing QSAR models for DILI
1068	Streptokinase	OC(=O)C1CC(CN1)C1CCCCC1	Pos	PMID: 21898162	Pubmed	Collected from prior studies which focused on developing QSAR models for DILI
1069	Stuntman	O=C1NNC(=O)C=C1	Pos	PMID: 18524759	Pubmed	Collected from prior studies which focused on developing QSAR models for DILI
1070	Styrene	C=CC1=CC=CC=C1	Pos	PMID: 21898162	Pubmed	Collected from prior studies which focused on developing QSAR models for DILI
1071	Succimer	OC(=O)C(S)C(S)C(O)=O	Pos	PMID: 21898162	Pubmed	Collected from prior studies which focused on developing QSAR models for DILI
1072	Sudoxicam	CN1C(C(=O)NC2=NC=CS2)=C(O)C2=CC=CC=C2S1(=O)=O	Pos	PMID: 20843939	Pubmed	Collected from prior studies which focused on developing QSAR models for DILI
1073	Sufentanil	CCC(=O)N(C1=CC=CC=C1)C1(COC)CCN(CCC2=CC=CS2)CC1	Neg	PMID: 23456678	Pubmed	Collected from prior studies which focused on developing QSAR models for DILI
1074	Sulfamethizole	CC1=NN=C(NS(=O)(=O)C2=CC=C(N)C=C2)S1	Pos	PMID: 20843939	Pubmed	Collected from prior studies which focused on developing QSAR models for DILI
1075	Sulfamethoxazole	CC1=CC(NS(=O)(=O)C2=CC=C(N)C=C2)=NO1	Pos	PMID: 23997115	Pubmed	Collected from prior studies which focused on developing QSAR models for DILI
1076	Sulfapyridine	NC1=CC=C(C=C1)S(=O)(=O)NC1=CC=CC=N1	Pos	PMID: 21898162	Pubmed	Collected from prior studies which focused on developing QSAR models for DILI
1077	Sulfisoxazole	CC1=NOC(NS(=O)(=O)C2=CC=C(N)C=C2)=C1C	Pos	PMID: 21898162	Pubmed	Collected from prior studies which focused on developing QSAR models for DILI
1078	Sulisobenzone	COC1=C(C=C(C(=O)C2=CC=CC=C2)C(O)=C1)S(O)(=O)=O	Neg	PMID: 23997115	Pubmed	Collected from prior studies which focused on developing QSAR models for DILI
1079	Suvorexant	CC1CCN(CCN1C(=O)C1=C(C=CC(C)=C1)N1N=CC=N1)C1=NC2=CC(Cl)=CC=C2O1	Neg	PMID: 23456678	Pubmed	Collected from prior studies which focused on developing QSAR models for DILI
1080	Tadenan	CCCCCCCCCCCCCCCCCCCCCCO	Neg	PMID: 22194678	Pubmed	Collected from prior studies which focused on developing QSAR models for DILI
1081	Talinolol	CC(C)(C)NCC(O)COC1=CC=C(NC(=O)NC2CCCCC2)C=C1	Pos	PMID: 21898162	Pubmed	Collected from prior studies which focused on developing QSAR models for DILI
1082	Tdf	CC(C)OC(=O)OCOP(=O)(COC(C)CN1C=NC2=C1N=CN=C2N)OCOC(=O)OC(C)C	Pos	PMID: 22194678	Pubmed	Collected from prior studies which focused on developing QSAR models for DILI
1083	Technetium Tc 99M Tetrofosmin	CCOCCP(CCOCC)CCP(CCOCC)CCOCC	Neg	PMID: 21898162	Pubmed	Collected from prior studies which focused on developing QSAR models for DILI
1084	Tegaserod	CCCCCN=C(N)NNC=C1C=NC2=CC=C(CO)C=C12	Neg	PMID: 23456678	Pubmed	Collected from prior studies which focused on developing QSAR models for DILI
1085	Telithromycin	CCC1OC(=O)C(C)C(=O)C(C)C(OC2OC(C)CC(C2O)N(C)C)C(C)(CC(C)C(=O)C(C)C2N(CCCCN3C=NC(=C3)C3=CN=CC=C3)C(=O)OC12C)OC	Pos	PMID: 23456678	Pubmed	Collected from prior studies which focused on developing QSAR models for DILI
1086	Temafloxacin	CC1CN(CCN1)C1=CC2=C(C=C1F)C(=O)C(=CN2C1=CC=C(F)C=C1F)C(O)=O	Pos	PMID: 20843939	Pubmed	Collected from prior studies which focused on developing QSAR models for DILI
1087	Temazepam	CN1C2=CC=C(Cl)C=C2C(=NC(O)C1=O)C1=CC=CC=C1	Neg	PMID: 23456678	Pubmed	Collected from prior studies which focused on developing QSAR models for DILI
1088	Tenidap	NC(=O)N1C(O)=C(C(=O)C2=CC=CS2)C2=CC(Cl)=CC=C12	Pos	PMID: 21898162	Pubmed	Collected from prior studies which focused on developing QSAR models for DILI
1089	Teniposide	COC1=CC(=CC(OC)=C1O)C1C2C(COC2=O)C(OC2OC(C)C(OC(O)C3=CC=CS3)C(O)C2O)C2=C1C=C1OCOC1=C2	Neg	PMID: 20192250	Pubmed	Collected from prior studies which focused on developing QSAR models for DILI
1090	Tenoxicam	CN1C(=C(O)NC2=CC=CC=N2)C(=O)C2=C(C=CS2)S1(=O)=O	Pos	PMID: 21898162	Pubmed	Collected from prior studies which focused on developing QSAR models for DILI
1091	Terconazole	CC(C)N1CCN(CC1)C1=CC=C(OCC2COC(CN3C=NC=N3)(O2)C2=CC=C(Cl)C=C2Cl)C=C1	Neg	PMID: 21898162	Pubmed	Collected from prior studies which focused on developing QSAR models for DILI
1092	Tertatolol	CC(C)(C)NCC(O)COC1=CC=CC2=C1SCCC2	Neg	PMID: 21898162	Pubmed	Collected from prior studies which focused on developing QSAR models for DILI
1093	Testolactone	CC12CCC3C(CCC4=CC(=O)C=CC34C)C1CCC(=O)O2	Neg	PMID: 21898162	Pubmed	Collected from prior studies which focused on developing QSAR models for DILI
1094	Testosterone Cypionate	CC12CCC3C(CCC4=CC(=O)CCC34C)C1CCC2OC(=O)CCC1CCCC1	Neg	PMID: 20192250	Pubmed	Collected from prior studies which focused on developing QSAR models for DILI
1095	Testosterone Enanthate	CCCCCCC(=O)OC1CCC2C3CCC4=CC(=O)CCC4(C)C3CCC12C	Neg	PMID: 20192250	Pubmed	Collected from prior studies which focused on developing QSAR models for DILI
1096	Testosterone Ketolaurate	CCCCCCCCCC(=O)CC(=O)OC1CCC2C3CCC4=CC(=O)CCC4(C)C3CCC12C	Neg	PMID: 20192250	Pubmed	Collected from prior studies which focused on developing QSAR models for DILI
1097	Testosterone Phenylacetate	CC12CCC3C(CCC4=CC(=O)CCC34C)C1CCC2OC(=O)CC1=CC=CC=C1	Neg	PMID: 20192250	Pubmed	Collected from prior studies which focused on developing QSAR models for DILI
1098	Tetrabenazine	COC1=CC2=C(C=C1OC)C1CC(=O)C(CC(C)C)CN1CC2	Neg	PMID: 23456678	Pubmed	Collected from prior studies which focused on developing QSAR models for DILI
1099	Tetracaine Hcl	CCCCNC1=CC=C(C=C1)C(=O)OCCN(C)C	Neg	PMID: 18524759	Pubmed	Collected from prior studies which focused on developing QSAR models for DILI
1100	Tetrahydrobiopterin	CC(O)C(O)C1CNC2=C(N1)C(=O)N=C(N)N2	Neg	PMID: 26948801	Pubmed	Collected from prior studies which focused on developing QSAR models for DILI
1101	Thiamine	CC1=C(CCO)SC=[N+]1CC1=CN=C(C)N=C1N	Neg	PMID: 23456678	Pubmed	Collected from prior studies which focused on developing QSAR models for DILI
1102	Thiethylperazine	CCSC1=CC=C2SC3=CC=CC=C3N(CCCN3CCN(C)CC3)C2=C1	Pos	PMID: 21898162	Pubmed	Collected from prior studies which focused on developing QSAR models for DILI
1103	Thioguanine	NC1=NC(=S)C2=C(N1)N=CN2	Pos	PMID: 23456678	Pubmed	Collected from prior studies which focused on developing QSAR models for DILI
1104	Thiopental	CCCC(C)C1(CC)C(=O)NC(=S)NC1=O	Pos	PMID: 21898162	Pubmed	Collected from prior studies which focused on developing QSAR models for DILI
1105	Thiophenol	SC1=CC=CC=C1	Pos	PMID: 21898162	Pubmed	Collected from prior studies which focused on developing QSAR models for DILI
1106	Thyroxine	NC(CC1=CC(I)=C(OC2=CC(I)=C(O)C(I)=C2)C(I)=C1)C(O)=O	Neg	PMID: 22194678	Pubmed	Collected from prior studies which focused on developing QSAR models for DILI
1107	Tiagabine	CC1=C(SC=C1)C(=CCCN1CCCC(C1)C(O)=O)C1=C(C)C=CS1	Neg	PMID: 23456678	Pubmed	Collected from prior studies which focused on developing QSAR models for DILI
1108	Tianeptine	CN1C2=CC=CC=C2C(NCCCCCCC(O)=O)C2=C(C=C(Cl)C=C2)S1(=O)=O	Pos	PMID: 18524759	Pubmed	Collected from prior studies which focused on developing QSAR models for DILI
1109	Tiaprofenic	CC(C(O)=O)C1=CC=C(S1)C(=O)C1=CC=CC=C1	Pos	PMID: 21898162	Pubmed	Collected from prior studies which focused on developing QSAR models for DILI
1110	Tibolone	CC1CC2=C(CCC(=O)C2)C2CCC3(C)C(CCC3(O)C#C)C12	Neg	PMID: 21898162	Pubmed	Collected from prior studies which focused on developing QSAR models for DILI
1111	Tigecycline	CN(C)C1C2CC3CC4=C(C=C(NC(=O)CNC(C)(C)C)C(O)=C4C(O)=C3C(=O)C2(O)C(=O)C(=C(N)O)C1=O)N(C)C	Pos	PMID: 21898162	Pubmed	Collected from prior studies which focused on developing QSAR models for DILI
1112	Tiotropium	C[N+]1(C)C2CC(CC1C1OC21)OC(=O)C(O)(C1=CC=CS1)C1=CC=CS1	Neg	PMID: 21898162	Pubmed	Collected from prior studies which focused on developing QSAR models for DILI
1113	Tocainide	CC(N)C(=O)NC1=C(C)C=CC=C1C	Neg	PMID: 20192250	Pubmed	Collected from prior studies which focused on developing QSAR models for DILI
1114	Tolazamide	CC1=CC=C(C=C1)S(=O)(=O)NC(=O)NN1CCCCCC1	Pos	PMID: 23456678	Pubmed	Collected from prior studies which focused on developing QSAR models for DILI
1115	Tolbutamide	CCCCNC(=O)NS(=O)(=O)C1=CC=C(C)C=C1	Pos	PMID: 23456678	Pubmed	Collected from prior studies which focused on developing QSAR models for DILI
1116	Tolmetin	CN1C(CC(O)=O)=CC=C1C(=O)C1=CC=C(C)C=C1	Pos	PMID: 18524759	Pubmed	Collected from prior studies which focused on developing QSAR models for DILI
1117	Tolrestat	COC1=C(C2=C(C=C1)C(=CC=C2)C(=S)N(C)CC(O)=O)C(F)(F)F	Pos	PMID: 26948801	Pubmed	Collected from prior studies which focused on developing QSAR models for DILI
1118	Toremifene	CN(C)CCOC1=CC=C(C=C1)C(=C(CCCl)C1=CC=CC=C1)C1=CC=CC=C1	Pos	PMID: 21898162	Pubmed	Collected from prior studies which focused on developing QSAR models for DILI
1119	Travoprost	CC(C)OC(=O)CCCC=CCC1C(O)CC(O)C1C=CC(O)COC1=CC=CC(=C1)C(F)(F)F	Neg	PMID: 21898162	Pubmed	Collected from prior studies which focused on developing QSAR models for DILI
1120	Tridihexethyl Chloride	CC[N+](CC)(CC)CCC(O)(C1CCCCC1)C1=CC=CC=C1	Neg	PMID: 21898162	Pubmed	Collected from prior studies which focused on developing QSAR models for DILI
1121	Triflupromazine	CN(C)CCCN1C2=CC=CC=C2SC2=CC=C(C=C12)C(F)(F)F	Pos	PMID: 21898162	Pubmed	Collected from prior studies which focused on developing QSAR models for DILI
1122	Trihexyphenidyl	OC(CCN1CCCCC1)(C1CCCCC1)C1=CC=CC=C1	Neg	PMID: 26948801	Pubmed	Collected from prior studies which focused on developing QSAR models for DILI
1123	Trimethobenzamide Hcl	COC1=CC(=CC(OC)=C1OC)C(=O)NCC1=CC=C(OCCN(C)C)C=C1	Pos	PMID: 20843939	Pubmed	Collected from prior studies which focused on developing QSAR models for DILI
1124	Trimethoprim	COC1=CC(CC2=CN=C(N)N=C2N)=CC(OC)=C1OC	Pos	PMID: 20843939	Pubmed	Collected from prior studies which focused on developing QSAR models for DILI
1125	Triprolidine	CC1=CC=C(C=C1)C(=CCN1CCCC1)C1=CC=CC=N1	Neg	PMID: 26948801	Pubmed	Collected from prior studies which focused on developing QSAR models for DILI
1126	Troleandomycin	COC1CC(OC2C(C)C(OC3OC(C)CC(C3OC(C)=O)N(C)C)C(C)CC3(CO3)C(=O)C(C)C(OC(C)=O)C(C)C(C)OC(=O)C2C)OC(C)C1OC(C)=O	Pos	PMID: 20843939	Pubmed	Collected from prior studies which focused on developing QSAR models for DILI
1127	Tropicamide	CCN(CC1=CC=NC=C1)C(=O)C(CO)C1=CC=CC=C1	Neg	PMID: 21898162	Pubmed	Collected from prior studies which focused on developing QSAR models for DILI
1128	Tropisetron	CN1C2CCC1CC(C2)OC(=O)C1=CNC2=CC=CC=C12	Pos	PMID: 21898162	Pubmed	Collected from prior studies which focused on developing QSAR models for DILI
1129	Trypan Blue	CC1=CC(=CC=C1NN=C1C(=O)C2=C(N)C=C(C=C2C=C1S(O)(=O)=O)S(O)(=O)=O)C1=CC=C(NN=C2C(=O)C3=C(N)C=C(C=C3C=C2S(O)(=O)=O)S(O)(=O)=O)C(C)=C1	Neg	PMID: 21898162	Pubmed	Collected from prior studies which focused on developing QSAR models for DILI
1130	Tubocurarine	COC1=CC2=C3C(CC4=CC=C(O)C(OC5=CC6=C(CCN(C)C6CC6=CC=C(OC3=C1O)C=C6)C=C5OC)=C4)[N+](C)(C)CC2	Neg	PMID: 21898162	Pubmed	Collected from prior studies which focused on developing QSAR models for DILI
1131	Tyropanoate Sodium	CCCC(=O)NC1=C(I)C=C(I)C(CC(CC)C(O)=O)=C1I	Neg	PMID: 21898162	Pubmed	Collected from prior studies which focused on developing QSAR models for DILI
1132	Undecylenic Acid	OC(=O)CCCCCCCCC=C	Neg	PMID: 24721472	Pubmed	Collected from prior studies which focused on developing QSAR models for DILI
1133	Unoprostone	CCCCCCCC(=O)CCC1C(O)CC(O)C1CC=CCCCC(O)=O	Neg	PMID: 21898162	Pubmed	Collected from prior studies which focused on developing QSAR models for DILI
1134	Uracil Mustard	ClCCN(CCCl)C1=CNC(=O)NC1=O	Pos	PMID: 20843939	Pubmed	Collected from prior studies which focused on developing QSAR models for DILI
1135	Valaciclovir	CC(C)C(N)C(=O)OCCOCN1C=NC2=C1N=C(N)NC2=O	Pos	PMID: 24721472	Pubmed	Collected from prior studies which focused on developing QSAR models for DILI
1136	Valrubicin	CCCCC(=O)OCC(=O)C1(O)CC(OC2CC(NC(=O)C(F)(F)F)C(O)C(C)O2)C2=C(O)C3=C(C(O)=C2C1)C(=O)C1=CC=CC(OC)=C1C3=O	Neg	PMID: 23456678	Pubmed	Collected from prior studies which focused on developing QSAR models for DILI
1137	Vardenafil	CCCC1=NC(C)=C2N1NC(=NC2=O)C1=CC(=CC=C1OCC)S(=O)(=O)N1CCN(CC)CC1	Pos	PMID: 21898162	Pubmed	Collected from prior studies which focused on developing QSAR models for DILI
1138	Vecuronium	CC(=O)OC1C(CC2C3CCC4CC(OC(C)=O)C(CC4(C)C3CCC12C)N1CCCCC1)[N+]1(C)CCCCC1	Neg	PMID: 26948801	Pubmed	Collected from prior studies which focused on developing QSAR models for DILI
1139	Venetoclax	CC1(C)CCC(CN2CCN(CC2)C2=CC=C(C(=O)NS(=O)(=O)C3=CC=C(NCC4CCOCC4)C(=C3)[N+]([O-])=O)C(OC3=CN=C4NC=CC4=C3)=C2)=C(C1)C1=CC=C(Cl)C=C1	Neg	PMID: 23456678	Pubmed	Collected from prior studies which focused on developing QSAR models for DILI
1140	Verteporfin	COC(=O)CCC1=C2NC(C=C3N=C(C=C4NC(=CC5=NC(=C2)C(CCC(O)=O)=C5C)C(C=C)=C4C)C2=CC=C(C(C(=O)OC)C32C)C(=O)OC)=C1C	Pos	PMID: 21898162	Pubmed	Collected from prior studies which focused on developing QSAR models for DILI
1141	Vesnarinone	COC1=CC=C(C=C1OC)C(=O)N1CCN(CC1)C1=CC=C2NC(=O)CCC2=C1	Pos	PMID: 21898162	Pubmed	Collected from prior studies which focused on developing QSAR models for DILI
1142	Vinorelbine	CCC1=CC2CN(C1)CC1=C(NC3=CC=CC=C13)C(C2)(C(=O)OC)C1=C(OC)C=C2N(C)C3C4(CCN5CC=CC(CC)(C45)C(OC(C)=O)C3(O)C(=O)OC)C2=C1	Neg	PMID: 20192250	Pubmed	Collected from prior studies which focused on developing QSAR models for DILI
1143	Vorapaxar	[H]C12CC3([H])CC([H])(CCC3([H])C([H])(C=CC3=CC=C(C=N3)C3=CC(F)=CC=C3)C1([H])C(C)OC2=O)NC(=O)OCC	Neg	PMID: 23456678	Pubmed	Collected from prior studies which focused on developing QSAR models for DILI
1144	Voriconazole	CC(C1=NC=NC=C1F)C(O)(CN1C=NC=N1)C1=C(F)C=C(F)C=C1	Pos	PMID: 23456678	Pubmed	Collected from prior studies which focused on developing QSAR models for DILI
1145	Wy-14643	CC1=CC=CC(NC2=CC(Cl)=NC(SCC(O)=O)=N2)=C1C	Pos	PMID: 21699217	Pubmed	Collected from prior studies which focused on developing QSAR models for DILI
1146	Xanomeline	CCCCCCOC1=NSN=C1C1=CCCN(C)C1	Pos	PMID: 21898162	Pubmed	Collected from prior studies which focused on developing QSAR models for DILI
1147	Xylose	OC1COC(O)C(O)C1O	Neg	PMID: 21898162	Pubmed	Collected from prior studies which focused on developing QSAR models for DILI
1148	Zanamivir	CC(=O)NC1C(C=C(OC1C(O)C(O)CO)C(O)=O)N=C(N)N	Neg	PMID: 21898162	Pubmed	Collected from prior studies which focused on developing QSAR models for DILI
1149	Ziprasidone	ClC1=CC2=C(CC(=O)N2)C=C1CCN1CCN(CC1)C1=NSC2=CC=CC=C12	Pos	PMID: 21898162	Pubmed	Collected from prior studies which focused on developing QSAR models for DILI
1150	Zofenopril	CC(CSC(=O)C1=CC=CC=C1)C(=O)N1CC(CC1C(O)=O)SC1=CC=CC=C1	Pos	PMID: 21898162	Pubmed	Collected from prior studies which focused on developing QSAR models for DILI
1151	Zolpidem	CN(C)C(=O)CC1=C(N=C2C=CC(C)=CN12)C1=CC=C(C)C=C1	Neg	PMID: 23456678	Pubmed	Collected from prior studies which focused on developing QSAR models for DILI
1152	Zonisamide	NS(=O)(=O)CC1=NOC2=CC=CC=C12	Pos	PMID: 21898162	Pubmed	Collected from prior studies which focused on developing QSAR models for DILI
1153	Acetaminophen	CC(=O)NC1=CC=C(O)C=C1	Pos	PMID: 23486446	Pubmed	Collected from prior studies which focused on developing QSAR models for DILI
1154	Chlorpheniramine	CN(C)CCC(C1=CC=C(Cl)C=C1)C1=CC=CC=N1	Neg	PMID: 23486446	Pubmed	Collected from prior studies which focused on developing QSAR models for DILI
1155	Dopamine	NCCC1=CC=C(O)C(O)=C1	Neg	PMID: 23486446	Pubmed	Collected from prior studies which focused on developing QSAR models for DILI
1156	Allopurinol	O=C1N=CN=C2NNC=C12	Pos	PMID: 23486446	Pubmed	Collected from prior studies which focused on developing QSAR models for DILI
1157	Aminohippurate	NC1=CC=C(C=C1)C(=O)NCC(O)=O	Neg	PMID: 23486446	Pubmed	Collected from prior studies which focused on developing QSAR models for DILI
1158	Diflunisal	OC(=O)C1=CC(=CC=C1O)C1=CC=C(F)C=C1F	Pos	PMID: 23486446	Pubmed	Collected from prior studies which focused on developing QSAR models for DILI
1159	Fenoprofen	CC(C(O)=O)C1=CC=CC(OC2=CC=CC=C2)=C1	Pos	PMID: 23486446	Pubmed	Collected from prior studies which focused on developing QSAR models for DILI
1160	Imatinib	CN1CCN(CC2=CC=C(C=C2)C(=O)NC2=CC=C(C)C(NC3=NC=CC(=N3)C3=CC=CN=C3)=C2)CC1	Pos	PMID: 23486446	Pubmed	Collected from prior studies which focused on developing QSAR models for DILI
1161	Labetalol	CC(CCC1=CC=CC=C1)NCC(O)C1=CC=C(O)C(=C1)C(N)=O	Pos	PMID: 23486446	Pubmed	Collected from prior studies which focused on developing QSAR models for DILI
1162	Mefenamic Acid	CC1=CC=CC(NC2=CC=CC=C2C(O)=O)=C1C	Pos	PMID: 23486446	Pubmed	Collected from prior studies which focused on developing QSAR models for DILI
1163	Perhexiline	C(C(C1CCCCC1)C1CCCCC1)C1CCCCN1	Pos	PMID: 23486446	Pubmed	Collected from prior studies which focused on developing QSAR models for DILI
1164	Tamoxifen	CCC(=C(C1=CC=CC=C1)C1=CC=C(OCCN(C)C)C=C1)C1=CC=CC=C1	Pos	PMID: 23486446	Pubmed	Collected from prior studies which focused on developing QSAR models for DILI
1165	Tizanidine	ClC1=C(NC2=NCCN2)C2=NSN=C2C=C1	Pos	PMID: 23486446	Pubmed	Collected from prior studies which focused on developing QSAR models for DILI
1166	Troglitazone	CC1=C(C)C2=C(CCC(C)(COC3=CC=C(CC4SC(=O)NC4=O)C=C3)O2)C(C)=C1O	Pos	PMID: 23486446	Pubmed	Collected from prior studies which focused on developing QSAR models for DILI
1167	Vinblastine	CCC1(O)CC2CN(C1)CCC1=C(NC3=CC=CC=C13)C(C2)(C(=O)OC)C1=CC2=C(C=C1OC)N(C)C1C22CCN3CC=CC(CC)(C23)C(OC(C)=O)C1(O)C(=O)OC	Neg	PMID: 23486446	Pubmed	Collected from prior studies which focused on developing QSAR models for DILI
1168	Itraconazole	CCC(C)N1N=CN(C1=O)C1=CC=C(C=C1)N1CCN(CC1)C1=CC=C(OCC2COC(CN3C=NC=N3)(O2)C2=CC=C(Cl)C=C2Cl)C=C1	Pos	PMID: 23486446	Pubmed	Collected from prior studies which focused on developing QSAR models for DILI
1169	Raloxifene	OC1=CC=C(C=C1)C1=C(C(=O)C2=CC=C(OCCN3CCCCC3)C=C2)C2=CC=C(O)C=C2S1	Neg	PMID: 23486446	Pubmed	Collected from prior studies which focused on developing QSAR models for DILI
1170	Mifepristone	CC#CC1(O)CCC2C3CCC4=CC(=O)CCC4=C3C(CC12C)C1=CC=C(C=C1)N(C)C	Neg	PMID: 23486446	Pubmed	Collected from prior studies which focused on developing QSAR models for DILI
1171	Clomipramine	CN(C)CCCN1C2=CC=CC=C2CCC2=CC=C(Cl)C=C12	Pos	PMID: 23486446	Pubmed	Collected from prior studies which focused on developing QSAR models for DILI
1172	Clarithromycin	CCC1OC(=O)C(C)C(OC2CC(C)(OC)C(O)C(C)O2)C(C)C(OC2OC(C)CC(C2O)N(C)C)C(C)(CC(C)C(=O)C(C)C(O)C1(C)O)OC	Pos	PMID: 23486446	Pubmed	Collected from prior studies which focused on developing QSAR models for DILI
1173	Testosterone	CC12CCC3C(CCC4=CC(=O)CCC34C)C1CCC2O	Pos	PMID: 23486446	Pubmed	Collected from prior studies which focused on developing QSAR models for DILI
1174	Etodolac	CCC1=C2NC3=C(CCOC3(CC)CC(O)=O)C2=CC=C1	Pos	PMID: 23486446	Pubmed	Collected from prior studies which focused on developing QSAR models for DILI
1175	Pemoline	NC1=NC(=O)C(O1)C1=CC=CC=C1	Pos	PMID: 23486446	Pubmed	Collected from prior studies which focused on developing QSAR models for DILI
1176	Atorvastatin	CC(C)C1=C(C(=O)NC2=CC=CC=C2)C(=C(N1CCC(O)CC(O)CC(O)=O)C1=CC=C(F)C=C1)C1=CC=CC=C1	Pos	PMID: 23486446	Pubmed	Collected from prior studies which focused on developing QSAR models for DILI
1177	Digoxin	CC1OC(CC(O)C1O)OC1C(O)CC(OC2C(O)CC(OC3CCC4(C)C(CCC5C4CC(O)C4(C)C(CCC54O)C4=CC(=O)OC4)C3)OC2C)OC1C	Neg	PMID: 23486446	Pubmed	Collected from prior studies which focused on developing QSAR models for DILI
1178	Dextrose	OCC1OC(O)C(O)C(O)C1O	Neg	PMID: 23486446	Pubmed	Collected from prior studies which focused on developing QSAR models for DILI
1179	Trientine Hydrochloride	NCCNCCNCCN	Neg	PMID: 23486446	Pubmed	Collected from prior studies which focused on developing QSAR models for DILI
1180	Exemestane	CC12CCC3C(CC(=C)C4=CC(=O)C=CC34C)C1CCC2=O	Pos	PMID: 23486446	Pubmed	Collected from prior studies which focused on developing QSAR models for DILI
1181	Gefitinib	COC1=CC2=NC=NC(NC3=CC=C(F)C(Cl)=C3)=C2C=C1OCCCN1CCOCC1	Pos	PMID: 23486446	Pubmed	Collected from prior studies which focused on developing QSAR models for DILI
1182	Ioversol	OCCN(C(=O)CO)C1=C(I)C(C(=O)NCC(O)CO)=C(I)C(C(=O)NCC(O)CO)=C1I	Neg	PMID: 23486446	Pubmed	Collected from prior studies which focused on developing QSAR models for DILI
1183	Gamma Hydroxybutyric Acid	OCCCC(O)=O	Neg	PMID: 23486446	Pubmed	Collected from prior studies which focused on developing QSAR models for DILI
1184	Acetazolamide	CC(=O)NC1=NN=C(S1)S(N)(=O)=O	Pos	PMID: 23486446	Pubmed	Collected from prior studies which focused on developing QSAR models for DILI
1185	Albendazole	CCCSC1=CC=C2N=C(NC(=O)OC)NC2=C1	Pos	PMID: 23486446	Pubmed	Collected from prior studies which focused on developing QSAR models for DILI
1186	Benoxaprofen	CC(C(O)=O)C1=CC=C2OC(=NC2=C1)C1=CC=C(Cl)C=C1	Pos	PMID: 23486446	Pubmed	Collected from prior studies which focused on developing QSAR models for DILI
1187	Trospium	OC(C(=O)OC1CC2CCC(C1)[N+]21CCCC1)(C1=CC=CC=C1)C1=CC=CC=C1	Neg	PMID: 23486446	Pubmed	Collected from prior studies which focused on developing QSAR models for DILI
1188	Doxapram	CCN1CC(CCN2CCOCC2)C(C1=O)(C1=CC=CC=C1)C1=CC=CC=C1	Neg	PMID: 23486446	Pubmed	Collected from prior studies which focused on developing QSAR models for DILI
1189	Fesoterodine Fumarate	CC(C)N(CCC(C1=CC=CC=C1)C1=CC(CO)=CC=C1OC(=O)C(C)C)C(C)C	Neg	PMID: 23486446	Pubmed	Collected from prior studies which focused on developing QSAR models for DILI
1190	Primaquine	COC1=CC2=CC=CN=C2C(NC(C)CCCN)=C1	Neg	PMID: 23486446	Pubmed	Collected from prior studies which focused on developing QSAR models for DILI
1191	Zileuton	CC(N(O)C(N)=O)C1=CC2=CC=CC=C2S1	Pos	PMID: 23486446	Pubmed	Collected from prior studies which focused on developing QSAR models for DILI
1192	Etravirine	CC1=CC(=CC(C)=C1OC1=NC(NC2=CC=C(C=C2)C#N)=NC(N)=C1Br)C#N	Pos	PMID: 23486446	Pubmed	Collected from prior studies which focused on developing QSAR models for DILI
1193	Oxyphenisatine	OC1=CC=C(C=C1)C1(C(=O)NC2=CC=CC=C12)C1=CC=C(O)C=C1	Pos	PMID: 23486446	Pubmed	Collected from prior studies which focused on developing QSAR models for DILI
1194	Meperidine	CCOC(=O)C1(CCN(C)CC1)C1=CC=CC=C1	Neg	PMID: 23486446	Pubmed	Collected from prior studies which focused on developing QSAR models for DILI
1195	Doxylamine	CN(C)CCOC(C)(C1=CC=CC=C1)C1=CC=CC=N1	Neg	PMID: 23486446	Pubmed	Collected from prior studies which focused on developing QSAR models for DILI
1196	Propantheline	CC(C)[N+](C)(CCOC(=O)C1C2=CC=CC=C2OC2=CC=CC=C12)C(C)C	Neg	PMID: 23486446	Pubmed	Collected from prior studies which focused on developing QSAR models for DILI
1197	Diatrizoate	CC(=O)NC1=C(I)C(C(O)=O)=C(I)C(NC(C)=O)=C1I	Neg	PMID: 23486446	Pubmed	Collected from prior studies which focused on developing QSAR models for DILI
1198	Phytonadione	CC(C)CCCC(C)CCCC(C)CCCC(C)=CCC1=C(C)C(=O)C2=CC=CC=C2C1=O	Neg	PMID: 23486446	Pubmed	Collected from prior studies which focused on developing QSAR models for DILI
1199	[3-(2-Chloro-10H-Phenothiazin-10-Yl)Propyl]Dimethylamine	CN(C)CCCN1C2=CC=CC=C2SC2=CC=C(Cl)C=C12	Pos	PMID: 26437739	Pubmed	Collected from prior studies which focused on developing QSAR models for DILI
1200	5-({4-[(1-Methylcyclohexyl)Methoxy]Phenyl}Methyl)-1,3-Thiazolidine-2,4-Dione	CC1(COC2=CC=C(CC3SC(=O)NC3=O)C=C2)CCCCC1	Pos	PMID: 26437739	Pubmed	Collected from prior studies which focused on developing QSAR models for DILI
1201	N-Cyano-N''-Methyl-N'-(2-{[(5-Methyl-1H-Imidazol-4-Yl)Methyl]Sulfanyl}Ethyl)Guanidine	CN=C(NCCSCC1=C(C)NC=N1)NC#N	Pos	PMID: 26437739	Pubmed	Collected from prior studies which focused on developing QSAR models for DILI
1202	2-[4-(2,2-Dichlorocyclopropyl)Phenoxy]-2-Methylpropanoic Acid	CC(C)(OC1=CC=C(C=C1)C1CC1(Cl)Cl)C(O)=O	Pos	PMID: 26437739	Pubmed	Collected from prior studies which focused on developing QSAR models for DILI
1203	4-Amino-5-Chloro-N-{1-[3-(4-Fluorophenoxy)Propyl]-3-Methoxypiperidin-4-Yl}-2-Methoxybenzamide	COC1CN(CCCOC2=CC=C(F)C=C2)CCC1NC(=O)C1=CC(Cl)=C(N)C=C1OC	Neg	PMID: 26437739	Pubmed	Collected from prior studies which focused on developing QSAR models for DILI
1204	2-[Bis(2-Chloroethyl)Amino]-1,3,2Λ⁵-Oxazaphosphinan-2-One	ClCCN(CCCl)P1(=O)NCCCO1	Pos	PMID: 26437739	Pubmed	Collected from prior studies which focused on developing QSAR models for DILI
1205	N-(5-Aminopentyl)-N-Hydroxy-N'-[5-(N-Hydroxy-3-{[5-(N-Hydroxyacetamido)Pentyl]Carbamoyl}Propanamido)Pentyl]Butanediamide	CC(=O)N(O)CCCCCNC(=O)CCC(=O)N(O)CCCCCNC(=O)CCC(=O)N(O)CCCCCN	Neg	PMID: 26437739	Pubmed	Collected from prior studies which focused on developing QSAR models for DILI
1206	4-[Bis(Propan-2-Yl)Amino]-2-Phenyl-2-(Pyridin-2-Yl)Butanamide	CC(C)N(CCC(C(N)=O)(C1=CC=CC=C1)C1=CC=CC=N1)C(C)C	Pos	PMID: 26437739	Pubmed	Collected from prior studies which focused on developing QSAR models for DILI
1207	5-(1-Hydroxy-2-{[1-(4-Hydroxyphenyl)Propan-2-Yl]Amino}Ethyl)Benzene-1,3-Diol	CC(CC1=CC=C(O)C=C1)NCC(O)C1=CC(O)=CC(O)=C1	Pos	PMID: 26437739	Pubmed	Collected from prior studies which focused on developing QSAR models for DILI
1208	5-Fluoro-1,2,3,4-Tetrahydropyrimidine-2,4-Dione	FC1=CNC(=O)NC1=O	Pos	PMID: 26437739	Pubmed	Collected from prior studies which focused on developing QSAR models for DILI
1209	1-{[2-(Diethylamino)Ethyl]Amino}-4-(Hydroxymethyl)-9H-Thioxanthen-9-One	CCN(CC)CCNC1=C2C(=O)C3=CC=CC=C3SC2=C(CO)C=C1	Pos	PMID: 26437739	Pubmed	Collected from prior studies which focused on developing QSAR models for DILI
1210	(3-{2-Azatricyclo[9.4.0.0³,⁸]Pentadeca-1(15),3,5,7,11,13-Hexaen-2-Yl}Propyl)Dimethylamine	CN(C)CCCN1C2=CC=CC=C2CCC2=CC=CC=C12	Pos	PMID: 26437739	Pubmed	Collected from prior studies which focused on developing QSAR models for DILI
1211	1-(2,6-Dimethylphenoxy)Propan-2-Amine	CC(N)COC1=C(C)C=CC=C1C	Pos	PMID: 26437739	Pubmed	Collected from prior studies which focused on developing QSAR models for DILI
1212	5-Methyl-2,5-Diazatetracyclo[13.4.0.0²,⁷.0⁸,¹³]Nonadeca-1(19),8,10,12,15,17-Hexaene	CN1CCN2C(C1)C1=CC=CC=C1CC1=CC=CC=C21	Pos	PMID: 26437739	Pubmed	Collected from prior studies which focused on developing QSAR models for DILI
1213	1-[2-(2,4-Dichlorophenyl)-2-[(2,4-Dichlorophenyl)Methoxy]Ethyl]-1H-Imidazole	ClC1=CC=C(COC(CN2C=CN=C2)C2=CC=C(Cl)C=C2Cl)C(Cl)=C1	Neg	PMID: 26437739	Pubmed	Collected from prior studies which focused on developing QSAR models for DILI
1214	3-Methyl 5-(2-Methylpropyl) 2,6-Dimethyl-4-(2-Nitrophenyl)-1,4-Dihydropyridine-3,5-Dicarboxylate	COC(=O)C1=C(C)NC(C)=C(C1C1=CC=CC=C1[N+]([O-])=O)C(=O)OCC(C)C	Neg	PMID: 26437739	Pubmed	Collected from prior studies which focused on developing QSAR models for DILI
1215	Methyl(3-{Tricyclo[9.4.0.0³,⁸]Pentadeca-1(15),3,5,7,11,13-Hexaen-2-Ylidene}Propyl)Amine	CNCCC=C1C2=CC=CC=C2CCC2=CC=CC=C12	Pos	PMID: 26437739	Pubmed	Collected from prior studies which focused on developing QSAR models for DILI
1216	4-[(2-Methylhydrazin-1-Yl)Methyl]-N-(Propan-2-Yl)Benzamide	CNNCC1=CC=C(C=C1)C(=O)NC(C)C	Pos	PMID: 26437739	Pubmed	Collected from prior studies which focused on developing QSAR models for DILI
1217	Dimethyl[1-(10H-Phenothiazin-10-Yl)Propan-2-Yl]Amine	CC(CN1C2=CC=CC=C2SC2=CC=CC=C12)N(C)C	Neg	PMID: 26437739	Pubmed	Collected from prior studies which focused on developing QSAR models for DILI
1218	1-(2-{[(4-Chlorophenyl)Methyl]Sulfanyl}-2-(2,4-Dichlorophenyl)Ethyl)-1H-Imidazole	ClC1=CC=C(CSC(CN2C=CN=C2)C2=CC=C(Cl)C=C2Cl)C=C1	Neg	PMID: 26437739	Pubmed	Collected from prior studies which focused on developing QSAR models for DILI
1219	10-[3-(4-Methylpiperazin-1-Yl)Propyl]-2-(Trifluoromethyl)-10H-Phenothiazine	CN1CCN(CCCN2C3=CC=CC=C3SC3=CC=C(C=C23)C(F)(F)F)CC1	Pos	PMID: 26437739	Pubmed	Collected from prior studies which focused on developing QSAR models for DILI
1220	Trimethyl-1,3-Oxazolidine-2,4-Dione	CN1C(=O)OC(C)(C)C1=O	Pos	PMID: 26437739	Pubmed	Collected from prior studies which focused on developing QSAR models for DILI
1221	3-{[(4,5-Dihydro-1H-Imidazol-2-Yl)Methyl](4-Methylphenyl)Amino}Phenol	CC1=CC=C(C=C1)N(CC1=NCCN1)C1=CC=CC(O)=C1	Neg	PMID: 26437739	Pubmed	Collected from prior studies which focused on developing QSAR models for DILI
1222	7-Hydroxy-11A-Methyl-1H,2H,3H,3Ah,3Bh,4H,5H,9Bh,10H,11H,11Ah-Cyclopenta[A]Phenanthren-1-One	CC12CCC3C(CCC4=CC(O)=CC=C34)C1CCC2=O	Pos	PMID: 26437739	Pubmed	Collected from prior studies which focused on developing QSAR models for DILI
1223	1-Acetyl-9A,11A-Dimethyl-1H,2H,3H,3Ah,3Bh,4H,5H,7H,8H,9H,9Ah,9Bh,10H,11H,11Ah-Cyclopenta[A]Phenanthren-7-One	CC(=O)C1CCC2C3CCC4=CC(=O)CCC4(C)C3CCC12C	Pos	PMID: 26437739	Pubmed	Collected from prior studies which focused on developing QSAR models for DILI
1224	4-(2-Ethyl-1-Benzofuran-3-Carbonyl)-2,6-Diiodophenol	CCC1=C(C(=O)C2=CC(I)=C(O)C(I)=C2)C2=CC=CC=C2O1	Pos	PMID: 26437739	Pubmed	Collected from prior studies which focused on developing QSAR models for DILI
1225	4-Bromophenol	OC1=CC=C(Br)C=C1	Pos	PMID: 26437739	Pubmed	Collected from prior studies which focused on developing QSAR models for DILI
1226	Bromobenzene	BrC1=CC=CC=C1	Pos	PMID: 26437739	Pubmed	Collected from prior studies which focused on developing QSAR models for DILI
1227	N-{7-Benzyl-2-Hydroxy-4-Methyl-5,8-Dioxo-3-Oxa-6,9-Diazatricyclo[7.3.0.0²,⁶]Dodecan-4-Yl}-6-Methyl-6,11-Diazatetracyclo[7.6.1.0²,⁷.0¹²,¹⁶]Hexadeca-1(16),2,9,12,14-Pentaene-4-Carboxamide	CN1CC(C=C2C1CC1=CNC3=CC=CC2=C13)C(=O)NC1(C)OC2(O)C3CCCN3C(=O)C(CC3=CC=CC=C3)N2C1=O	Neg	PMID: 26437739	Pubmed	Collected from prior studies which focused on developing QSAR models for DILI
1228	5-Ethyl-1-Methyl-5-Phenyl-1,3-Diazinane-2,4,6-Trione	CCC1(C(=O)NC(=O)N(C)C1=O)C1=CC=CC=C1	Pos	PMID: 26437739	Pubmed	Collected from prior studies which focused on developing QSAR models for DILI
1229	{5-Ethenyl-1-Azabicyclo[2.2.2]Octan-2-Yl}(6-Methoxyquinolin-4-Yl)Methanol	COC1=CC2=C(C=CN=C2C=C1)C(O)C1CC2CCN1CC2C=C	Pos	PMID: 26437739	Pubmed	Collected from prior studies which focused on developing QSAR models for DILI
1230	7-(Acetyloxy)-1-Ethynyl-11A-Methyl-1H,2H,3H,3Ah,3Bh,4H,5H,7H,8H,9H,9Ah,9Bh,10H,11H,11Ah-Cyclopenta[A]Phenanthren-1-Yl Acetate	CC(=O)OC1CCC2C3CCC4(C)C(CCC4(OC(C)=O)C#C)C3CCC2=C1	Pos	PMID: 26437739	Pubmed	Collected from prior studies which focused on developing QSAR models for DILI
1231	11A-Ethyl-1-Ethynyl-1-Hydroxy-1H,2H,3H,3Ah,3Bh,4H,5H,7H,8H,9H,9Ah,9Bh,10H,11H,11Ah-Cyclopenta[A]Phenanthren-7-One	CCC12CCC3C(CCC4=CC(=O)CCC34)C1CCC2(O)C#C	Neg	PMID: 26437739	Pubmed	Collected from prior studies which focused on developing QSAR models for DILI
1232	6-{3-[(2-Carboxy-4-Oxo-4H-Chromen-5-Yl)Oxy]-2-Hydroxypropoxy}-4-Oxo-4H-Chromene-2-Carboxylic Acid	OC(COC1=CC=C2OC(=CC(=O)C2=C1)C(O)=O)COC1=C2C(=O)C=C(OC2=CC=C1)C(O)=O	Neg	PMID: 26437739	Pubmed	Collected from prior studies which focused on developing QSAR models for DILI
1233	N-{2-Chloro-1-[3,4,5-Trihydroxy-6-(Methylsulfanyl)Oxan-2-Yl]Propyl}-1-Methyl-4-Propylpyrrolidine-2-Carboxamide	CCCC1CC(N(C)C1)C(=O)NC(C(C)Cl)C1OC(SC)C(O)C(O)C1O	Pos	PMID: 26437739	Pubmed	Collected from prior studies which focused on developing QSAR models for DILI
1234	{[5-(6-Amino-2-Fluoro-9H-Purin-9-Yl)-3,4-Dihydroxyoxolan-2-Yl]Methoxy}Phosphonic Acid	NC1=C2N=CN(C3OC(COP(O)(O)=O)C(O)C3O)C2=NC(F)=N1	Neg	PMID: 26437739	Pubmed	Collected from prior studies which focused on developing QSAR models for DILI
1235	10-[(4-Amino-5-Hydroxy-6-Methyloxan-2-Yl)Oxy]-6,8,11-Trihydroxy-8-(2-Hydroxyacetyl)-1-Methoxy-5,7,8,9,10,12-Hexahydrotetracene-5,12-Dione	COC1=CC=CC2=C1C(=O)C1=C(O)C3=C(CC(O)(CC3OC3CC(N)C(O)C(C)O3)C(=O)CO)C(O)=C1C2=O	Pos	PMID: 26437739	Pubmed	Collected from prior studies which focused on developing QSAR models for DILI
1236	2-[(6,7-Dichloro-2-Methyl-1-Oxo-2-Phenyl-2,3-Dihydro-1H-Inden-5-Yl)Oxy]Acetic Acid	CC1(CC2=CC(OCC(O)=O)=C(Cl)C(Cl)=C2C1=O)C1=CC=CC=C1	Pos	PMID: 26437739	Pubmed	Collected from prior studies which focused on developing QSAR models for DILI
1237	1-(2-Methyl-3-Sulfanylpropanoyl)Pyrrolidine-2-Carboxylic Acid	CC(CS)C(=O)N1CCCC1C(O)=O	Pos	PMID: 26437739	Pubmed	Collected from prior studies which focused on developing QSAR models for DILI
1238	1-[3-Fluoro-4-Hydroxy-5-(Hydroxymethyl)Oxolan-2-Yl]-5-Iodo-1,2,3,4-Tetrahydropyrimidine-2,4-Dione	OCC1OC(C(F)C1O)N1C=C(I)C(=O)NC1=O	Pos	PMID: 26437739	Pubmed	Collected from prior studies which focused on developing QSAR models for DILI
1239	2-[(4-{[(2-Amino-5-Formyl-4-Oxo-1,4,5,6,7,8-Hexahydropteridin-6-Yl)Methyl]Amino}Phenyl)Formamido]Pentanedioic Acid	NC1=NC(=O)C2=C(NCC(CNC3=CC=C(C=C3)C(=O)NC(CCC(O)=O)C(O)=O)N2C=O)N1	Neg	PMID: 26437739	Pubmed	Collected from prior studies which focused on developing QSAR models for DILI
1240	2-[6-Chloro-2-(4-Chlorophenyl)Imidazo[1,2-A]Pyridin-3-Yl]-N,N-Dipropylacetamide	CCCN(CCC)C(=O)CC1=C(N=C2C=CC(Cl)=CN12)C1=CC=C(Cl)C=C1	Pos	PMID: 26437739	Pubmed	Collected from prior studies which focused on developing QSAR models for DILI
1241	Prop-2-En-1-Yl Formate	C=CCOC=O	Pos	PMID: 26437739	Pubmed	Collected from prior studies which focused on developing QSAR models for DILI
1242	6-Chloro-4-(2-Cyclopropylethynyl)-4-(Trifluoromethyl)-2,4-Dihydro-1H-3,1-Benzoxazin-2-One	FC(F)(F)C1(OC(=O)NC2=CC=C(Cl)C=C12)C#CC1CC1	Pos	PMID: 26437739	Pubmed	Collected from prior studies which focused on developing QSAR models for DILI
1243	2-[(2-Amino-6-Oxo-6,9-Dihydro-3H-Purin-9-Yl)Methoxy]-3-Hydroxypropyl 2-Amino-3-Methylbutanoate	CC(C)C(N)C(=O)OCC(CO)OCN1C=NC2=C1NC(N)=NC2=O	Neg	PMID: 26437739	Pubmed	Collected from prior studies which focused on developing QSAR models for DILI
1244	N-[4-(2-{[2-(4-Methanesulfonamidophenyl)Ethyl](Methyl)Amino}Ethoxy)Phenyl]Methanesulfonamide	CN(CCOC1=CC=C(NS(C)(=O)=O)C=C1)CCC1=CC=C(NS(C)(=O)=O)C=C1	Neg	PMID: 26437739	Pubmed	Collected from prior studies which focused on developing QSAR models for DILI
1245	1-[4-Hydroxy-5-(Hydroxymethyl)Oxolan-2-Yl]-5-Methyl-1,2,3,4-Tetrahydropyrimidine-2,4-Dione	CC1=CN(C2CC(O)C(CO)O2)C(=O)NC1=O	Pos	PMID: 26437739	Pubmed	Collected from prior studies which focused on developing QSAR models for DILI
1246	7-[4-(4-Fluorophenyl)-5-(Methoxymethyl)-2,6-Bis(Propan-2-Yl)Pyridin-3-Yl]-3,5-Dihydroxyhept-6-Enoic Acid	COCC1=C(N=C(C(C)C)C(C=CC(O)CC(O)CC(O)=O)=C1C1=CC=C(F)C=C1)C(C)C	Pos	PMID: 26437739	Pubmed	Collected from prior studies which focused on developing QSAR models for DILI
1247	Dimethyl[(5-{[(2-{[1-(Methylamino)-2-Nitroethenyl]Amino}Ethyl)Sulfanyl]Methyl}Furan-2-Yl)Methyl]Amine	CNC(NCCSCC1=CC=C(CN(C)C)O1)=C[N+]([O-])=O	Pos	PMID: 26437739	Pubmed	Collected from prior studies which focused on developing QSAR models for DILI
1248	2-[Amino(Hydroxy)Methylidene]-4,7-Bis(Dimethylamino)-10,11,12A-Trihydroxy-1,2,3,4,4A,5,5A,6,12,12A-Decahydrotetracene-1,3,12-Trione	CN(C)C1C2CC3CC4=C(C=CC(O)=C4C(O)=C3C(=O)C2(O)C(=O)C(=C(N)O)C1=O)N(C)C	Pos	PMID: 26437739	Pubmed	Collected from prior studies which focused on developing QSAR models for DILI
1249	1-(2-Amino-2-Carboxyethoxy)-2-(Diazyn-1-Ium-1-Yl)Ethen-1-Olate	NC(COC([O-])=C[N+]#N)C(O)=O	Pos	PMID: 26437739	Pubmed	Collected from prior studies which focused on developing QSAR models for DILI
1250	2-({[(2-Amino-1,3-Thiazol-4-Yl)[(2-Methyl-4-Oxo-1-Sulfoazetidin-3-Yl)Carbamoyl]Methylidene]Amino}Oxy)-2-Methylpropanoic Acid	CC1C(NC(=O)C(=NOC(C)(C)C(O)=O)C2=CSC(N)=N2)C(=O)N1S(O)(=O)=O	Neg	PMID: 26437739	Pubmed	Collected from prior studies which focused on developing QSAR models for DILI
1251	2-(4-{4,7-Dihydroxy-9A,11A-Dimethyl-Hexadecahydro-1H-Cyclopenta[A]Phenanthren-1-Yl}Pentanamido)Ethane-1-Sulfonic Acid	CC(CCC(=O)NCCS(O)(=O)=O)C1CCC2C3C(O)CC4CC(O)CCC4(C)C3CCC12C	Pos	PMID: 26437739	Pubmed	Collected from prior studies which focused on developing QSAR models for DILI
1252	2-Ethylhexyl 3-(4-Methoxyphenyl)Prop-2-Enoate	CCCCC(CC)COC(=O)C=CC1=CC=C(OC)C=C1	Pos	PMID: 26437739	Pubmed	Collected from prior studies which focused on developing QSAR models for DILI
1253	4-Hydroxy-2-Methyl-N-(5-Methyl-1,2-Oxazol-3-Yl)-1,1-Dioxo-2H-1Λ⁶,2-Benzothiazine-3-Carboxamide	CN1C(C(=O)NC2=NOC(C)=C2)=C(O)C2=CC=CC=C2S1(=O)=O	Neg	PMID: 26437739	Pubmed	Collected from prior studies which focused on developing QSAR models for DILI
1254	7-Chloro-4-(Dimethylamino)-1,6,10,11,12A-Pentahydroxy-6-Methyl-3,12-Dioxo-3,4,4A,5,5A,6,12,12A-Octahydrotetracene-2-Carboxamide	CN(C)C1C2CC3C(=C(O)C4=C(O)C=CC(Cl)=C4C3(C)O)C(=O)C2(O)C(O)=C(C(N)=O)C1=O	Pos	PMID: 26437739	Pubmed	Collected from prior studies which focused on developing QSAR models for DILI

## Sheet: Ai et al
Ai validation set
ID	Compound	SMILE	Label	Prediction (DILI)		Notes
				Present study	Ai et al	DILI: Drug induced liver injury
1	Mercaptopurine	S=C1N=CNC2=C1NC=N2	Pos	Pos	Pos
2	Azathioprine	CN1C=NC(=C1SC1=C2NC=NC2=NC=N1)[N+]([O-])=O	Pos	Pos	Pos
3	Gemfibrozil	CC1=CC=C(C)C(OCCCC(C)(C)C(O)=O)=C1	Pos	Pos	Pos
4	Indomethacin	COC1=CC2=C(C=C1)N(C(=O)C1=CC=C(Cl)C=C1)C(C)=C2CC(O)=O	Pos	Pos	Pos
5	Methotrexate	CN(CC1=NC2=C(N)N=C(N)N=C2N=C1)C1=CC=C(C=C1)C(=O)NC(CCC(O)=O)C(O)=O	Pos	Pos	Pos
6	Phenytoin	O=C1NC(=O)C(N1)(C1=CC=CC=C1)C1=CC=CC=C1	Pos	Pos	Pos
7	Amineptine	OC(=O)CCCCCCNC1C2=CC=CC=C2CCC2=CC=CC=C12	Pos	Pos	Neg
8	Amiodarone	CCCCC1=C(C(=O)C2=CC(I)=C(OCCN(CC)CC)C(I)=C2)C2=CC=CC=C2O1	Pos	Pos	Pos
9	Carbamazepine	NC(=O)N1C2=CC=CC=C2C=CC2=CC=CC=C12	Pos	Pos	Pos
10	Chlorzoxazone	ClC1=CC=C2OC(=O)NC2=C1	Pos	Pos	Pos
11	Diclofenac	OC(=O)CC1=CC=CC=C1NC1=C(Cl)C=CC=C1Cl	Pos	Pos	Pos
12	Diphenhydramine	CN(C)CCOC(C1=CC=CC=C1)C1=CC=CC=C1	Neg	Neg	Neg
13	Felbamate	NC(=O)OCC(COC(N)=O)C1=CC=CC=C1	Pos	Pos	Pos
14	Flutamide	CC(C)C(=O)NC1=CC=C(C(=C1)C(F)(F)F)[N+]([O-])=O	Pos	Pos	Pos
15	Iproniazid	CC(C)NNC(=O)C1=CC=NC=C1	Pos	Pos	Pos
16	Leflunomide	CC1=C(C=NO1)C(=O)NC1=CC=C(C=C1)C(F)(F)F	Pos	Pos	Pos
17	Nefazodone	CCC1=NN(CCCN2CCN(CC2)C2=CC=CC(Cl)=C2)C(=O)N1CCOC1=CC=CC=C1	Pos	Neg	Pos
18	Physostigmine	CNC(=O)OC1=CC=C2N(C)C3N(C)CCC3(C)C2=C1	Neg	Pos	Neg
19	Propylthiouracil	CCCC1=CC(=O)NC(=S)N1	Pos	Pos	Pos
20	Stavudine	CC1=CN(C2OC(CO)C=C2)C(=O)NC1=O	Pos	Pos	Pos
21	Streptomycin	CNC1C(O)C(O)C(CO)OC1OC1C(OC2C(O)C(O)C(N=C(N)N)C(O)C2N=C(N)N)OC(C)C1(O)C=O	Neg	Neg	Pos
22	Theophylline	CN1C2=C(NC=N2)C(=O)N(C)C1=O	Neg	Pos	Pos
23	Tolcapone	CC1=CC=C(C=C1)C(=O)C1=CC(O)=C(O)C(=C1)[N+]([O-])=O	Pos	Neg	Pos
24	Valproic Acid	CCCC(CCC)C(O)=O	Pos	Pos	Neg
25	Zidovudine	CC1=CN(C2CC(N=[N+]=[N-])C(CO)O2)C(=O)NC1=O	Pos	Pos	Pos
26	Ciprofloxacin	OC(=O)C1=CN(C2CC2)C2=CC(N3CCNCC3)=C(F)C=C2C1=O	Pos	Pos	Pos
27	Fluconazole	OC(CN1C=NC=N1)(CN1C=NC=N1)C1=CC=C(F)C=C1F	Pos	Pos	Pos
28	Hydrocortisone	CC12CC(O)C3C(CCC4=CC(=O)CCC34C)C1CCC2(O)C(=O)CO	Neg	Neg	Neg
29	Ergocalciferol	CC(C)C(C)C=CC(C)C1CCC2C(CCCC12C)=CC=C1CC(O)CCC1=C	Neg	Neg	Neg
30	Cytarabine	NC1=NC(=O)N(C=C1)C1OC(CO)C(O)C1O	Pos	Pos	Pos
31	Ticlopidine	ClC1=CC=CC=C1CN1CCC2=C(C1)C=CS2	Pos	Pos	Neg
32	Iothalamate Sodium	CNC(=O)C1=C(I)C(NC(C)=O)=C(I)C(C(O)=O)=C1I	Neg	Neg	Neg
33	Nevirapine	CC1=CC=NC2=C1NC(=O)C1=CC=CN=C1N2C1CC1	Pos	Pos	Pos
34	Primidone	CCC1(C(=O)NCNC1=O)C1=CC=CC=C1	Neg	Pos	Pos
35	Benzbromarone	CCC1=C(C(=O)C2=CC(Br)=C(O)C(Br)=C2)C2=CC=CC=C2O1	Pos	Pos	Pos
36	Busulfan	CS(=O)(=O)OCCCCOS(C)(=O)=O	Pos	Neg	Neg
37	Clozapine	CN1CCN(CC1)C1=C2C=CC=CC2=NC2=CC=C(Cl)C=C2N1	Pos	Pos	Pos
38	Dacarbazine	CN(C)NN=C1N=CN=C1C(N)=O	Pos	Pos	Pos
39	Disulfiram	CCN(CC)C(=S)SSC(=S)N(CC)CC	Pos	Pos	Neg
40	Isoniazid	NNC(=O)C1=CC=NC=C1	Pos	Pos	Pos
41	Niacin	OC(=O)C1=CC=CN=C1	Pos	Neg	Pos
42	Nimesulide	CS(=O)(=O)NC1=CC=C(C=C1OC1=CC=CC=C1)[N+]([O-])=O	Pos	Pos	Pos
43	Minocycline	CN(C)C1C2CC3CC4=C(C=CC(O)=C4C(O)=C3C(=O)C2(O)C(O)=C(C(N)=O)C1=O)N(C)C	Pos	Pos	Pos
44	Phentolamine	CC1=CC=C(C=C1)N(CC1=NCCN1)C1=CC=C(O)C=C1	Neg	Neg	Pos
45	Aminosalicylic Acid	NC1=CC=C(C(O)=O)C(O)=C1	Pos	Pos	Pos
46	Bromfenac	NC1=C(CC(O)=O)C=CC=C1C(=O)C1=CC=C(Br)C=C1	Pos	Pos	Pos
47	Danazol	CC12CCC3C(CCC4=CC5=C(CC34C)C=NO5)C1CCC2(O)C#C	Pos	Pos	Pos
48	Daunorubicin	COC1=CC=CC2=C1C(=O)C1=C(O)C3=C(CC(O)(CC3OC3CC(N)C(O)C(C)O3)C(C)=O)C(O)=C1C2=O	Neg	Pos	Pos
49	Febuxostat	CC(C)COC1=CC=C(C=C1C#N)C1=NC(C)=C(S1)C(O)=O	Pos	Pos	Pos
50	Griseofulvin	COC1=CC(OC)=C(Cl)C2=C1C(=O)C1(O2)C(C)CC(=O)C=C1OC	Pos	Pos	Pos
51	Ibufenac	CC(C)CC1=CC=C(CC(O)=O)C=C1	Pos	Pos	Pos
52	Deferasirox	OC(=O)C1=CC=C(C=C1)N1NC(NC1=C1C=CC=CC1=O)=C1C=CC=CC1=O	Pos	Pos	Pos
53	Methimazole	CN1C=CNC1=S	Pos	Pos	Pos
54	Minoxidil	NC1=CC(=NC(=N)N1O)N1CCCCC1	Neg	Pos	Pos
55	Sulfathiazole	NC1=CC=C(C=C1)S(=O)(=O)NC1=NC=CS1	Pos	Pos	Pos
56	Ticrynafen	OC(=O)COC1=CC=C(C(=O)C2=CC=CS2)C(Cl)=C1Cl	Pos	Pos	Pos
57	Raltegravir Potassium	CN1C(=O)C(O)=C(N=C1C(C)(C)NC(=O)C1=NN=C(C)O1)C(=O)NCC1=CC=C(F)C=C1	Pos	Pos	Pos
58	Tolvaptan	CC1=CC=CC=C1C(=O)NC1=CC=C(C(=O)N2CCCC(O)C3=CC(Cl)=CC=C23)C(C)=C1	Pos	Neg	Pos
59	Eltrombopag	CC1=C(NN=C2C=CC=C(C3=CC(=CC=C3)C(O)=O)C2=O)C(=O)N(N1)C1=CC(C)=C(C)C=C1	Pos	Pos	Pos
60	Saxagliptin Hydrochloride	[H]C12CC1([H])N(C(C2)C#N)C(=O)C(N)C12CC3CC(CC(O)(C3)C1)C2	Neg	Neg	Neg
61	Romidepsin	CC=C1NC(=O)C2CSSCCC=CC(CC(=O)NC(C(C)C)C(=O)N2)OC(=O)C(NC1=O)C(C)C	Neg	Pos	Pos
62	Dronedarone Hydrochloride	CCCCN(CCCC)CCCOC1=CC=C(C=C1)C(=O)C1=C(CCCC)OC2=CC=C(NS(C)(=O)=O)C=C12	Pos	Neg	Pos
63	Pazopanib	CN(C1=CC2=NN(C)C(C)=C2C=C1)C1=NC(NC2=CC=C(C)C(=C2)S(N)(=O)=O)=NC=C1	Pos	Pos	Pos
64	Divalproex Sodium	CCCC(CCC)C(=O)O.CCCC(CCC)C(=O)[O-].[Na+]	Pos	Pos	Neg
65	Lumiracoxib	CC1=CC=C(NC2=C(F)C=CC=C2Cl)C(CC(O)=O)=C1	Pos	Pos	Pos
66	Tasosartan	CC1=NC(C)=C2CCC(=O)N(CC3=CC=C(C=C3)C3=CC=CC=C3C3=NNN=N3)C2=N1	Pos	Pos	Pos
67	Tilbroquinol	CC1=CC(Br)=C(O)C2=C1C=CC=N2	Pos	Pos	Pos
68	Alclofenac	OC(=O)CC1=CC=C(OCC=C)C(Cl)=C1	Pos	Pos	Pos
69	Aplaviroc	CCCCN1C(=O)C(NC(=O)C11CCN(CC2=CC=C(OC3=CC=C(C=C3)C(O)=O)C=C2)CC1)C(O)C1CCCCC1	Pos	Pos	Pos
70	Clomacran	CN(C)CCCC1C2=CC=CC=C2NC2=CC=C(Cl)C=C12	Pos	Pos	Pos
71	Dermatan	CC(=O)NC1C(O)OC(CO)C(OS(O)(=O)=O)C1OC1OC(C(O)C(O)C1O)C(O)=O	Pos	Neg	Pos
72	Isaxonine	CC(C)NC1=NC=CC=N1	Pos	Pos	Pos
73	Pipamazine	NC(=O)C1CCN(CCCN2C3=CC=CC=C3SC3=CC=C(Cl)C=C23)CC1	Pos	Pos	Pos
74	Pralnacasan	CCOC1OC(=O)CC1NC(=O)C1CCCN2N1C(=O)C(CCC2=O)NC(=O)C1=NC=CC2=CC=CC=C12	Pos	Pos	Pos
75	Sulfacarbamide	NC(=O)NS(=O)(=O)C1=CC=C(N)C=C1	Pos	Pos	Pos
76	Triacetyldiphenolisatin	CC(=O)OC1=CC=C(C=C1)C1(C(=O)N(C(C)=O)C2=CC=CC=C12)C1=CC=C(OC(C)=O)C=C1	Pos	Pos	Pos
77	Fiduxosin	COC1=CC=CC2=C1C1CN(CCCCN3C(=O)NC4=C(SC5=NC=C(N=C45)C4=CC=CC=C4)C3=O)CC1CO2	Pos	Neg	Pos
78	Pafuramidine	CONC(=N)C1=CC=C(C=C1)C1=CC=C(O1)C1=CC=C(C=C1)C(=N)NOC	Pos	Pos	Pos
79	Phenoxypropazine	CC(COC1=CC=CC=C1)NN	Pos	Pos	Pos
80	Cortisone Acetate	CC(=O)OCC(=O)C1(O)CCC2C3CCC4=CC(=O)CCC4(C)C3C(=O)CC12C	Neg	Neg	Pos
81	Norepinephrine	NCC(O)C1=CC=C(O)C(O)=C1	Neg	Neg	Neg
82	Epinephrine	CNCC(O)C1=CC=C(O)C(O)=C1	Neg	Neg	Neg
83	Succinylcholine	C[N+](C)(C)CCOC(=O)CCC(=O)OCC[N+](C)(C)C	Neg	Neg	Neg

## Sheet: Zhang et al
Zhang validation set
ID	Compound	SMILE	Label	Prediction (DILI)		Notes
				Present study	Zhang et al	DILI: Drug induced liver injury
1	-	CC(N)C(=O)NC(C)C(=O)NC1C2CN(CC12)C1=NC2=C(C=C1F)C(=O)C(=CN2C1=CC=C(F)C=C1F)C(O)=O	Pos	Pos	Not available
2	-	OC(=O)CC1=CC=C(OCC=C)C(Cl)=C1	Pos	Pos	Not available
3	-	OC(=O)CCCCCCNC1C2=CC=CC=C2CCC2=CC=CC=C12	Pos	Pos	Not available
4	-	CN(C)CCCC1C2=CC=CC=C2NC2=CC=C(Cl)C=C12	Pos	Pos	Not available
5	-	COC1=CC=C2C(=C1)N(CC(O)=O)C(C)=C2C(=O)C1=CC=C(Cl)C=C1	Pos	Pos	Not available
6	-	CC(=O)OC1=CC=C(C=C1)C(=C1CCCCC1)C1=CC=C(OC(C)=O)C=C1	Pos	Neg	Not available
7	-	CN1C2=C(OC(=O)N(C2=O)C2=CC=CC=N2)C2=CC=CC=C2S1(=O)=O	Pos	Pos	Not available
8	-	NC(N)=NC1=NC(CSCCN=CNS(=O)(=O)C2=CC=C(Br)C=C2)=CS1	Pos	Pos	Not available
9	-	OC1=CC=C(C(=O)C2=CC(O)=C(O)C(O)=C2)C(O)=C1O	Pos	Neg	Not available
10	-	OC(=O)CC1=CSC(=N1)C1=CC=C(Cl)C=C1	Pos	Pos	Not available
11	-	CC(NN)C1=CC=CC=C1	Pos	Neg	Not available
12	-	CN1CCCC(CN2C3=CC=CC=C3SC3=CC=CC=C23)C1	Pos	Pos	Not available
13	-	CN(C)CC1=CC=C(CSCCNC(NCC2=CC=C3OCOC3=C2)=C[N+]([O-])=O)O1	Pos	Pos	Not available
14	-	CC1=NC(=CN1C1=CC=C(C=C1)[N+]([O-])=O)[N+]([O-])=O	Pos	Pos	Not available
15	-	CC(COC1=CC=CC=C1)NN	Pos	Pos	Not available
16	-	NC(=O)C1CCN(CCCN2C3=CC=CC=C3SC3=CC=C(Cl)C=C23)CC1	Pos	Pos	Not available
17	-	NC(=O)NS(=O)(=O)C1=CC=C(N)C=C1	Pos	Pos	Not available
18	-	NC1=CC=C(C=C1)S(=O)(=O)NC1=NC=CS1	Pos	Pos	Not available
19	-	CC1=CC(Br)=C(O)C2=NC=CC=C12	Pos	Pos	Not available
20	-	CC(=O)OC1=CC=C(C=C1)C1(C(=O)N(C(C)=O)C2=CC=CC=C12)C1=CC=C(OC(C)=O)C=C1	Pos	Pos	Not available
21	-	NC1C2CN(CC12)C1=NC2=C(C=C1F)C(=O)C(=CN2C1=CC=C(F)C=C1F)C(O)=O	Pos	Pos	Not available
22	-	CCOC(NC1=CC=C(C=C1)C(O)=O)C(=O)C1=CC=C(C=C1)C1=CC=CC=C1	Pos	Neg	Not available
23	-	CCOC(=O)CNC(C1CCCCC1)C(=O)N1CCC1C(=O)NCC1=CC=C(C=C1)C(N)=NO	Pos	Neg	Not available
24	-	CN(C)CC=C(C1=CC=C(Br)C=C1)C1=CC=CN=C1	Pos	Pos	Not available
25	-	[O-][N+](=O)C1=CC=C(C=C1)C1=CC=C(O1)C=NN1CC(=O)NC1=O	Pos	Pos	Not available
26	-	CC(=O)N1CCN(CC1)C1=CC=C(OCC2COC(CN3C=CN=C3)(O2)C2=CC=C(Cl)C=C2Cl)C=C1	Pos	Neg	Not available
27	-	CC1(O)CCC2C3CCC4CC(=O)OCC4(C)C3CCC12C	Pos	Pos	Not available
28	-	CC1(O)CCC2C3CCC4CC(=O)C(CC4(C)C3CCC12C)=CO	Pos	Pos	Not available
29	-	CN(C1=CC2=NN(C)C(C)=C2C=C1)C1=CC=NC(NC2=CC=C(C)C(=C2)S(N)(=O)=O)=N1	Pos	Pos	Not available
30	-	CCN(CC)CCNC(=O)C1=C(C)NC(C=C2C(=O)NC3=CC=C(F)C=C23)=C1C	Pos	Neg	Not available
31	-	CC(CN1C=NC2=C(N)N=CN=C12)OCP(O)(O)=O	Pos	Neg	Not available
32	-	CCCC1(CCC2=CC=CC=C2)CC(=O)C(C(CC)C2=CC=CC(NS(=O)(=O)C3=CC=C(C=N3)C(F)(F)F)=C2)=C(O)O1	Pos	Pos	Not available
33	-	OC(=O)C1=CC=C(C=C1)N1NC(NC1=C1C=CC=CC1=O)=C1C=CC=CC1=O	Pos	Pos	Not available
34	-	CN(C)NN=C1N=CN=C1C(N)=O	Pos	Pos	Not available
35	-	CC1=C(NN=C2C=CC=C(C3=CC=CC(=C3)C(O)=O)C2=O)C(=O)N(N1)C1=CC=C(C)C(C)=C1	Pos	Pos	Not available
36	-	COC1=CC(C)=C(C=CC(C)=CC=CC(C)=CC(O)=O)C(C)=C1C	Pos	Pos	Not available
37	-	NC1=NC(=O)N(C=C1)C1OC(CO)C(O)C1O	Pos	Pos	Not available
38	-	CC(C)C1=NN=C(C)N1C1CC2CCC(C1)N2CCC(NC(=O)C1CCC(F)(F)CC1)C1=CC=CC=C1	Pos	Neg	Not available
39	-	CC(N)C(=O)OC(C)(C)CC1=CC=C(Cl)C=C1	Pos	Neg	Not available
40	-	CCCCN1C(=O)C(NC(=O)C11CCN(CC2=CC=C(OC3=CC=C(C=C3)C(O)=O)C=C2)CC1)C(O)C1CCCCC1	Pos	Pos	Not available
41	-	CC(=O)NC1C(O)OC(CO)C(OS(O)(=O)=O)C1OC1OC(C(O)C(O)C1O)C(O)=O	Pos	Neg	Not available
42	-	CN1CCC(CC1)NC1=NC2=C(NC3=CC=C(F)C(Cl)=C3)N=CN=C2C=N1	Pos	Pos	Not available
43	-	COC1=CC=CC2=C1C1CN(CCCCN3C(=O)NC4=C(SC5=NC=C(N=C45)C4=CC=CC=C4)C3=O)CC1CO2	Pos	Neg	Not available
44	-	CON=C(N)C1=CC=C(C=C1)C1=CC=C(O1)C1=CC=C(C=C1)C(N)=NOC	Pos	Pos	Not available
45	-	CCOC1OC(=O)CC1NC(=O)C1CCCN2N1C(=O)C(CCC2=O)NC(=O)C1=NC=CC2=CC=CC=C12	Pos	Pos	Not available
46	-	NC1=NC(NC2CC2)=C2N=CN(C3CC(CO)C=C3)C2=N1	Pos	Pos	Not available
47	-	CC(O)(CS(=O)(=O)C1=CC=C(F)C=C1)C(=O)NC1=CC=C(C#N)C(=C1)C(F)(F)F	Pos	Pos	Not available
48	-	ClC1=CC=C2OC(=O)NC2=C1	Pos	Pos	Not available
49	-	CCC(CO)NCCNC(CC)CO	Pos	Neg	Not available
50	-	S=C1N=CNC2=C1NC=N2	Pos	Pos	Not available
51	-	CN1C=CNC1=S	Pos	Pos	Not available
52	-	CC(N)(CC1=CC=C(O)C(O)=C1)C(O)=O	Pos	Neg	Not available
53	-	[O-][N+](=O)C1=CC=C(O1)C=NN1CC(=O)NC1=O	Pos	Pos	Not available
54	-	CCCCCCCCCCCC(CC1OC(=O)C1CCCCCC)OC(=O)C(CC(C)C)NC=O	Pos	Neg	Not available
55	-	CC1=C(CC(O)=O)C2=CC(F)=CC=C2C1=CC1=CC=C(C=C1)S(C)=O	Pos	Pos	Not available
56	-	CN(CC=CC#CC(C)(C)C)CC1=CC=CC2=CC=CC=C12	Pos	Neg	Not available
57	-	CC1OC(OC2C(CO)OC(OC3C(CO)OC(O)C(O)C3O)C(O)C2O)C(O)C(O)C1NC1C=C(CO)C(O)C(O)C1O	Pos	Neg	Not available
58	-	CCC1OC(=O)C(C)C(OC2CC(C)(OC)C(O)C(C)O2)C(C)C(OC2OC(C)CC(C2O)N(C)C)C(C)(O)CC(C)C(=O)C(C)C(O)C1(C)O	Pos	Pos	Not available
59	-	CN1C2CCC1CC(C2)OC(=O)C(CO)C1=CC=CC=C1	Neg	Neg	Not available
60	-	CCCCNC1=CC=C(C=C1)C(=O)OCCOCCOCCOCCOCCOCCOCCOCCOCCOC	Neg	Neg	Not available
61	-	CC(CC1=CC=CC=C1)N(C)CC1=CC=CC=C1	Neg	Neg	Not available
62	-	CN1C2CCC1CC(C2)OC(C1=CC=CC=C1)C1=CC=CC=C1	Neg	Neg	Not available
63	-	C[N+](C)(C)CC([O-])=O	Neg	Neg	Not available
64	-	CC(C[N+](C)(C)C)OC(N)=O	Neg	Neg	Not available
65	-	OC(CCN1CCCCC1)(C1CC2CC1C=C2)C1=CC=CC=C1	Neg	Neg	Not available
66	-	CN(C)CCOC(C1=CC=C(Cl)C=C1)C1=CC=CC=N1	Neg	Neg	Not available
67	-	NC(NC1=CC=C(Cl)C=C1)=NC(N)=NCCCCCCN=C(N)N=C(N)NC1=CC=C(Cl)C=C1	Neg	Neg	Not available
68	-	CN1CC(CC2C1CC1=CNC3=CC=CC2=C13)C(=O)NC1(C)OC2(O)C3CCCN3C(=O)C(CC3=CC=CC=C3)N2C1=O	Neg	Neg	Not available
69	-	CN(C)CCOC(C1=CC=CC=C1)C1=CC=CC=C1	Neg	Neg	Not available
70	-	CNCC(O)C1=CC=C(O)C(O)=C1	Neg	Neg	Not available
71	-	CCCCCCCCC=CCCCCCCCC(O)=O	Neg	Pos	Not available
72	-	CC1=C(OC2=C(C=CC=C2C1=O)C(=O)OCCN1CCCCC1)C1=CC=CC=C1	Neg	Neg	Not available
73	-	NC(N)=NCCN1CCCCCCC1	Neg	Pos	Not available
74	-	OCC1OC(O)(CO)C(O)C1OC1OC(CO)C(O)C(O)C1O	Neg	Neg	Not available
75	-	C[N+](C)(C)CC(O)CC([O-])=O	Neg	Neg	Not available
76	-	OCC(O)C(O)C(O)C(O)CO	Neg	Neg	Not available
77	-	CC(N)(CC1=CC=C(O)C=C1)C(O)=O	Neg	Neg	Not available
78	-	NC1=CC(=NC(=N)N1O)N1CCCCC1	Neg	Pos	Not available
79	-	NCC1OC(OC2C(CO)OC(OC3C(O)C(N)CC(N)C3OC3OC(CN)C(O)C(O)C3N)C2O)C(N)C(O)C1O	Neg	Neg	Not available
80	-	NCC(O)C1=CC=C(O)C(O)=C1	Neg	Neg	Not available
81	-	CC1C(OCCN1C)C1=CC=CC=C1	Neg	Pos	Not available
82	-	CC(C)(N)CC1=CC=CC=C1	Neg	Neg	Not available
83	-	OC(CCN1CCCC1)(C1CCCCC1)C1=CC=CC=C1	Neg	Neg	Not available
84	-	C[N+](C)(C)CCOC(=O)CCC(=O)OCC[N+](C)(C)C	Neg	Neg	Not available
85	-	CCOC1=CC=CC=C1OCCNC(C)CC1=CC=C(OC)C(=C1)S(N)(=O)=O	Neg	Pos	Not available

## Sheet: Kotsampasakou et al
Kotsampasakou validation set
ID	Compound	SMILE	Label	Prediction (DILI)		Notes
				Present study	Kotsampasakou et al	DILI: Drug induced liver injury
1	Tetracycline	CN(C)C1C2CC3C(=C(O)C4=C(O)C=CC=C4C3(C)O)C(=O)C2(O)C(=O)C(=C(N)O)C1=O	Pos	Pos	Pos
2	Valdecoxib	CC1=C(C(=NO1)C1=CC=CC=C1)C1=CC=C(C=C1)S(N)(=O)=O	Pos	Pos	Pos
3	Rosuvastatin	CC(C)C1=NC(=NC(C2=CC=C(F)C=C2)=C1CCC(O)CC(O)CC(O)=O)N(C)S(C)(=O)=O	Pos	Pos	Pos
4	Cefazolin	CC1=NN=C(SCC2=C(N3C(SC2)C(NC(=O)CN2C=NN=N2)C3=O)C(O)=O)S1	Pos	Pos	Pos
5	Cefuroxime	CON=C(C(=O)NC1C2SCC(COC(N)=O)=C(N2C1=O)C(O)=O)C1=CC=CO1	Pos	Pos	Neg
6	Clomiphene	CCN(CC)CCOC1=CC=C(C=C1)C(=C(Cl)C1=CC=CC=C1)C1=CC=CC=C1	Pos	Pos	Pos
7	Chlorcyclizine	CN1CCN(CC1)C(C1=CC=CC=C1)C1=CC=C(Cl)C=C1	Neg	Neg	Pos
8	Adefovir	NC1=C2N=CN(CCOCP(O)(O)=O)C2=NC=N1	Neg	Neg	Pos
9	Perphenazine	OCCN1CCN(CCCN2C3=CC=CC=C3SC3=CC=C(Cl)C=C23)CC1	Pos	Pos	Neg
10	Haloperidol	OC1(CCN(CCCC(=O)C2=CC=C(F)C=C2)CC1)C1=CC=C(Cl)C=C1	Pos	Neg	Neg
11	Tacrolimus	COC1CC(CCC1O)C=C(C)C1OC(=O)C2CCCCN2C(=O)C(=O)C2(O)OC(C(CC2C)OC)C(CC(C)CC(C)=CC(CC=C)C(=O)CC(O)C1C)OC	Pos	Pos	Pos
12	Remifentanil	CCC(=O)N(C1=CC=CC=C1)C1(CCN(CCC(=O)OC)CC1)C(=O)OC	Neg	Neg	Pos
13	Cephalexin	CC1=C(N2C(SC1)C(NC(=O)C(N)C1=CC=CC=C1)C2=O)C(O)=O	Pos	Pos	Neg
14	Chlordiazepoxide	CN=C1CN(O)C(C2=CC=CC=C2)=C2C=C(Cl)C=CC2=N1	Pos	Neg	Pos
15	Raltegravir	CN1C(=O)C(=O)C(N=C1C(C)(C)NC(=O)C1=NN=C(C)O1)=C(O)NCC1=CC=C(F)C=C1	Pos	Pos	Pos
16	Irinotecan	CCC1=C2CN3C(=CC4=C(COC(=O)C4(O)CC)C3=O)C2=NC2=CC=C(OC(=O)N3CCC(CC3)N3CCCCC3)C=C12	Pos	Neg	Neg
17	Diltiazem	COC1=CC=C(C=C1)C1SC2=CC=CC=C2N(CCN(C)C)C(=O)C1OC(C)=O	Pos	Pos	Neg
18	Sulfasalazine	OC(=O)C1=CC(C=CC1=O)=NNC1=CC=C(C=C1)S(=O)(=O)NC1=CC=CC=N1	Pos	Pos	Pos
19	Methyldopa	COC(=O)C(N)CC1=CC=C(O)C(O)=C1	Pos	Neg	Neg
20	Griseofulvin	COC1CC(=O)CC(C)C11OC2=C(C1=O)C(OC)=CC(OC)=C2Cl	Pos	Pos	Pos
21	Oxaliplatin	NC1CCCCC1N	Pos	Pos	Neg
22	Gemcitabine	NC1=NC(=O)N(C=C1)C1OC(CO)C(O)C1(F)F	Pos	Pos	Pos
23	Thiabendazole	N1C2=CC=CC=C2N=C1C1=CSC=N1	Pos	Pos	Pos
24	Febuxostat	CC(C)COC1=CC=C(C=C1C#N)C1=NC(C)=C(S1)C(O)=O	Pos	Pos	Pos
25	Nandrolone Decanoate	CCCCCCCCCC(=O)OC1CCC2C3CCC4=CC(=O)CCC4C3CCC12C	Pos	Neg	Neg
26	Dacarbazine	CN(C)NN=C1N=CN=C1C(N)=O	Pos	Pos	Neg
27	Propylthiouracil	CCCN1C(=O)C=CNC1=S	Pos	Pos	Pos
28	Pentostatin	OCC1OC(CC1O)N1C=NC2=C1NC=NCC2O	Pos	Pos	Neg
29	Phenoxypropazine	CC(COC1=CC=CC=C1)NN	Pos	Pos	Neg
30	Nialamide	O=C(CCNNC(=O)C1=CC=NC=C1)NCC1=CC=CC=C1	Pos	Pos	Pos
31	Caffeine	CN1C=NC2=C1C(=O)N(C)C(=O)N2C	Neg	Pos	Neg
32	Aminocaproic Acid	CCCCC(N)C(O)=O	Neg	Neg	Neg
33	Vitamin C	OCC(O)C1OC(=O)C(O)=C1O	Neg	Neg	Neg
34	Morphine	CN1CCC23C4OC5=C2C(CC1C3C=CC4O)=CC=C5O	Pos	Neg	Neg
35	Vorinostat	ONC(=O)CCCCCCC(=O)NC1=CC=CC=C1	Neg	Pos	Pos
36	Selegiline	CC(CC1=CC=CC=C1)N(C)CC#C	Neg	Pos	Neg
37	Tapentadol	CCC(C(C)CN(C)C)C1=CC=CC(O)=C1	Neg	Neg	Neg
38	Benzphetamine	CC(CC1=CC=CC=C1)N(C)CC1=CC=CC=C1	Neg	Neg	Pos
39	Sodium Polystyrene Sulfonate	OS(=O)(=O)C1=CC=CC=C1C=C	Neg	Pos	Pos
40	Lactulose	OCC1OC(O)(CO)C(O)C1OC1OC(CO)C(O)C(O)C1O	Neg	Neg	Neg
41	Calcitriol	CC(CCCC(C)(C)O)C1CCC2C(CCCC12C)=CC=C1CC(O)CC(O)C1=C	Neg	Neg	Neg
42	Ranolazine	COC1=CC=CC=C1OCC(O)CN1CCN(CC(=O)NC2=C(C)C=CC=C2C)CC1	Neg	Neg	Neg
43	Alvimopan	CC1CN(CC(CC2=CC=CC=C2)C(=O)NCC(O)=O)CCC1(C)C1=CC=CC(O)=C1	Neg	Neg	Neg
44	Lubiprostone	CCCCC(F)(F)C1(O)CCC2C(CC(=O)C2CCCCCCC(O)=O)O1	Neg	Neg	Neg
45	Riboflavin	CC1=CC2=C(C=C1C)N(CC(O)C(O)C(O)CO)C1=NC(=O)NC(=O)C1=N2	Neg	Pos	Neg
46	Pamabrom	CN1C2=C(NC(Br)=N2)C(=O)N(C)C1=O	Neg	Pos	Pos
47	Meprobamate	CCCC(C)(COC(N)=O)COC(N)=O	Neg	Neg	Pos
48	Adenosine	NC1=C2N=CN(C3OC(CO)C(O)C3O)C2=NC=N1	Neg	Pos	Pos
49	Frovatriptan	CNC1CCC2=C(C1)C1=CC(=CC=C1N2)C(N)=O	Neg	Pos	Neg
50	Fludarabine	NC1=C2N=CN(C3OC(CO)C(O)C3O)C2=NC(F)=N1	Neg	Pos	Pos
51	Loratadine	CCOC(=O)N1CCC(CC1)=C1C2=CC=C(Cl)C=C2CCC2=CC=CN=C12	Neg	Pos	Neg
52	Aminohippurate	NOC(=O)CNC(=O)C1=CC=CC=C1	Neg	Pos	Neg
53	Indocyanine Green	CC1(C)C(=CC=CC=CC=CC2=[N+](CCCCS(O)(=O)=O)C3=C(C4=CC=CC=C4C=C3)C2(C)C)N(CCCCS(O)(=O)=O)C2=C1C1=CC=CC=C1C=C2	Neg	Neg	Pos
54	Dextrose	OCC(O)C(O)C(O)C(O)C=O	Neg	Neg	Neg
55	Protirelin	NC(=O)C1CCCN1C(=O)C(CC1=CN=CN1)NC(=O)C1CCC(=O)N1	Neg	Pos	Neg
56	Clevidipine	CCCC(=O)OCOC(=O)C1=C(C)NC(C)=C(C1C1=CC=CC(Cl)=C1Cl)C(=O)OC	Neg	Neg	Pos
57	Regadenoson	CNC(=O)C1=CN(N=C1)C1=NC(N)=C2N=CN(C3OC(CO)C(O)C3O)C2=N1	Neg	Neg	Neg
58	Pentetic Acid	OC(=O)CN(CCN(CC(O)=O)CC(O)=O)CCN(CC(O)=O)CC(O)=O	Neg	Neg	Neg
59	Carboprost Tromethamine	CCCCCC(C)(O)C=CC1C(O)CC(O)C1CC=CCCCC(O)=O	Neg	Neg	Neg
60	Ethanolamine Oleate	CCCCCCCCC=CCCCCCCCC(=O)OCCN	Neg	Neg	Neg
61	Gadoteridol	CC(O)CN1CCN(CC(O)=O)CCN(CC(O)=O)CCN(CC(O)=O)CC1	Neg	Pos	Neg
62	Argatroban	CC1CCN(C(C1)C(O)=O)C(=O)C(CCCN=C(N)N)NS(=O)(=O)C1=CC=CC2=C1NCC(C)C2	Neg	Pos	Pos
63	Amikacin	NCCC(O)C(=O)NC1CC(N)C(OC2OC(CN)C(O)C(O)C2O)C(O)C1OC1OC(CO)C(O)C(N)C1O	Neg	Neg	Neg
64	Conivaptan	CC1=NC2=C(CCN(C(=O)C3=CC=C(NC(=O)C4=CC=CC=C4C4=CC=CC=C4)C=C3)C3=CC=CC=C23)N1	Neg	Neg	Neg
65	Etomidate	CCOC(=O)C1=CN=CN1C(C)C1=CC=CC=C1	Neg	Pos	Pos
66	Exametazime	CC(NCC(C)(C)CNC(C)C(C)=NO)C(C)=NO	Neg	Neg	Neg
67	Tyramine	NCCC1=CC=C(O)C=C1	Neg	Pos	Neg

## Sheet: Reverse validation
Reverse validation set
ID	Compound	SMILE	Source(PMID/DOI)	Database source	Annatation	Label	Prediction (DILI)		Notes
							Present study	Ai et al	CNKI: China National Knowledge Infrastructure Database
1	Hydroquinone	OC1=CC=C(O)C=C1	PMID: 24296864	Pubmed	Collected by the present study	Neg	Pos	Pos	DILI: Drug induced liver injury
2	α-Phellandrene	CC(C)C1CC=C(C)C=C1	PMID: 17490493	Pubmed	Collected by the present study	Neg	Pos	Pos
3	Trigonelline	C[N+]1=CC=CC(=C1)C([O-])=O	DOI: 10.11569/wcjd.v24.i15.2347	CNKI	Collected by the present study	Neg	Pos	Pos
4	Protocatechuic Aldehyde	OC1=C(O)C=C(C=O)C=C1	PMID: 23730837	Pubmed	Collected by the present study	Neg	Pos	Pos
5	Anethole	COC1=CC=C(C=CC)C=C1	PMID: 25587347	Pubmed	Collected by the present study	Neg	Neg	Pos
6	Thymol	CC(C)C1=C(O)C=C(C)C=C1	PMID: 26683486	Pubmed	Collected by the present study	Neg	Neg	Pos
7	Protocatechuic Acid	OC(=O)C1=CC(O)=C(O)C=C1	PMID: 29616383	Pubmed	Collected by the present study	Neg	Pos	Pos
8	Capillene	CC#CC#CCC1=CC=CC=C1	1001-5256(2011)05-0451-07	CNKI	Collected by the present study	Neg	Neg	Pos
9	Beta-Isosafrole	CC=CC1=CC2=C(OCO2)C=C1	1003-3734(2016)23-2647-06	CNKI	Collected by the present study	Neg	Neg	Pos
10	Thymoquinone	CC(C)C1=CC(=O)C(C)=CC1=O	PMID: 28070230	Pubmed	Collected by the present study	Neg	Pos	Pos
11	Vanillic Acid	COC1=C(O)C=CC(=C1)C(O)=O	PMID: 26119956	Pubmed	Collected by the present study	Neg	Neg	Pos
12	(-)-1-P-Menthene-7,8-Diol	CC(C)(O)C1CCC(CO)=CC1	PMID: 15104485	Pubmed	Collected by the present study	Neg	Pos	Pos
13	Capillone	CC=CC=CC(=O)C1=CC=CC=C1	1001-5256(2011)05-0451-07	CNKI	Collected by the present study	Neg	Neg	Pos
14	Shikimic Acid	OC1CC(=CC(O)C1O)C(O)=O	PMID: 29309862	Pubmed	Collected by the present study	Neg	Neg	Neg
15	Erythrocentaurin	O=CC1=CC=CC2=C1CCOC2=O	PMID: 27350107	Pubmed	Collected by the present study	Neg	Pos	Pos
16	Sulforaphane	CS(=O)CCCCN=C=S	DOI: 10.3969/j.issn.1001-1528.2017.01.031	CNKI	Collected by the present study	Neg	Pos	Neg
17	Caffeic Acid	OC(=O)C=CC1=CC(O)=C(O)C=C1	PMID: 29953177	Pubmed	Collected by the present study	Neg	Neg	Pos
18	Vasicine	OC1CCN2CC3=CC=CC=C3N=C12	PMID: 22136107	Pubmed	Collected by the present study	Neg	Pos	Neg
19	Kynurenic Acid	OC(=O)C1=CC(=O)C2=CC=CC=C2N1	PMID: 30327755	Pubmed	Collected by the present study	Neg	Neg	Pos
20	Quinic Acid	OC1CC(O)(CC(O)C1O)C(O)=O	PMID: 29309862	Pubmed	Collected by the present study	Neg	Neg	Neg
21	Daphnetin 8-Methyl Ether	COC1=C(O)C=CC2=C1OC(=O)C=C2	PMID: 17490493	Pubmed	Collected by the present study	Neg	Neg	Pos
22	β-Ionone	CC(=O)C=CC1=C(C)CCCC1(C)C	PMID: 26828466	Pubmed	Collected by the present study	Neg	Pos	Pos
23	Acetyl Ilicifolius Alkaloids A	CC(=O)OC1=CC=CC2=C1NC(=O)O2	DOI: 10.3969/j.issn.1008-0805.2011.10.023	CNKI	Collected by the present study	Neg	Neg	Pos
24	Ononitol	COC1C(O)C(O)C(O)C(O)C1O	PMID: 29309862	Pubmed	Collected by the present study	Neg	Neg	Neg
25	Angelical	COC1=C(C=O)C=C2C=CC(=O)OC2=C1	PMID: 17490493	Pubmed	Collected by the present study	Neg	Neg	Pos
26	6,7-Dimethylesculetin	COC1=C(OC)C=C2C=CC(=O)OC2=C1	PMID: 29710478	Pubmed	Collected by the present study	Neg	Neg	Pos
27	R-Lipoic Acid	OC(=O)CCCCC1CCSS1	PMID: 28070230	Pubmed	Collected by the present study	Neg	Pos	Neg
28	Anthocyanins	C1=CC=C(C=C1)C1=[O+]C2=CC=CC=C2C=C1	PMID: 22136107	Pubmed	Collected by the present study	Neg	Pos	Pos
29	Methyl Ferulic Acid	COC(=O)C=CC1=CC=C(O)C(OC)=C1	PMID: 29940154	Pubmed	Collected by the present study	Neg	Pos	Pos
30	4-(2-Formyl-5-Methoxy-1H-Pyrrol-1-Yl)Butanoic Acid	COC1=CC=C(C=O)N1CCCC(O)=O	PMID: 19844860	Pubmed	Collected by the present study	Neg	Neg	Pos
31	1-Hydroxyacridone	OC1=CC=CC2=C1C(=O)C1=CC=CC=C1N2	PMID: 17490493	Pubmed	Collected by the present study	Neg	Pos	Pos
32	Harmaline	COC1=CC2=NC3=C(C)NCCC3=C2C=C1	PMID: 25587347	Pubmed	Collected by the present study	Neg	Pos	Pos
33	Atractylon	CC1=COC2=C1CC1C(=C)CCCC1(C)C2	DOI: 10.6039/j.issn.1001-0408.2016.16.18	CNKI	Collected by the present study	Neg	Pos	Pos
34	β-Vetivone	CC1CC(=O)C=C(C)C11CCC(C1)=C(C)C	PMID: 22136107	Pubmed	Collected by the present study	Neg	Pos	Pos
35	α-Vetivone	CC1CC(=O)C=C2CCC(CC12C)=C(C)C	PMID: 22136107	Pubmed	Collected by the present study	Neg	Pos	Pos
36	Xanthorrhizol	CC(CCC=C(C)C)C1=CC(O)=C(C)C=C1	PMID: 30257340	Pubmed	Collected by the present study	Neg	Pos	Pos
37	Caryophyllene Oxide	CC12CCC3C(CC3(C)C)C(=C)CCC1O2	PMID: 17490493	Pubmed	Collected by the present study	Neg	Pos	Neg
38	β-Eudesmol	CC(C)(O)C1CCC2(C)CCCC(=C)C2C1	DOI: 10.6039/j.issn.1001-0408.2016.16.18	CNKI	Collected by the present study	Neg	Pos	Neg
39	Bisabolol	CC(C)=CCCC(C)(O)C1CCC(C)=CC1	PMID: 25587347	Pubmed	Collected by the present study	Neg	Pos	Neg
40	Sinapic Acid	COC1=CC(C=CC(O)=O)=CC(OC)=C1O	PMID: 21864513	Pubmed	Collected by the present study	Neg	Neg	Pos
41	Methyl 4-(2-Formyl-5-Methoxy-1H-Pyrrol-1- Yl)Butanoate	COC(=O)CCCN1C(OC)=CC=C1C=O	PMID: 19844860	Pubmed	Collected by the present study	Neg	Pos	Pos
42	Sparteine	C1CCN2CC3CC(CN4CCCCC34)C2C1	PMID: 21595500	Pubmed	Collected by the present study	Neg	Pos	Neg
43	2,10,10-Trimethyl-6-Methylidenecycloundeca-2,8-Diene-1,5-Diol	CC1=CCC(O)C(=C)CC=CC(C)(C)CC1O	PMID: 15104485	Pubmed	Collected by the present study	Neg	Pos	Neg
44	1,5,8,8-Tetramethylbicyclo[8.1.0]Undec-5-Ene-2,9-Diol	[H]C12CC1(C)C(O)CCC(C)=CCC(C)(C)C2O	PMID: 15104485	Pubmed	Collected by the present study	Neg	Neg	Neg
45	1,7-Dihydroxy-N-Methylacridone	CN1C2=CC=C(O)C=C2C(=O)C2=C(O)C=CC=C12	PMID: 17490493	Pubmed	Collected by the present study	Neg	Pos	Pos
46	Lapachol	CC(C)=CCC1=C(O)C2=CC=CC=C2C(=O)C1=O	PMID: 22136107	Pubmed	Collected by the present study	Neg	Pos	Pos
47	4,5-Dihydroblumenol	CC(O)C=CC12OC1(C)CC(O)C(O)C2(C)C	DOI: 10.15991/j.cnki.41-1361/r.2011.04.006	CNKI	Collected by the present study	Neg	Pos	Neg
48	Linderalactone	CC1=COC2=C1C1OC(=O)C(CCC=C(C)C2)=C1	-	CNKI	Collected by the present study	Neg	Pos	Pos
49	Achilline	CC1C2CCC(C)=C3C(C2OC1=O)C(C)=CC3=O	PMID: 22136107	Pubmed	Collected by the present study	Neg	Pos	Pos
50	Hydroxylindestrenolide	CC1C(=O)OC2(O)CC3(C)C=CCC(=C)C3C=C12	-	CNKI	Collected by the present study	Neg	Pos	Pos
51	Sophocarpine	O=C1C=CCC2C3CCCN4CCCC(CN12)C34	PMID: 27570425	Pubmed	Collected by the present study	Neg	Pos	Neg
52	Tryptanthrin	O=C1C2=NC3=CC=CC=C3C(=O)N2C2=CC=CC=C12	DOI：10.13193/j.archtcm.2012.11.69.maby.061	CNKI	Collected by the present study	Neg	Pos	Pos
53	6-Hydroxymelatonin	COC1=C(O)C=C2NC=C(CCNC(C)=O)C2=C1	1000-2790(2006)18-1665-03	CNKI	Collected by the present study	Neg	Neg	Neg
54	Curcumenolactone A，Curcumenolactone B	CC(=O)CCC1C2CC3=C(C)C(=O)OC3CC12C	PMID: 11354673	Pubmed	Collected by the present study	Neg	Pos	Neg
55	1,6,6,10-Tetramethyl-4,9,14-Trioxatetracyclo[11.1.0.0³,⁵.0⁸,¹⁰]Tetradecane	[H]C12CC3(C)OC3([H])CCC3(C)OC3([H])CC(C)(C)C1([H])O2	PMID: 15104485	Pubmed	Collected by the present study	Neg	Neg	Neg
56	Eritadenine	NC1=NC=NC2=C1N=CN2CC(O)C(O)C(O)=O	1003-3734(2016)23-2647-06	CNKI	Collected by the present study	Neg	Neg	Pos
57	Rubiadin	CC1=C(O)C=C2C(=O)C3=CC=CC=C3C(=O)C2=C1O	PMID: 22136107	Pubmed	Collected by the present study	Neg	Pos	Pos
58	Astragalus Polysaccharide	[O-][N+](=O)C1=CC=C(C=C1)C1=CSC(CCl)=N1	PMID: 27366355	Pubmed	Collected by the present study	Neg	Pos	Pos
59	Pinocembrin	OC1=CC(O)=C2C(=O)CC(OC2=C1)C1=CC=CC=C1	PMID: 27570425	Pubmed	Collected by the present study	Neg	Neg	Pos
60	Hedyotiscone A	COC1=CC2=C(OC(=O)C=C2)C2=C1OC(C2)C(C)=C	PMID: 26828466	Pubmed	Collected by the present study	Neg	Pos	Pos
61	Curcumenolactones C	CC(=O)CCC1C2CC3=C(C)C(=O)OC3(O)CC12C	PMID: 11354673	Pubmed	Collected by the present study	Neg	Pos	Neg
62	Sophoranol	OC12CCCN3CCCC(C4CCCC(=O)N4C1)C23	PMID: 24423652	Pubmed	Collected by the present study	Neg	Pos	Neg
63	Honokiol	OC1=C(CC=C)C=C(C=C1)C1=C(O)C=CC(CC=C)=C1	PMID: 26828466	Pubmed	Collected by the present study	Neg	Pos	Pos
64	Galangin	OC1=CC(O)=C2C(OC(=C(O)C2=O)C2=CC=CC=C2)=C1	PMID: 26828466	Pubmed	Collected by the present study	Neg	Neg	Pos
65	Arbutin	OCC1OC(OC2=CC=C(O)C=C2)C(O)C(O)C1O	PMID: 15330497	Pubmed	Collected by the present study	Neg	Neg	Neg
66	Piperlonguminine	CC(C)CNC(=O)C=CC=CC1=CC2=C(OCO2)C=C1	DOI: 10.3969/j.issn.1005-5304.2016.07.011	CNKI	Collected by the present study	Neg	Pos	Pos
67	Sarmentosins	OCC1OC(OCC=C(CO)C#N)C(O)C(O)C1O	PMID: 22136107	Pubmed	Collected by the present study	Neg	Pos	Neg
68	Tanshinone I	CC1=COC2=C1C(=O)C(=O)C1=C2C=CC2=C1C=CC=C2C	PMID: 26828466	Pubmed	Collected by the present study	Neg	Pos	Pos
69	Dihydrotanshinone	CC1COC2=C1C(=O)C(=O)C1=C2C=CC2=C1C=CC=C2C	PMID: 26828466	Pubmed	Collected by the present study	Neg	Neg	Pos
70	Oroxylin A	COC1=C(O)C=C2OC(=CC(=O)C2=C1O)C1=CC=CC=C1	PMID: 26828466	Pubmed	Collected by the present study	Neg	Pos	Pos
71	Kaempferol	OC1=CC=C(C=C1)C1=C(O)C(=O)C2=C(O)C=C(O)C=C2O1	PMID: 26828466	Pubmed	Collected by the present study	Neg	Pos	Pos
72	Eriodictyol	OC1=CC(O)=C2C(=O)CC(OC2=C1)C1=CC(O)=C(O)C=C1	PMID: 28486192	Pubmed	Collected by the present study	Neg	Neg	Neg
73	Fustin	OC1C(OC2=C(C=CC(O)=C2)C1=O)C1=CC(O)=C(O)C=C1	1006-2084(2012)24-4228-04	CNKI	Collected by the present study	Neg	Neg	Pos
74	Shikonin	CC(C)=CCC(O)C1=CC(=O)C2=C(O)C=CC(O)=C2C1=O	PMID: 26828466	Pubmed	Collected by the present study	Neg	Neg	Pos
75	Catechin，Epicatechin	OC1CC2=C(O)C=C(O)C=C2OC1C1=CC(O)=C(O)C=C1	PMID: 22136107, PMID: 29616383	Pubmed	Collected by the present study	Neg	Neg	Neg
76	Tanshinone Iia	CC1=COC2=C1C(=O)C(=O)C1=C2C=CC2=C1CCCC2(C)C	PMID: 26828466	Pubmed	Collected by the present study	Neg	Pos	Pos
77	Aplysin	CC1CCC2(C)C3=CC(Br)=C(C)C=C3OC12C	DOI: 10.3969/j.issn.1009-0754.2017.04.032	CNKI	Collected by the present study	Neg	Pos	Neg
78	2',4'-Dihydroxy-6'-Methoxy-3',5'-Dimethylchalcone	COC1=C(C)C(O)=C(C)C(O)=C1C(=O)C=CC1=CC=CC=C1	DOI: 10.3969/j.issn.1001-0025.2016.05.016	CNKI	Collected by the present study	Neg	Pos	Pos
79	Demethylwedelolactone	OC1=CC(O)=C2C3=C(C4=CC(O)=C(O)C=C4O3)C(=O)OC2=C1	PMID: 22136107	Pubmed	Collected by the present study	Neg	Neg	Pos
80	Diosmetin	COC1=C(O)C=C(C=C1)C1=CC(=O)C2=C(O)C=C(O)C=C2O1	PMID: 23524937	Pubmed	Collected by the present study	Neg	Pos	Pos
81	Tectorigenin	COC1=C(O)C=C2OC=C(C(=O)C2=C1O)C1=CC=C(O)C=C1	PMID: 23524937	Pubmed	Collected by the present study	Neg	Pos	Pos
82	Hispidulin	COC1=C(O)C=C2OC(=CC(=O)C2=C1O)C1=CC=C(O)C=C1	DOI: 10.3969/j.issn.1001-1528.2017.01.031	CNKI	Collected by the present study	Neg	Pos	Pos
83	Chrysoeriol	COC1=C(O)C=CC(=C1)C1=CC(=O)C2=C(O)C=C(O)C=C2O1	PMID: 17490493	Pubmed	Collected by the present study	Neg	Pos	Pos
84	Kaempferide	COC1=CC=C(C=C1)C1=C(O)C(=O)C2=C(O)C=C(O)C=C2O1	PMID: 30257348	Pubmed	Collected by the present study	Neg	Neg	Pos
85	Salidroside	OCC1OC(OCCC2=CC=C(O)C=C2)C(O)C(O)C1O	DOI: 10.15991/j.cnki.41-1361/r.2011.04.006	CNKI	Collected by the present study	Neg	Neg	Neg
86	Ellagic Acid	OC1=C(O)C2=C3C(=C1)C(=O)OC1=C3C(=CC(O)=C1O)C(=O)O2	PMID: 22136107	Pubmed	Collected by the present study	Neg	Neg	Pos
87	Quercetin	OC1=CC(O)=C2C(OC(=C(O)C2=O)C2=CC(O)=C(O)C=C2)=C1	PMID: 26828466	Pubmed	Collected by the present study	Neg	Neg	Pos
88	Morin	OC1=CC(O)=C(C=C1)C1=C(O)C(=O)C2=C(O)C=C(O)C=C2O1	PMID: 18756351	Pubmed	Collected by the present study	Neg	Neg	Pos
89	Pekinenal	[H]C12CCC(C)=CCCC(C)=CCC(O)C(C=O)=CC1([H])C2(C)C	DOI: 10.3969/j.issn.1001-0025.2016.05.016	CNKI	Collected by the present study	Neg	Neg	Pos
90	Acanthoic Acid	CC1(CC=C2C(CCC3C(C)(CCCC23C)C(O)=O)C1)C=C	PMID: 29710478	Pubmed	Collected by the present study	Neg	Pos	Pos
91	Abietic Acid	CC(C)C1=CC2=CCC3C(C)(CCCC3(C)C(O)=O)C2CC1	PMID: 27365991	Pubmed	Collected by the present study	Neg	Pos	Pos
92	Methyl Brevifolincarboxylate	COC(=O)C1CC(=O)C2=C1C1=C(O)C(O)=C(O)C=C1C(=O)O2	1008-049X(2018)07-1258-05	CNKI	Collected by the present study	Neg	Pos	Pos
93	(+)-Gallocatechin，Epigallocatechin	OC1CC2=C(O)C=C(O)C=C2OC1C1=CC(O)=C(O)C(O)=C1	PMID: 17490493, DOI: 10.3969/j.issn.1001-1528.2017.01.031	Pubmed, CNKI	Collected by the present study	Neg	Neg	Neg
94	Pelargonidin	OC1=CC=C(C=C1)C1=C(O)C=C2C(O)=CC(O)=CC2=[O+]1	PMID: 29710478	Pubmed	Collected by the present study	Neg	Neg	Pos
95	Rutacridone	CN1C2=CC=CC=C2C(=O)C2=C(O)C=C3OC(CC3=C12)C(C)=C	PMID: 17490493	Pubmed	Collected by the present study	Neg	Pos	Pos
96	Noracronycine	CN1C2=CC=CC=C2C(=O)C2=C(O)C=C3OC(C)(C)C=CC3=C12	PMID: 17490493	Pubmed	Collected by the present study	Neg	Pos	Pos
97	Menisdaurin	OCC1OC(OC2CC(O)C=CC2=CC#N)C(O)C(O)C1O	PMID: 27350107	Pubmed	Collected by the present study	Neg	Pos	Pos
98	N-Trans-Feruloyltyramine	COC1=C(O)C=CC(C=CC(=O)NCCC2=CC=C(O)C=C2)=C1	DOI: 10.15991/j.cnki.41-1361/r.2011.04.006	CNKI	Collected by the present study	Neg	Neg	Pos
99	Camphorataimide B	CC(C)CC1=C(C(=O)NC1=O)C1=CC=C(OCC=C(C)C)C=C1	PMID: 19061947	Pubmed	Collected by the present study	Neg	Pos	Pos
100	Cannabidiol	CCCCCC1=CC(O)=C(C2C=C(C)CCC2C(C)=C)C(O)=C1	PMID: 28070230	Pubmed	Collected by the present study	Neg	Pos	Neg
101	3′-O-Methyl Taxifolin	COC1=CC(=CC=C1O)C1OC2=CC(O)=CC(O)=C2C(=O)C1O	PMID: 28486192	Pubmed	Collected by the present study	Neg	Neg	Pos
102	Crepidatin	COC1=CC(CCC2=CC(OC)=C(O)C=C2)=CC(OC)=C1OC	DOI: 10.13863/j.issn1001-4454.2010.09.047	CNKI	Collected by the present study	Neg	Neg	Pos
103	Ethyl Brevifolincarboxylate	CCOC(=O)C1CC(=O)C2=C1C1=C(O)C(O)=C(O)C=C1C(=O)O2	DOI: 10.13286/j.cnki.chinhosppharmacyj.2017.04.05	CNKI	Collected by the present study	Neg	Pos	Pos
104	Demethyleneberberine	COC1=C(OC)C2=C[N+]3=C(C=C2C=C1)C1=CC(O)=C(O)C=C1CC3	PMID: 28290706	Pubmed	Collected by the present study	Neg	Pos	Pos
105	Isobavachalcone	CC(C)=CCC1=C(O)C=CC(C(=O)C=CC2=CC=C(O)C=C2)=C1O	DOI: 10.3969/j.issn.1672-2779.2018.13.065	CNKI	Collected by the present study	Neg	Pos	Pos
106	Glabridin	CC1(C)OC2=C(C=C1)C1=C(CC(CO1)C1=C(O)C=C(O)C=C1)C=C2	DOI: 10.15932/j.0253-9713.2016.9.026	CNKI	Collected by the present study	Neg	Pos	Pos
107	Boldine	COC1=C(O)C=C2CC3N(C)CCC4=CC(O)=C(OC)C(C2=C1)=C34	PMID: 27041876	Pubmed	Collected by the present study	Neg	Neg	Neg
108	Bergenin	COC1=C(O)C=C2C(=O)OC3C(O)C(O)C(CO)OC3C2=C1O	PMID: 26119956	Pubmed	Collected by the present study	Neg	Pos	Pos
109	Crocetin	CC(C=CC=C(C)C(O)=O)=CC=CC=C(C)C=CC=C(C)C(O)=O	PMID: 26858648	Pubmed	Collected by the present study	Neg	Neg	Pos
110	5-Hydroxy-7-(4″-Hydroxy-3″-Methoxyphenyl)-1-Phenyl-3-Heptanone	COC1=CC(CCC(O)CC(=O)CCC2=CC=CC=C2)=CC=C1O	PMID: 30257345	Pubmed	Collected by the present study	Neg	Neg	Neg
111	Sinomenine	COC1=CC2C3CC4=C(C(O)=C(OC)C=C4)C2(CCN3C)CC1=O	DOI: 10.3969/j.issn.1001-5639.2010.03.036	CNKI	Collected by the present study	Neg	Neg	Neg
112	Tinosporone	CC12CCC3C(=O)OC(CC3(C)C1C(=O)C=CC2O)C1=COC=C1	PMID: 21595500	Pubmed	Collected by the present study	Neg	Pos	Pos
113	Chrysotobibenzyl	COC1=CC(CCC2=CC(OC)=C(OC)C=C2)=CC(OC)=C1OC	DOI: 10.13863/j.issn1001-4454.2010.09.047	CNKI	Collected by the present study	Neg	Neg	Pos
114	Glaucocalyxin A	CC1(C)C2CC(O)C34C(O)C(CCC3C2(C)CCC1=O)C(=C)C4=O	PMID: 26156416	Pubmed	Collected by the present study	Neg	Pos	Neg
115	Carnosic Acid	CC(C)C1=C(O)C(O)=C2C(CCC3C(C)(C)CCCC23C(O)=O)=C1	PMID: 23682780	Pubmed	Collected by the present study	Neg	Pos	Pos
116	Cappariloside A	OCC1OC(OC2=CC=CC3=C2C(CC#N)=CN3)C(O)C(O)C1O	PMID: 29953177	Pubmed	Collected by the present study	Neg	Pos	Pos
117	5-O-(E)-P-Coumaroylquinic Acid	[H]OC(=O)C1(O)CC(O)C(O)C(C1)OC(=O)C=CC1=CC=C(O)C=C1	PMID: 26333346	Pubmed	Collected by the present study	Neg	Pos	Pos
118	Columbamine	COC1=C(O)C=C2C(CC[N+]3=C2C=C2C=CC(OC)=C(OC)C2=C3)=C1	PMID: 29710478	Pubmed	Collected by the present study	Neg	Pos	Pos
119	Kopsinine	COC(=O)C1CC23CCCN4CCC5(C24)C2=CC=CC=C2NC15CC3	PMID: 17490493	Pubmed	Collected by the present study	Neg	Pos	Neg
120	Corydine	COC1=C(O)C2=C3C(CC4=C2C(OC)=C(OC)C=C4)N(C)CCC3=C1	-	CNKI	Collected by the present study	Neg	Pos	Neg
121	N-Trans-Feruloyl-3-Methyldopamine	COC1=C(O)C=CC(C=CC(=O)N(C)CCC2=CC(O)=C(O)C=C2)=C1	DOI: 10.15991/j.cnki.41-1361/r.2011.04.006	CNKI	Collected by the present study	Neg	Neg	Pos
122	Cynaropicrin	OCC(=C)C(=O)OC1CC(=C)C2CC(O)C(=C)C2C2OC(=O)C(=C)C12	PMID: 27350107	Pubmed	Collected by the present study	Neg	Pos	Neg
123	Helioxanthin	O=C1OCC2=C1C=C1C=CC3=C(OCO3)C1=C2C1=CC2=C(OCO2)C=C1	1001-5256(2012)11-0872-05	CNKI	Collected by the present study	Neg	Pos	Pos
124	Leonuride	CC1(O)CC(O)C2C=COC(OC3OC(CO)C(O)C(O)C3O)C12	PMID: 17490493	Pubmed	Collected by the present study	Neg	Neg	Neg
125	Gardenia Yellow Pigment	OS(=O)(=O)C1=CC2=C(C=C1)C(=NNC1=CC=CC=C1)C(=O)C=C2	1006-3250(2010)11-1084-03	CNKI	Collected by the present study	Neg	Pos	Pos
126	Dehydrocavidine	COC1=C(OC)C=C2C3C(C)C4=C(CN3C=CC2=C1)C1=C(OCO1)C=C4	PMID: 21595500	Pubmed	Collected by the present study	Neg	Pos	Pos
127	Diaboline	CC(=O)N1C2C3C4CC5N(CCC25C2=CC=CC=C12)CC4=CCOC3O	PMID: 21595500	Pubmed	Collected by the present study	Neg	Pos	Pos
128	Sesamin	C1OC2=C(O1)C=C(C=C2)C1OCC2C1COC2C1=CC2=C(OCO2)C=C1	PMID: 21595500	Pubmed	Collected by the present study	Neg	Neg	Neg
129	Neochebulic Acid，Chebulic Acid	[H]C(CC(O)=O)(C(O)=O)C1([H])C2=C(C=C(O)C(O)=C2O)C(=O)OC1([H])C(O)=O	PMID: 23620847	Pubmed	Collected by the present study	Neg	Neg	Pos
130	Gentiopicroside	OCC1OC(OC2OC=C3C(=O)OCC=C3C2C=C)C(O)C(O)C1O	PMID: 27570425	Pubmed	Collected by the present study	Neg	Neg	Pos
131	Sauchinone	CC1CC2C3C(C1C)C1=CC4=C(OCO4)C=C1OC31OCOC1=CC2=O	PMID: 21595500	Pubmed	Collected by the present study	Neg	Pos	Pos
132	Saucerneol G	CC(CC1=CC2=C(OCO2)C=C1O)C(C)C(=O)C1=CC2=C(OCO2)C=C1	PMID: 27366355	Pubmed	Collected by the present study	Neg	Neg	Neg
133	Coniferyl Ferulate	COC1=C(O)C=CC(C=CCOC(=O)C=CC2=CC(OC)=C(O)C=C2)=C1	-	CNKI	Collected by the present study	Neg	Neg	Pos
134	Conessine	CC1C2CCC3C4CC=C5CC(CCC5(C)C4CCC23CN1C)N(C)C	PMID: 22136107	Pubmed	Collected by the present study	Neg	Neg	Neg
135	Sweroside	OCC1OC(OC2OC=C3C(CCOC3=O)C2C=C)C(O)C(O)C1O	DOI: 10.3969/j.issn.1005-0264.2014.04.023	CNKI	Collected by the present study	Neg	Neg	Pos
136	Pinoresinol	COC1=C(O)C=CC(=C1)C1OCC2C1COC2C1=CC(OC)=C(O)C=C1	PMID: 21595500	Pubmed	Collected by the present study	Neg	Neg	Neg
137	Rosmarinic Acid	OC(=O)C(CC1=CC(O)=C(O)C=C1)OC(=O)C=CC1=CC(O)=C(O)C=C1	PMID: 29710478	Pubmed	Collected by the present study	Neg	Neg	Pos
138	Monomelittoside	OCC1OC(OC2OC=CC3(O)C(O)C=C(CO)C23)C(O)C(O)C1O	PMID: 17490493	Pubmed	Collected by the present study	Neg	Neg	Pos
139	Catalpol	OCC1OC(OC2OC=CC3C(O)C4OC4(CO)C23)C(O)C(O)C1O	PMID: 17490493	Pubmed	Collected by the present study	Neg	Neg	Pos
140	Ponicidin	CC1(C)CCC(O)C23C4OC5C6CCC2C5(C(=O)C6=C)C(O)(O4)C(O)C13	PMID: 26828466	Pubmed	Collected by the present study	Neg	Neg	Neg
141	Nodosin	CC1(C)CCC2OC(=O)C34CC(CC(O)C3C22COC(O)C12)C(=C)C4=O	DOI: 10.3969/j.issn.1009-5519.2015.01.023	CNKI	Collected by the present study	Neg	Neg	Neg
142	7-O-Galloyl-D-Sedoheptulose	[2H]C1=C(C=C(O)C(O)=C1O)C(=O)OCC(O)C(O)C(O)C(O)C(=O)CO	PMID: 29983732	Pubmed	Collected by the present study	Neg	Neg	Neg
143	Hydroxycamptothecin	CCC1(O)C(=O)OCC2=C1C=C1N(CC3=C1N=C1C=CC(O)=CC1=C3)C2=O	PMID: 26006028	Pubmed	Collected by the present study	Neg	Pos	Pos
144	Corynoline	CN1CC2=C(C=CC3=C2OCO3)C2(C)C(O)CC3=CC4=C(OCO4)C=C3C12	PMID: 17490493	Pubmed	Collected by the present study	Neg	Pos	Neg
145	Icaritin	COC1=CC=C(C=C1)C1=C(O)C(=O)C2=C(O1)C(CC=C(C)C)=C(O)C=C2O	PMID: 26828466	Pubmed	Collected by the present study	Neg	Neg	Pos
146	Kaerophyllin	COC1=C(OC)C=C(C=C2C(CC3=CC4=C(OCO4)C=C3)COC2=O)C=C1	PMID: 26941826	Pubmed	Collected by the present study	Neg	Neg	Pos
147	Vitexin 1 (Vb-1)	[H]C1(C(CO)C(=CC2=CC(OC)=C(O)C=C12)C(C)=O)C1=CC=C(O)C(OC)=C1	DOI: 10.3969/j.issn.1001-0025.2016.05.016	CNKI	Collected by the present study	Neg	Neg	Pos
148	Phillygenin	COC1=C(OC)C=C(C=C1)C1OCC2C1COC2C1=CC(OC)=C(O)C=C1	1008-049X(2017)09-1638-05	CNKI	Collected by the present study	Neg	Neg	Neg
149	Arctigenin	COC1=C(OC)C=C(CC2COC(=O)C2CC2=CC(OC)=C(O)C=C2)C=C1	PMID: 29579707	Pubmed	Collected by the present study	Neg	Neg	Neg
150	Tetrahydrocurcumin	COC1=CC(CCC(=O)CC(=O)CCC2=CC=C(O)C(OC)=C2)=CC=C1O	DOI: 10.3969/j.issn.1003-9783.2016.03.028	CNKI	Collected by the present study	Neg	Neg	Neg
151	Swertiamarin	OCC1OC(OC2OC=C3C(=O)OCCC3(O)C2C=C)C(O)C(O)C1O	PMID: 28911662	Pubmed	Collected by the present study	Neg	Pos	Pos
152	Casticin	COC1=C(O)C=C(C=C1)C1=C(OC)C(=O)C2=C(O)C(OC)=C(OC)C=C2O1	DOI: 10.13313/j.issn.1673-4890.2017.1.029	CNKI	Collected by the present study	Neg	Neg	Pos
153	Ternatin	COC1=C(O)C=CC(=C1)C1=C(OC)C(=O)C2=C(O1)C(OC)=C(OC)C=C2O	PMID: 27041876	Pubmed	Collected by the present study	Neg	Neg	Pos
154	Skullcapflavone Ii	COC1=CC=CC(O)=C1C1=CC(=O)C2=C(O1)C(OC)=C(OC)C(OC)=C2O	PMID: 29616383	Pubmed	Collected by the present study	Neg	Neg	Pos
155	Anastatin B	OC1=CC=C(C=C1)C1CC(=O)C2=C(O)C=C3OC4=CC(O)=C(O)C=C4C3=C2O1	PMID: 28486192	Pubmed	Collected by the present study	Neg	Neg	Pos
156	Schisandrin C	COC1=C2C(CC(C)C(C)CC3=CC4=C(OCO4)C(OC)=C23)=CC2=C1OCO2	DOI: 10.13457/j.cnki.jncm.2009.07.003	CNKI	Collected by the present study	Neg	Pos	Pos
157	Praeruptorin A	CC=C(C)C(=O)OC1C(OC(C)=O)C2=C(OC1(C)C)C=CC1=C2OC(=O)C=C1	-	CNKI	Collected by the present study	Neg	Pos	Pos
158	Bufalin	CC12CCC3C(CCC4CC(O)CCC34C)C1(O)CCC2C1=COC(=O)C=C1	PMID: 26828466	Pubmed	Collected by the present study	Neg	Neg	Neg
159	Ursodeoxycholic Acid	CC(CCC(O)=O)C1CCC2C3C(O)CC4CC(O)CCC4(C)C3CCC12C	DOI: 10.13192/j.issn.1000-1719.2018.04.066	CNKI	Collected by the present study	Neg	Pos	Neg
160	Trimethyl Esterdehydrochebulic Acid	COC(=O)C=C(C1C(OC(=O)C2=C1C(O)=C(O)C(O)=C2)C(=O)OC)C(=O)OC	1008-049X(2018)07-1258-05	CNKI	Collected by the present study	Neg	Pos	Pos
161	Ergosterol	CC(C)C(C)C=CC(C)C1CCC2C3=CC=C4CC(O)CCC4(C)C3CCC12C	PMID: 25386220	Pubmed	Collected by the present study	Neg	Neg	Neg
162	Schisanhenol	COC1=C(OC)C(O)=C2C(CC(C)C(C)CC3=CC(OC)=C(OC)C(OC)=C23)=C1	PMID: 23265871	Pubmed	Collected by the present study	Neg	Pos	Neg
163	Gardenoside	COC(=O)C1=COC(OC2OC(CO)C(O)C(O)C2O)C2C1C=CC2(O)CO	PMID: 29616383	Pubmed	Collected by the present study	Neg	Neg	Pos
164	5-O-Methyl-(E)-Resveratrol 3-O-Beta-D-Glucopyranoside	COC1=CC(C=CC2=CC=C(O)C=C2)=CC(OC2OC(CO)C(O)C(O)C2O)=C1	DOI: 10.15991/j.cnki.41-1361/r.2011.04.006	CNKI	Collected by the present study	Neg	Neg	Neg
165	Stigmasterol	CCC(C=CC(C)C1CCC2C3CC=C4CC(O)CCC4(C)C3CCC12C)C(C)C	PMID: 29309862	Pubmed	Collected by the present study	Neg	Neg	Neg
166	Halofuginone	OC1CCCNC1CC(=O)CN1C=NC2=CC(Br)=C(Cl)C=C2C1=O	PMID: 24358159	Pubmed	Collected by the present study	Neg	Pos	Pos
167	γ-Sitosterol，β-Sitosterol	CCC(CCC(C)C1CCC2C3CC=C4CC(O)CCC4(C)C3CCC12C)C(C)C	PMID: 29953177, PMID: 22136107	Pubmed	Collected by the present study	Neg	Neg	Neg
168	Daidzin	OCC1OC(OC2=CC3=C(C=C2)C(=O)C(=CO3)C2=CC=C(O)C=C2)C(O)C(O)C1O	-	CNKI	Collected by the present study	Neg	Neg	Pos
169	Chrysophanol 8-O-β-Dglucoside	CC1=CC(O)=C2C(=O)C3=C(C=CC=C3OC3OC(CO)C(O)C(O)C3O)C(=O)C2=C1	PMID: 29616383	Pubmed	Collected by the present study	Neg	Neg	Pos
170	Arenobufagin	CC12C(CCC1(O)C1CCC3CC(O)CCC3(C)C1C(O)C2=O)C1=COC(=O)C=C1	PMID: 26828466	Pubmed	Collected by the present study	Neg	Neg	Neg
171	Phyltetralin	COCC1CC2=CC(OC)=C(OC)C=C2C(C1COC)C1=CC(OC)=C(OC)C=C1	PMID: 22136107	Pubmed	Collected by the present study	Neg	Neg	Neg
172	Liquiritin	OCC1OC(OC2=CC=C(C=C2)C2CC(=O)C3=C(O2)C=C(O)C=C3)C(O)C(O)C1O	DOI：10.13412/j.cnki.zyyl.2017.01.065	CNKI	Collected by the present study	Neg	Neg	Neg
173	Barbaloin	OCC1OC(C(O)C(O)C1O)C1C2=CC(CO)=CC(O)=C2C(=O)C2=C1C=CC=C2O	PMID: 22136107	Pubmed	Collected by the present study	Neg	Neg	Pos
174	Gomisin S	COC1=C(OC)C(OC)=C2C(=C1)C(O)C(C)C(C)CC1=CC(O)=C(OC)C(OC)=C21	PMID: 23265871	Pubmed	Collected by the present study	Neg	Neg	Neg
175	2,3,5,4'-Tetrahydroxystilbene-2-O-β-D-Glucoside	CC1(O)C(CO)OC(OC2=C(O)C=C(O)C=C2C=CC2=CC=C(O)C=C2)C(O)C1O	PMID: 27872651	Pubmed	Collected by the present study	Neg	Neg	Pos
176	Glucoerucin	CSCCCCC(SC1OC(CO)C(O)C(O)C1O)=NOS(O)(=O)=O	PMID: 21595500	Pubmed	Collected by the present study	Neg	Neg	Pos
177	Glutenol	[H]C12CCC(O)C(C)(C)C1=CCC1([H])C2(C)CCC2(C)C3([H])CC(C)(C)CCC3(C)CCC12C	PMID: 29953177	Pubmed	Collected by the present study	Neg	Neg	Pos
178	β-Amyrin	CC1(C)CCC2(C)CCC3(C)C(=CCC4C5(C)CCC(O)C(C)(C)C5CCC34C)C2C1	PMID: 21595500	Pubmed	Collected by the present study	Neg	Neg	Pos
179	Alpha-Amyrin	CC1CCC2(C)CCC3(C)C(=CCC4C5(C)CCC(O)C(C)(C)C5CCC34C)C2C1C	PMID: 21595500	Pubmed	Collected by the present study	Neg	Neg	Pos
180	Taraxerol	CC1(C)CCC2(C)CC=C3C4(C)CCC5C(C)(C)C(O)CCC5(C)C4CCC3(C)C2C1	PMID: 29953177	Pubmed	Collected by the present study	Neg	Neg	Pos
181	Peimisine	CC1C2NCC(C)CC2OC11CCC2C3CC(=O)C4CC(O)CCC4(C)C3CC2=C1C	1000-7156(2014)05-0057-03	CNKI	Collected by the present study	Neg	Neg	Neg
182	Praeruptorin E	CC=C(C)C(=O)OC1C(OC(=O)CC(C)C)C2=C(OC1(C)C)C=CC1=C2OC(=O)C=C1	-	CNKI	Collected by the present study	Neg	Neg	Pos
183	3Beta-Hydroxyporiferast-5-En-7-One	CCC(CCC(C)C1CCC2C3C(CCC12C)C1(C)CCC(O)CC1=CC3=O)C(C)C	DOI: 10.15991/j.cnki.41-1361/r.2011.04.006	CNKI	Collected by the present study	Neg	Neg	Pos
184	Hypophyllanthin	COCC1CC2=CC(OC)=C3OCOC3=C2C(C1COC)C1=CC(OC)=C(OC)C=C1	PMID: 22136107	Pubmed	Collected by the present study	Neg	Neg	Neg
185	Nirtetralin	COCC1CC2=CC3=C(OCO3)C(OC)=C2C(C1COC)C1=CC(OC)=C(OC)C=C1	PMID: 22136107	Pubmed	Collected by the present study	Neg	Neg	Neg
186	Vitamin E	CC(C)CCCC(C)CCCC(C)CCCC1(C)CCC2=C(C)C(O)=C(C)C(C)=C2O1	PMID: 25242845	Pubmed	Collected by the present study	Neg	Neg	Neg
187	Apigenin-7-Glucoside	OCC1OC(OC2=CC(O)=C3C(=O)C=C(OC3=C2)C2=CC=C(O)C=C2)C(O)C(O)C1O	PMID: 28735729	Pubmed	Collected by the present study	Neg	Neg	Pos
188	Baicalein 7-O-Glucoside	OCC1OC(OC2=C(O)C(O)=C3C(=O)C=C(OC3=C2)C2=CC=CC=C2)C(O)C(O)C1O	PMID: 29616383	Pubmed	Collected by the present study	Neg	Neg	Pos
189	Pseudolaric Acid B	COC(=O)C1=CCC23CCC(C2(CC1)OC(C)=O)C(C)(OC3=O)C=CC=C(C)C(O)=O	PMID: 26828466	Pubmed	Collected by the present study	Neg	Pos	Pos
190	Schischinone	COC1=C(OC)C(OC)=C(C(CO)=C1)C1=C(OC)C2=C(OCO2)C=C1CC(C)C(C)=O	PMID: 27366355	Pubmed	Collected by the present study	Neg	Neg	Neg
191	Swertianolin	[H]C1(CO)OC([H])(OC2=CC=C(O)C3=C2C(=O)C2=C(O)C=C(OC)C=C2O3)C(O)C(O)C1O	DOI: 10.3969/j.issn.1001-1528.2017.06.016	CNKI	Collected by the present study	Neg	Neg	Neg
192	Phlorizin	OCC1OC(OC2=CC(O)=CC(O)=C2C(=O)CCC2=CC=C(O)C=C2)C(O)C(O)C1O	DOI: 10.15991/j.cnki.41-1361/r.2011.04.006	CNKI	Collected by the present study	Neg	Neg	Neg
193	Catechin Gallate，Epicatechin Gallate	OC1=CC(O)=C2CC(OC(=O)C3=CC(O)=C(O)C(O)=C3)C(OC2=C1)C1=CC(O)=C(O)C=C1	DOI: 10.13194/j.issn.1673-842x.2013.12.018, PMID: 26828466	CNKI, Pubmed	Collected by the present study	Neg	Pos	Pos
194	Cinobufagin	CC(=O)OC1C2OC22C3CCC4CC(O)CCC4(C)C3CCC2(C)C1C1=COC(=O)C=C1	PMID: 26828466	Pubmed	Collected by the present study	Neg	Neg	Neg
195	5,2’-Dihydroxy-7-O-β-D-Glucuronylflavone	OC1C(O)C(OC2=CC3=C(C(O)=C2)C(=O)C=C(O3)C2=CC=CC=C2O)OC(C1O)C(O)=O	PMID: 26333346	Pubmed	Collected by the present study	Neg	Neg	Pos
196	Kaempferol-3-O-α-Lrhamnopyranoside	[H]C1(OOC2=C(OC3=CC(O)=CC(O)=C3C2=O)C2=CC=C(O)C=C2)OC(C)C(O)C(O)C1O	PMID: 26119956	Pubmed	Collected by the present study	Neg	Neg	Pos
197	Quercitrin	CC1OC(OC2=C(OC3=CC(O)=CC(O)=C3C2=O)C2=CC(O)=C(O)C=C2)C(O)C(O)C1O	PMID: 22136107	Pubmed	Collected by the present study	Neg	Neg	Pos
198	Quercetin-7-O-α-L-rhamnoside	CC1OC(OC2=CC(O)=C3C(=O)C(O)=C(OC3=C2)C2=CC(O)=C(O)C=C2)C(O)C(O)C1O	PMID: 25061723	Pubmed	Collected by the present study	Neg	Neg	Pos
199	Isoorientin	OCC1OC(C(O)C(O)C1O)C1=C(O)C=C2OC(=CC(=O)C2=C1O)C1=CC(O)=C(O)C=C1	PMID: 26333346	Pubmed	Collected by the present study	Neg	Neg	Pos
200	Luteoloside	OCC1OC(OC2=CC(O)=C3C(=O)C=C(OC3=C2)C2=CC(O)=C(O)C=C2)C(O)C(O)C1O	PMID: 26941826	Pubmed	Collected by the present study	Neg	Neg	Pos
201	Astragalin	OCC1OC(OC2=C(OC3=CC(O)=CC(O)=C3C2=O)C2=CC=C(O)C=C2)C(O)C(O)C1O	PMID: 21595500	Pubmed	Collected by the present study	Neg	Neg	Pos
202	7-hydroxy-3-(4-methoxy-3-{[3,4,5-trihydroxy-6-(hydroxymethyl)oxan-2-yl]oxy}phenyl)-2,3-dihydro-1-benzopyran-4-one	[H]C1(CO)OC(OC2=C(OC)C=CC(=C2)C2COC3=CC(O)=CC=C3C2=O)C(O)C(O)C1O	-	CNKI	Collected by the present study	Neg	Neg	Neg
203	Cyanidin-3-Glucoside	OCC1OC(OC2=C([O+]=C3C=C(O)C=C(O)C3=C2)C2=CC(O)=C(O)C=C2)C(O)C(O)C1O	PMID: 27570425	Pubmed	Collected by the present study	Neg	Neg	Pos
204	2'-Methoxykurarinone	COC1=CC(O)=C(CC(CC=C(C)C)C(C)=C)C2=C1C(=O)CC(O2)C1=C(OC)C=C(O)C=C1	PMID: 26006028	Pubmed	Collected by the present study	Neg	Pos	Pos
205	Anticin A	CC(CCC(=C)C(C)C(O)=O)C1CCC2C3=C(C(=O)CC12C)C1(C)CCC(=O)C(C)C1CC3	PMID: 24716143	Pubmed	Collected by the present study	Neg	Neg	Pos
206	Betunolic Acid	CC(=C)C1CCC2(CCC3(C)C(CCC4C5(C)CCC(=O)C(C)(C)C5CCC34C)C12)C(O)=O	1003-3734(2016)23-2647-06	CNKI	Collected by the present study	Neg	Neg	Pos
207	Ursolic Acid	CC1CCC2(CCC3(C)C(=CCC4C5(C)CCC(O)C(C)(C)C5CCC34C)C2C1C)C(O)=O	PMID: 22136107	Pubmed	Collected by the present study	Neg	Neg	Pos
208	Oleanolic Acid	CC1(C)CCC2(CCC3(C)C(=CCC4C5(C)CCC(O)C(C)(C)C5CCC34C)C2C1)C(O)=O	PMID: 22136107	Pubmed	Collected by the present study	Neg	Neg	Pos
209	Amygdalin	OCC1OC(OCC2OC(OC(C#N)C3=CC=CC=C3)C(O)C(O)C2O)C(O)C(O)C1O	DOI: 10.6039/j.issn.1001-0408.2016.16.18	CNKI	Collected by the present study	Neg	Neg	Pos
210	Wogonin 7-O-Glucuronoside	COC1=C(OC2OC(C(O)C(O)C2O)C(O)=O)C=C(O)C2=C1OC(=CC2=O)C1=CC=CC=C1	PMID: 29616383	Pubmed	Collected by the present study	Neg	Neg	Pos
211	Protopanaxadiol	CC(C)=CCCC(C)(O)C1CCC2(C)C1C(O)CC1C3(C)CCC(O)C(C)(C)C3CCC21C	PMID: 27872651	Pubmed	Collected by the present study	Neg	Neg	Neg
212	Luteolin 7-O-β-D-Glucuronide	OC1C(O)C(OC2=CC(O)=C3C(=O)C=C(OC3=C2)C2=CC(O)=C(O)C=C2)OC(C1O)C(O)=O	PMID: 26333346	Pubmed	Collected by the present study	Neg	Neg	Pos
213	Scutellarin	OC1C(O)C(OC2=C(O)C(O)=C3C(=O)C=C(OC3=C2)C2=CC=C(O)C=C2)OC(C1O)C(O)=O	PMID: 26828466	Pubmed	Collected by the present study	Neg	Neg	Pos
214	Tectoridin	COC1=C(OC2OC(CO)C(O)C(O)C2O)C=C2OC=C(C(=O)C2=C1O)C1=CC=C(O)C=C1	DOI: 10.11724/jdmu.2015.04.01	CNKI	Collected by the present study	Neg	Neg	Pos
215	Homoplantiginin	COC1=C(OC2OC(CO)C(O)C(O)C2O)C=C2OC(=CC(=O)C2=C1O)C1=CC=C(O)C=C1	PMID: 26858648	Pubmed	Collected by the present study	Neg	Neg	Pos
216	Scoparin	COC1=C(O)C=CC(=C1)C1=CC(=O)C2=C(O1)C(C1OC(CO)C(O)C(O)C1O)=C(O)C=C2O	PMID: 21595500	Pubmed	Collected by the present study	Neg	Neg	Pos
217	rhamnocitrin 4'β-D-Galactopyranoside	COC1=CC(O)=C2C(=O)C(O)=C(OC2=C1)C1=CC=C(OC2OC(CO)C(O)C(O)C2O)C=C1	PMID: 29344421	Pubmed	Collected by the present study	Neg	Neg	Pos
218	4-Acetylantroquinonol B	COC1=C(OC)C(=O)C(C)C(CC=C(C)CCC=C(C)CC2CC(C)C(=O)O2)C1OC(C)=O	PMID: 24716143	Pubmed	Collected by the present study	Neg	Pos	Pos
219	Quercetin 5-O-β-D-Glucopyranoside	[H]C1(OC2=C3C(=O)C(O)=C(OC3=CC(O)=C2)C2=CC(O)=C(O)C=C2)OC(CO)C(O)C(O)C1O	PMID: 26333346	Pubmed	Collected by the present study	Neg	Neg	Pos
220	Isoquercetin，Hyperoside	OCC1OC(OC2=C(OC3=CC(O)=CC(O)=C3C2=O)C2=CC(O)=C(O)C=C2)C(O)C(O)C1O	PMID: 22421379, PMID: 22136107	Pubmed	Collected by the present study	Neg	Neg	Pos
221	Garcinone E	CC(C)=CCC1=C(O)C=C2OC3=C(CC=C(C)C)C(O)=C(O)C(CC=C(C)C)=C3C(=O)C2=C1O	PMID: 29953177	Pubmed	Collected by the present study	Neg	Neg	Pos
222	Anticin B	CC(CCC(=C)C(C)C(O)=O)C1CCC2C3=C(C(=O)CC12C)C1(C)CCC(=O)C(C)C1CC3=O	PMID: 24716143	Pubmed	Collected by the present study	Neg	Neg	Pos
223	Methylantcinate A	COC(=O)C(C)C(=C)CCC(C)C1CCC2C3=C(C(=O)CC12C)C1(C)CCC(=O)C(C)C1CC3	PMID: 24716143	Pubmed	Collected by the present study	Neg	Neg	Pos
224	Withaferin A	CC(C1CCC2C3CC4OC44C(O)C=CC(=O)C4(C)C3CCC12C)C1CC(C)=C(CO)C(=O)O1	PMID: 22136107	Pubmed	Collected by the present study	Neg	Neg	Neg
225	Anticin C	CC(CCC(=C)C(C)C(O)=O)C1CCC2C3=C(C(=O)CC12C)C1(C)CCC(=O)C(C)C1CC3O	PMID: 24716143	Pubmed	Collected by the present study	Neg	Neg	Pos
226	Corosolic Acid	CC1CCC2(CCC3(C)C(=CCC4C5(C)CC(O)C(O)C(C)(C)C5CCC34C)C2C1C)C(O)=O	1674-5515(2012)06-0624-05	CNKI	Collected by the present study	Neg	Neg	Pos
227	Chicoric Acid	OC(=O)C(OC(=O)C=CC1=CC(O)=C(O)C=C1)C(OC(=O)C=CC1=CC(O)=C(O)C=C1)C(O)=O	PMID: 28070230	Pubmed	Collected by the present study	Neg	Neg	Pos
228	Camelliagenin A	CC1(C)CC(O)C2(CO)C(O)CC3(C)C(=CCC4C5(C)CCC(O)C(C)(C)C5CCC34C)C2C1	PMID: 17490493	Pubmed	Collected by the present study	Neg	Neg	Neg
229	Kaempferol-6′-O-Acetate	CC(=O)OC1OC(OC2=C(OC3=CC(O)=CC(O)=C3C2=O)C2=CC=C(O)C=C2)C(O)C(O)C1O	PMID: 22421379	Pubmed	Collected by the present study	Neg	Neg	Pos
230	Cirismarin	COC1=C(OC)C(O)=C2C(=O)C=C(OC2=C1)C1=CC=C(OC2OC(CO)C(O)C(O)C2O)C=C1	PMID: 26858648	Pubmed	Collected by the present study	Neg	Neg	Pos
231	Isorhamnetin 3-O-Galactoside	COC1=C(O)C=CC(=C1)C1=C(OC2OC(CO)C(O)C(O)C2O)C(=O)C2=C(O)C=C(O)C=C2O1	DOI: 10.13748/j.cnki.issn1007-7693.2015.09.031	CNKI	Collected by the present study	Neg	Neg	Pos
232	Albiflorin	CC12CC(O)C3CC1(OC1OC(CO)C(O)C(O)C1O)C3(COC(=O)C1=CC=CC=C1)C(=O)O2	PMID: 29616383	Pubmed	Collected by the present study	Neg	Neg	Pos
233	Neoandrographolide	CC1(COC2OC(CO)C(O)C(O)C2O)CCCC2(C)C(CCC3=CCOC3=O)C(=C)CCC12	PMID: 21595500	Pubmed	Collected by the present study	Neg	Neg	Neg
234	Silidianin	COC1=C(O)C=CC(=C1)C1C2COC3(O)C2C(=CC1C3=O)C1OC2=CC(O)=CC(O)=C2C(=O)C1O	PMID: 27366355	Pubmed	Collected by the present study	Neg	Neg	Pos
235	Silychristin	COC1=C(O)C=CC(=C1)C1OC2=C(C=C(C=C2O)C2OC3=CC(O)=CC(O)=C3C(=O)C2O)C1CO	PMID: 29309862	Pubmed	Collected by the present study	Neg	Neg	Neg
236	Methylantcinate B	COC(=O)C(C)C(=C)CCC(C)C1CCC2C3=C(C(=O)CC12C)C1(C)CCC(=O)C(C)C1CC3=O	PMID: 24716143	Pubmed	Collected by the present study	Neg	Neg	Pos
237	Antcin K	CC(CCC(=C)C(C)C(O)=O)C1CCC2C3=C(C(=O)CC12C)C1(C)CCC(O)C(C)(O)C1CC3O	DOI: 10.11569/wcjd.v24.i15.2347	CNKI	Collected by the present study	Neg	Pos	Neg
238	Arjunic Acid	CC1(C)CCC2(CCC3(C)C(=CCC4C5(C)CC(O)C(O)C(C)(C)C5CCC34C)C2C1O)C(O)=O	PMID: 29616383	Pubmed	Collected by the present study	Neg	Neg	Pos
239	Arjunolic Acid	CC1(C)CCC2(CCC3(C)C(=CCC4C5(C)CC(O)C(O)C(C)(CO)C5CCC34C)C2C1)C(O)=O	PMID: 29616383	Pubmed	Collected by the present study	Neg	Neg	Neg
240	Asiatic Acid	CC1CCC2(CCC3(C)C(=CCC4C5(C)CC(O)C(O)C(C)(CO)C5CCC34C)C2C1C)C(O)=O	PMID: 21595500	Pubmed	Collected by the present study	Neg	Neg	Neg
241	Campenoside	CC1C(CC2C1C(OC1OC(CO)C(O)C(O)C1O)OC=C2C=O)OC(=O)C=CC1=CC=CC=C1	PMID: 17490493	Pubmed	Collected by the present study	Neg	Neg	Pos
242	Theasapogenol B	CC1(C)CC2C3=CCC4C5(C)CCC(O)C(C)(C)C5CCC4(C)C3(C)CC(O)C2(CO)C(O)C1O	PMID: 17490493	Pubmed	Collected by the present study	Neg	Neg	Neg
243	Alisol A	CC(CC(O)C(O)C(C)(C)O)C1=C2CC(O)C3C4(C)CCC(=O)C(C)(C)C4CCC3(C)C2(C)CC1	PMID: 27080939	Pubmed	Collected by the present study	Neg	Neg	Neg
244	Isoquercetin-6’-O-Acetate	CC(=O)OC1OC(OC2=C(OC3=CC(O)=CC(O)=C3C2=O)C2=CC=C(O)C(O)=C2)C(O)C(O)C1O	PMID: 22421379	Pubmed	Collected by the present study	Neg	Neg	Pos
245	Picroside I	OCC12OC1C(O)C1C=COC(OC3OC(COC(=O)C=CC4=CC=CC=C4)C(O)C(O)C3O)C21	PMID: 22136107	Pubmed	Collected by the present study	Neg	Neg	Pos
246	Giloin	CC12CC=C3C(=O)OC(CC3(C)C1CC(=O)CC2OC1OC(CO)C(O)C(O)C1O)C1=COC=C1	PMID: 22136107	Pubmed	Collected by the present study	Neg	Neg	Pos
247	Premnone C	COC(=O)CC(=C)C(=O)CC1(C)C(C)C(OC(=O)C=CC2=CC=CC=C2)C(O)C2(C)C1CCC=C2C	PMID: 21595500	Pubmed	Collected by the present study	Neg	Neg	Pos
248	Premnone B,Premnone A	COC(=O)CC(=C)C(=O)CC1(C)C(C)C(O)C(OC(=O)C=CC2=CC=CC=C2)C2(C)C1CCC=C2C	PMID: 21595500	Pubmed	Collected by the present study	Neg	Neg	Pos
249	Negundoside	CC1(O)CCC2C1C(OC1OC(CO)C(O)C(O)C1OC(=O)C1=CC=C(O)C=C1)OC=C2C(O)=O	PMID: 25641408	Pubmed	Collected by the present study	Neg	Neg	Pos
250	Picroliv	COC1=C(OC(=O)C=CC2=CC=CC=C2)C=CC(=C1)C(=O)OC1OC(CO)C(O)C(O)C1O	PMID: 19049667	Pubmed	Collected by the present study	Neg	Neg	Pos
251	2β,30β-Dihydroxy-3,4-Secofriedelolactone-27-Lactone	CC1C2CCC34C5CC(C)(CO)CCC5(C)CC(OC3=O)C4(C)C2CC2(C)C1CC(O)C(=O)OC2C	PMID: 27350107	Pubmed	Collected by the present study	Neg	Neg	Neg
252	Arjungenin	CC1(C)CCC2(CCC3(C)C(=CCC4C5(C)CC(O)C(O)C(C)(CO)C5CCC34C)C2C1O)C(O)=O	PMID: 29616383	Pubmed	Collected by the present study	Neg	Neg	Neg
253	Camelliagenin D,Theasapogenol E	CC1(C)CC2C3=CCC4C5(C)CCC(O)C(C)(C=O)C5CCC4(C)C3(C)CC(O)C2(CO)C(O)C1O	PMID: 17490493	Pubmed	Collected by the present study	Neg	Neg	Neg
254	5-Hydroxy-Campenoside	[H]OC([H])([H])C1([H])OC([H])(OC2([H])OC([H])=C(C([H])=O)C3(O[H])C([H])([H])C([H])(OC(=O)C([H])=C([H])C4=C([H])C([H])=C([H])C([H])=C4[H])C([H])(C([H])([H])[H])C23[H])C([H])(O[H])C([H])(O[H])C1([H])O[H]	PMID: 17490493	Pubmed	Collected by the present study	Neg	Neg	Pos
255	Theasapogenol A	CC1(C)CC2C3=CCC4C5(C)CCC(O)C(C)(CO)C5CCC4(C)C3(C)CC(O)C2(CO)C(O)C1O	PMID: 17490493	Pubmed	Collected by the present study	Neg	Neg	Neg
256	Rehmannioside C	CC1(CC(O)C2C=COC(OC3OC(CO)C(O)C(O)C3O)C12)OC1OC(CO)C(O)C(O)C1O	PMID: 17490493	Pubmed	Collected by the present study	Neg	Neg	Pos
257	Picrosideii	COC1=C(O)C=CC(=C1)C(=O)OC1C2OC2(CO)C2C1C=COC2OC1OC(CO)C(O)C(O)C1O	PMID: 29256835	Pubmed	Collected by the present study	Neg	Neg	Pos
258	Schizantherin B	COC1=C(OC)C(OC)=C2C3C(C=C4OCOC4=C3OC)=CC(C)C(C)(O)C(OC(=O)C(C)=CC)C2=C1	DOI: 10.13457/j.cnki.jncm.2009.07.003	CNKI	Collected by the present study	Neg	Neg	Pos
259	Alisol B 23-Acetate	CC(CC(OC(C)=O)C1OC1(C)C)C1=C2CC(O)C3C4(C)CCC(=O)C(C)(C)C4CCC3(C)C2(C)CC1	PMID: 28662316	Pubmed	Collected by the present study	Neg	Neg	Neg
260	1,4-Dicaffeoylquinic Acid	[H]C1(OC(=O)C=CC2=CC(O)=C(O)C=C2)C(O)CC(CC1O)(OC(=O)C=CC1=CC(O)=C(O)C=C1)C(O)=O	DOI: 10.15991/j.cnki.41-1361/r.2011.04.006	CNKI	Collected by the present study	Neg	Neg	Pos
261	4,5-Di-O-Caffeoylquinic Acid	OC1CC(O)(CC(OC(=O)C=CC2=CC(O)=C(O)C=C2)C1OC(=O)C=CC1=CC(O)=C(O)C=C1)C(O)=O	PMID: 26333346	Pubmed	Collected by the present study	Neg	Neg	Pos
262	Cynarin	OC1CC(CC(OC(=O)C=CC2=CC(O)=C(O)C=C2)C1O)(OC(=O)C=CC1=CC(O)=C(O)C=C1)C(O)=O	DOI: 10.14163/j.cnki.11-5547/r.2016.24.200	CNKI	Collected by the present study	Neg	Neg	Pos
263	3,5-Di-O-Caffeoyl-Muco-Quinic Acid,Isochlorogenic Acid A	OC1C(CC(O)(CC1OC(=O)C=CC1=CC(O)=C(O)C=C1)C(O)=O)OC(=O)C=CC1=CC(O)=C(O)C=C1	PMID: 26333346,PMID: 28052484	Pubmed	Collected by the present study	Neg	Neg	Pos
264	Schizandrin A	COC1=C(OC)C(OC)=C2C(=C1)C(OC(=O)C(C)=CC)C(C)(O)C(C)CC1=CC(O)=C(OC)C(OC)=C21	PMID: 29309862	Pubmed	Collected by the present study	Neg	Pos	Pos
265	Schisantherin D	COC1=C2C(CC(C)C(C)(O)C(OC(=O)C3=CC=CC=C3)C3=CC4=C(OCO4)C(OC)=C23)=CC2=C1OCO2	DOI: 10.13457/j.cnki.jncm.2009.07.003	CNKI	Collected by the present study	Neg	Neg	Pos
266	Iridin	COC1=CC(=CC(O)=C1OC)C1=COC2=CC(OC3OC(CO)C(O)C(O)C3O)=C(OC)C(O)=C2C1=O	PMID: 27570425	Pubmed	Collected by the present study	Neg	Neg	Pos
267	Cordifoliside A	COC(=O)C1=C2CCC3C(=O)OC(CC3(C)C2CCC1OC1OC(CO)C(O)C(O)C1O)C1=COC=C1	PMID: 21595500	Pubmed	Collected by the present study	Neg	Pos	Pos
268	Melittoside	OCC1OC(OC2OC=CC3(OC4OC(CO)C(O)C(O)C4O)C(O)C=C(CO)C23)C(O)C(O)C1O	PMID: 17490493	Pubmed	Collected by the present study	Neg	Neg	Pos
269	Punarnavoside	OCC1OC(OC2=C(CC3=CC=CC=C3)C=C(OC(=O)CCC3=CC=C(O)C=C3)C(O)=C2)C(O)C(O)C1O	PMID: 21595500	Pubmed	Collected by the present study	Neg	Neg	Neg
270	3,5-Di-O-Caffeoylquinic Acid	COC(=O)C1(O)CC(OC(=O)C=CC2=CC(O)=C(O)C=C2)C(O)C(C1)OC(=O)C=CC1=CC(O)=C(O)C=C1	PMID: 26333346	Pubmed	Collected by the present study	Neg	Neg	Pos
271	Alisol F 24-Acetate	CC1CC(OC2CC3(C)C(CC(O)C4C5(C)CCC(=O)C(C)(C)C5CCC34C)=C12)C(OC(C)=O)C(C)(C)O	PMID: 23730837	Pubmed	Collected by the present study	Neg	Neg	Neg
272	Ruberythric Acid	OC1COC(OCC2OC(OC3=C(O)C4=C(C=C3)C(=O)C3=CC=CC=C3C4=O)C(O)C(O)C2O)C(O)C1O	PMID: 29953177	Pubmed	Collected by the present study	Neg	Neg	Pos
273	Arctiin	COC1=C(OC)C=C(CC2COC(=O)C2CC2=CC(OC)=C(OC3OC(CO)C(O)C(O)C3O)C=C2)C=C1	DOI: 10.19540/j.cnki.cjcmm.20170121.021	CNKI	Collected by the present study	Neg	Neg	Neg
274	β-Carotene	CC(C=CC=C(C)C=CC1=C(C)CCCC1(C)C)=CC=CC=C(C)C=CC=C(C)C=CC1=C(C)CCCC1(C)C	PMID: 29992106	Pubmed	Collected by the present study	Neg	Neg	Neg
275	Nimbin	COC(=O)CC1C2(C)C(OC3CC(C(C)=C23)C2=COC=C2)C(OC(C)=O)C2C(C)(C=CC(=O)C12C)C(=O)OC	PMID: 21595500	Pubmed	Collected by the present study	Neg	Neg	Pos
276	Cornuside	COC(=O)C1=COC(OC2OC(CO)C(O)C(O)C2O)C(C=C)C1CCOC(=O)C1=CC(O)=C(O)C(O)=C1	DOI: 10.11967/2017150402	CNKI	Collected by the present study	Neg	Neg	Pos
277	Homoharringtonine	COC(=O)CC(O)(CCCC(C)(C)O)C(=O)OC1C2C3=CC4=C(OCO4)C=C3CCN3CCCC23C=C1OC	DOI: 10.11653/zgsyfjxzz2013070358	CNKI	Collected by the present study	Neg	Pos	Pos
278	2-[(4-{1,3-dihydroxy-2-[4-(3-hydroxyprop-1-en-1-yl)-2-methoxyphenoxy]propyl}-2-methoxyphenyl)methoxy]-6-(hydroxymethyl)oxane-3,4,5-triol	[H]C(CO)(OC1=C(OC)C=C(C=CCO)C=C1)C(O)C1=CC=C(COC2OC(CO)C(O)C(O)C2O)C(OC)=C1	-	CNKI	Collected by the present study	Neg	Neg	Pos
279	Sikokianin A	COC1=CC=C(C=C1)C1OC2=CC(O)=CC(O)=C2C(=O)C1C1C(OC2=CC(O)=CC(O)=C2C1=O)C1=CC=C(O)C=C1	DOI: 10.3969/j.issn.1006-0111.2012.02.005	CNKI	Collected by the present study	Neg	Neg	Pos
280	Cucurbitacin E	CC(=O)OC(C)(C)C=CC(=O)C(C)(O)C1C(O)CC2(C)C3CC=C4C(C=C(O)C(=O)C4(C)C)C3(C)C(=O)CC12C	PMID: 21595500	Pubmed	Collected by the present study	Neg	Neg	Neg
281	Neanoside B	COCC1=C(O)C2=CC=CC=C2C(O)=C1COC1OC(COC2OC(CO)C(O)C(O)C2O)C(O)C(O)C1O	PMID: 28833268	Pubmed	Collected by the present study	Neg	Neg	Pos
282	Cucurbitacin B,2–Epicucurbitacin B	CC(=O)OC(C)(C)C=CC(=O)C(C)(O)C1C(O)CC2(C)C3CC=C4C(CC(O)C(=O)C4(C)C)C3(C)C(=O)CC12C	PMID: 22136107	Pubmed	Collected by the present study	Neg	Neg	Neg
283	Spicatolignan A	COC1=CC(C=CC(O)=O)=CC2=C1OC(=C2COC1OC(CO)C(O)C(O)C1O)C1=CC(OC)=C(O)C(OC)=C1	PMID: 22136107	Pubmed	Collected by the present study	Neg	Neg	Pos
284	Rhoifolin	CC1OC(OC2C(O)C(O)C(CO)OC2OC2=CC(O)=C3C(=O)C=C(OC3=C2)C2=CC=C(O)C=C2)C(O)C(O)C1O	PMID: 29309862	Pubmed	Collected by the present study	Neg	Neg	Pos
285	Naringin	CC1OC(OC2C(O)C(O)C(CO)OC2OC2=CC(O)=C3C(=O)CC(OC3=C2)C2=CC=C(O)C=C2)C(O)C(O)C1O	PMID: 27570425	Pubmed	Collected by the present study	Neg	Neg	Neg
286	Benzoylpaeoniflorin	CC12CC3(O)OC(O1)C1(COC(=O)C4=CC=CC=C4)C3CC21OC1OC(COC(=O)C2=CC=CC=C2)C(O)C(O)C1O	PMID: 29616383	Pubmed	Collected by the present study	Neg	Neg	Pos
287	Raddeanin Ｒ0	CC1(C)CCC2(CCC3(C)C(=CCC4C5(C)CCC(OC6OCC(O)C(O)C6O)C(C)(C)C5CCC34C)C2C1)C(O)=O	1003-3734(2017)11-1259-07	CNKI	Collected by the present study	Neg	Neg	Neg
288	Linarin	COC1=CC=C(C=C1)C1=CC(=O)C2=C(O)C=C(OC3OC(COC4OC(C)C(O)C(O)C4O)C(O)C(O)C3O)C=C2O1	1003-3734(2016)23-2647-06	CNKI	Collected by the present study	Neg	Neg	Pos
289	Saponarin	OCC1OC(OC2=C(C3OC(CO)C(O)C(O)C3O)C(O)=C3C(=O)C=C(OC3=C2)C2=CC=C(O)C=C2)C(O)C(O)C1O	PMID: 22136107	Pubmed	Collected by the present study	Neg	Neg	Pos
290	Pentaacetyl Geniposide	COC(=O)C1=COC(OC2OC(COC(C)=O)C(OC(C)=O)C(OC(C)=O)C2OC(C)=O)C2C1CC=C2COC(C)=O	PMID: 26828466	Pubmed	Collected by the present study	Neg	Neg	Pos
291	Garcinol	CC(C)=CCC(CC12CC(CC=C(C)C)C(C)(C)C(CC=C(C)C)(C(=O)C(=C(O)C3=CC(O)=C(O)C=C3)C1=O)C2=O)C(C)=C	DOI: 10.3969/j.issn.1003-9783.2016.03.028	CNKI	Collected by the present study	Neg	Neg	Pos
292	Rutin	CC1OC(OCC2OC(OC3=C(OC4=CC(O)=CC(O)=C4C3=O)C3=CC(O)=C(O)C=C3)C(O)C(O)C2O)C(O)C(O)C1O	PMID: 22136107	Pubmed	Collected by the present study	Neg	Neg	Pos
293	Neohesperidin	COC1=C(O)C=C(C=C1)C1CC(=O)C2=C(O)C=C(OC3OC(CO)C(O)C(O)C3OC3OC(C)C(O)C(O)C3O)C=C2O1	PMID: 29616383	Pubmed	Collected by the present study	Neg	Neg	Neg
294	Chiratin	COC1=C(O)C=C(C=C1)C1CC(=O)C2=C(O)C=C(OC3OC(COC4OC(C)C(O)C(O)C4O)C(O)C(O)C3O)C=C2O1	PMID: 22136107	Pubmed	Collected by the present study	Neg	Neg	Neg
295	Hydroxysafflor Yellow A	OCC1OC(C(O)C(O)C1O)C1=C(O)C(=C(O)C=CC2=CC=C(O)C=C2)C(=O)C(O)(C2OC(CO)C(O)C(O)C2O)C1=O	PMID: 27570425	Pubmed	Collected by the present study	Neg	Neg	Pos
296	Haleniaside	COC1=CC2=C(OC3=CC(OC)=C(OC)C(OC4OC(OC5OCC(O)C(O)C5O)C(O)C(O)C4O)=C3C2=O)C(OC)=C1	PMID: 26392708	Pubmed	Collected by the present study	Neg	Neg	Pos
297	Oleanolic Acid-28-O-β-D-Glucopyranoside	[H]C12CC(C)(C)CCC1(CCC1(C)C2=CCC2([H])C3(C)CCC(O)C(C)(C)C3([H])CCC12C)C(=O)OC1OC(CO)C(O)C(O)C1O	DOI: 10.15991/j.cnki.41-1361/r.2011.04.006	CNKI	Collected by the present study	Neg	Neg	Neg
298	Ginsenoside Ck	CC(C)=CCCC(C)(OC1OC(CO)C(O)C(O)C1O)C1CCC2(C)C1C(O)CC1C3(C)CCC(O)C(C)(C)C3CCC21C	PMID: 29765322	Pubmed	Collected by the present study	Neg	Neg	Neg
299	Pedicularioside G,Verbascoside	CC1OC(OC2C(O)C(OCCC3=CC(O)=C(O)C=C3)OC(CO)C2OC(=O)C=CC2=CC(O)=C(O)C=C2)C(O)C(O)C1O	PMID: 26828466,PMID: 21595500	Pubmed	Collected by the present study	Neg	Neg	Pos
300	Forsythoside A	CC1OC(OCC2OC(OCCC3=CC(O)=C(O)C=C3)C(O)C(O)C2OC(=O)C=CC2=CC(O)=C(O)C=C2)C(O)C(O)C1O	PMID: 23265871	Pubmed	Collected by the present study	Neg	Neg	Pos
301	Isoverbascoside	CC1OC(OC2C(O)C(COC(=O)C=CC3=CC(O)=C(O)C=C3)OC(OCCC3=CC(O)=C(O)C=C3)C2O)C(O)C(O)C1O	PMID: 26006028	Pubmed	Collected by the present study	Neg	Neg	Pos
302	Neferine	COC1=CC=C(CC2N(C)CCC3=CC(OC)=C(OC4=C(O)C=CC(CC5N(C)CCC6=CC(OC)=C(OC)C=C56)=C4)C=C23)C=C1	DOI: 10.13192/j.issn.1000-1719.2018.04.066	CNKI	Collected by the present study	Neg	Neg	Neg
303	Gambogenic Acid	CC(C)=CCCC(C)=CCC1=C(O)C2=C(OC34C5CC(C=C3C2=O)C(=O)C4(CC=C(C)C(O)=O)OC5(C)C)C(CC=C(C)C)=C1O	PMID: 25447209	Pubmed	Collected by the present study	Neg	Neg	Pos
304	Corilagin	OC1C2COC(=O)C3=CC(O)=C(O)C(O)=C3C3=C(O)C(O)=C(O)C=C3C(=O)OC1C(O)C(OC(=O)C1=CC(O)=C(O)C(O)=C1)O2	PMID: 26879574	Pubmed	Collected by the present study	Neg	Neg	Pos
305	3‴-O-Methylcrenatoside	COC1=C(O)C=CC(C=CC(=O)OC2C(CO)OC3OCC(OC3C2OC2OC(C)C(O)C(O)C2O)C2=CC(O)=C(O)C=C2)=C1	PMID: 29616383	Pubmed	Collected by the present study	Neg	Neg	Pos
306	Leucoseceptoside A	COC1=C(O)C=CC(C=CC(=O)OC2C(CO)OC(OCCC3=CC(O)=C(O)C=C3)C(O)C2OC2OC(C)C(O)C(O)C2O)=C1	PMID: 29616383	Pubmed	Collected by the present study	Neg	Neg	Pos
307	Martynoside	COC1=C(O)C=C(CCOC2OC(CO)C(OC(=O)C=CC3=CC(OC)=C(O)C=C3)C(OC3OC(C)C(O)C(O)C3O)C2O)C=C1	PMID: 29616383	Pubmed	Collected by the present study	Neg	Neg	Pos
308	Icariin	COC1=CC=C(C=C1)C1=C(OC2OC(C)C(O)C(O)C2O)C(=O)C2=C(O1)C(CC=C(C)C)=C(OC1OC(CO)C(O)C(O)C1O)C=C2O	PMID: 26828466	Pubmed	Collected by the present study	Neg	Neg	Pos
309	Xanthomol	COC(=O)C12OC3=C(C(O)=C(C(C)=C3)C3=C(O)C4=C(OC5(CO)C(O)CCC(=O)C5=C4O)C=C3C)C(O)=C1C(=O)CCC2OC(=O)C1=CC=CC=C1	PMID: 23524937	Pubmed	Collected by the present study	Neg	Neg	Pos
310	Celosin B	CC1(C)CCC2(CCC3(C)C(=CCC4C5(C)CC(O)C(OC6OC(C(O)C(O)C6OC6OC(CO)C(O)C(O)C6O)C(O)=O)C(C)(C5CCC34C)C(O)=O)C2C1)C(O)=O	PMID: 21595500	Pubmed	Collected by the present study	Neg	Neg	Pos
311	Rhein 8-O-Glucoside	OCC1OC(OC2=CC=CC3=C2C(=O)C2=C(O)C=C(C=C2C3=O)C(O)=O)C(O)C(O)C1O	PMID: 29616383	Pubmed	Collected by the present study	Neg	Neg	Pos
312	Resveratrol	OC1=CC=C(C=CC2=CC(O)=CC(O)=C2)C=C1	PMID: 26561740	Pubmed	Collected by the present study	Neg	Neg	Pos
